# Supplementary material for: Kinase Pathway Dependence in Primary Human Leukemias Determined by Rapid Inhibitor Screening
Source: Oxford University Press journal article supplement (doi:10.1158/0008-5472.can-12-1906), 2012-10-19
Supplement: 00085472can121906-sup-t1_xls_114k.xls [file 00085472can121906-sup-t1_xls_114k.xls]

## Sheet: Sheet1
Kinase Target Matrix	ABT-869	AMG-706	AST-487	AZD-1152HQPA	BIRB-796	BMS-387032	CHIR-258	CHIR-265	CI-1033	CP-690550	Dasatinib	EKB-569	Erlotinib	Flavopiridol	Gefitinib	GW-2580	GW-786034	Imatinib	JNJ-7706621	Lapatinib	LY-333531	MLN-518	MLN-8054	PI-103	PKC-412	PTK787	CYC-202	SB-202190	SB-203580	Sorafenib	Staurosporine	SU-14813	Sunitinib	VX-680	VX-745	ZD-6474	CAL101	IC87114	AG490	AKT IV	AKT X	AMPK	AP24534	PCI32765	PCI33918	CYT387	EGFR	Gö6976	H-89
AAK1	0	0	0	0	0	1	3	2	0	0	0	5	4	3	0	0	4	0	1	0	3	0	0	0	1	0	0	0	0	0	2	3	3	2	0	0	0	0	0	0	0	0	0	0	0	0	0	0	0
ABL1	0	4	2	0	4	0	4	0	5	0	1	4	3	0	0	0	3	2	2	0	0	0	3	0	0	0	0	0	0	3	5	4	5	1	3	2	0	0	0	0	0	0	1	4	1	2	0	0	0
ABL1(E255K)	0	0	3	0	0	0	4	2	4	0	2	4	4	0	0	0	0	3	3	0	0	0	3	0	0	0	0	0	0	4	5	0	5	2	0	3	0	0	0	0	0	0	1	4	1	2	0	0	0
ABL1(H396P)	0	0	2	0	0	0	4	2	4	0	2	4	3	0	0	0	0	2	2	0	0	0	3	0	0	0	0	0	0	4	4	4	5	1	3	2	0	0	0	0	0	0	1	4	1	2	0	0	0
ABL1(M351T)	0	0	2	0	4	0	4	2	4	0	1	3	3	0	0	0	0	2	2	0	0	0	2	0	0	0	0	0	0	3	4	4	5	1	3	2	0	0	0	0	0	0	1	4	1	2	0	0	0
ABL1(Q252H)	0	0	2	0	5	0	4	2	4	0	2	3	3	0	0	0	0	2	2	0	0	0	2	0	0	0	0	0	0	3	4	4	5	1	3	2	0	0	0	0	0	0	1	4	1	2	0	0	0
ABL1(T315I)	4	0	1	3	3	0	3	2	4	0	4	4	3	0	0	0	4	0	1	0	0	0	2	0	3	0	0	0	0	3	4	4	4	1	0	2	0	0	0	0	0	0	1	4	1	2	0	0	0
ABL1(Y253F)	0	0	2	0	5	0	4	3	4	0	2	3	3	0	0	0	0	2	2	0	0	0	2	0	0	0	0	0	0	3	5	4	5	1	3	2	0	0	0	0	0	0	1	4	1	2	0	0	0
ABL2	0	0	2	0	0	0	0	2	4	0	1	4	3	0	0	0	4	2	0	0	0	0	3	0	0	0	0	0	0	4	4	0	5	1	3	2	0	0	0	0	0	0	1	0	0	0	0	0	0
ACVR1	0	0	0	0	0	0	0	3	5	0	4	0	0	3	0	0	0	0	3	0	0	4	0	0	0	0	0	0	0	0	5	0	0	3	0	2	0	0	0	0	0	0	0	0	0	0	0	0	0
ACVR1B	0	0	0	0	0	0	0	0	0	0	4	0	0	0	0	0	0	0	0	0	0	0	0	0	0	0	0	2	3	0	5	0	0	0	0	0	0	0	0	0	0	0	0	0	0	0	0	0	0
ACVR2A	0	0	0	0	0	0	0	0	0	0	4	0	0	0	0	0	0	0	3	0	0	0	0	0	0	0	0	0	0	0	0	0	0	0	0	0	0	0	0	0	0	0	0	0	0	0	0	0	0
ACVR2B	0	0	0	0	0	0	0	0	0	0	4	0	0	3	0	0	4	0	3	0	0	0	0	0	0	0	0	3	0	0	0	0	0	0	0	0	0	0	0	0	0	0	0	0	0	0	0	0	0
ACVRL1	0	0	0	0	0	0	0	0	0	0	4	0	0	0	0	0	0	0	3	0	0	0	0	0	0	0	0	0	0	0	0	0	0	0	0	3	0	0	0	0	0	0	0	0	0	0	0	0	0
ADCK3	0	0	0	0	0	0	0	0	5	0	4	0	4	0	0	0	0	0	2	0	0	0	0	0	0	0	0	0	0	0	0	0	0	0	0	3	0	0	0	0	0	0	0	0	0	0	0	0	0
ADCK4	0	0	0	0	0	0	0	0	5	0	0	5	4	0	0	0	0	0	0	0	0	0	0	0	0	0	0	3	3	0	0	0	0	0	0	3	0	0	0	0	0	0	0	0	0	0	0	0	0
AKT1	0	0	0	0	0	0	0	0	0	0	0	0	0	0	0	0	0	0	0	0	0	0	0	0	3	0	0	0	0	0	3	0	0	0	0	0	0	0	0	1	1	0	0	0	0	0	0	0	0
AKT2	0	0	0	0	0	0	0	0	0	0	0	0	0	0	0	0	0	0	0	0	0	0	0	0	3	0	0	0	0	0	4	0	5	0	0	0	0	0	0	1	1	0	0	0	0	0	0	0	0
AKT3	0	0	0	0	0	0	0	0	0	0	0	0	0	0	0	0	0	0	0	0	3	0	0	0	0	0	0	0	0	0	4	0	0	0	0	0	0	0	0	1	1	0	0	0	0	0	0	0	0
ALK	4	0	4	0	0	0	4	0	0	0	0	5	4	3	0	0	4	0	3	0	0	0	0	0	2	0	1	0	0	0	4	4	4	3	0	3	0	0	0	0	0	0	0	0	0	0	0	0	0
AMPK-alpha1	0	0	4	0	0	0	3	0	0	0	0	0	0	0	0	0	0	0	2	0	0	0	0	0	2	0	0	0	0	0	3	3	3	3	0	0	0	0	0	0	0	1	0	0	0	2	0	0	0
AMPK-alpha2	0	0	0	0	0	0	4	3	0	0	0	0	0	0	0	0	0	0	2	0	0	0	0	0	2	0	0	0	0	0	3	4	4	2	0	0	0	0	0	0	0	1	0	0	0	2	0	0	0
ANKK1	0	0	4	3	4	0	3	0	0	0	0	0	0	0	0	0	0	0	2	0	0	0	0	0	0	0	0	0	0	0	5	3	4	4	0	0	0	0	0	0	0	0	0	0	0	0	0	0	0
ARK5	0	0	0	0	0	0	3	0	0	0	0	0	0	0	0	0	0	0	1	0	3	0	0	0	1	0	0	0	0	0	3	4	3	2	0	0	0	0	0	0	0	0	0	0	0	0	0	0	0
AURKA	4	0	0	3	0	0	0	0	0	0	0	0	4	0	0	0	4	0	2	0	0	0	1	0	2	0	0	0	0	0	4	0	5	1	0	0	0	0	0	0	0	0	4	0	0	0	0	0	0
AURKB	3	0	0	1	0	4	3	0	5	0	0	0	4	0	0	0	0	0	1	0	0	0	1	0	2	0	0	0	0	3	3	4	4	1	0	0	0	0	0	0	0	0	0	0	0	2	0	0	0
AURKC	3	3	4	1	0	0	4	0	5	0	0	0	4	0	0	0	3	0	1	0	0	3	1	0	2	0	0	0	0	3	3	4	4	1	0	3	0	0	0	0	0	0	0	0	0	2	0	0	0
AXL	3	0	4	2	0	0	4	0	5	0	0	4	0	3	0	0	0	0	3	0	0	0	2	0	3	0	0	0	0	4	3	3	3	2	0	2	0	0	0	0	0	0	0	0	0	0	0	0	0
BIKE	0	0	0	0	0	0	2	0	5	0	0	4	4	0	0	0	4	0	1	0	3	0	0	0	2	0	0	0	0	0	3	3	2	2	0	0	0	0	0	0	0	0	0	0	0	0	0	0	0
BLK	0	3	3	3	4	0	3	0	3	0	1	3	3	0	4	0	4	3	0	0	0	0	2	0	2	0	0	0	0	0	3	4	3	3	4	2	0	0	0	0	0	0	2	1	0	0	0	0	0
BMPR1A	0	0	0	0	0	0	0	0	0	0	0	0	0	0	0	0	0	0	0	0	0	0	0	0	0	0	0	0	0	0	0	0	0	0	0	0	0	0	0	0	0	0	0	0	0	0	0	0	0
BMPR2	5	0	0	0	0	0	4	0	0	0	0	0	0	0	0	0	0	0	2	0	0	0	0	0	0	0	0	0	0	0	0	3	4	4	0	0	0	0	0	0	0	0	0	0	0	0	0	0	0
BMX	0	0	0	0	0	0	0	0	5	0	2	5	0	0	0	0	0	0	3	0	0	0	3	0	0	0	0	0	0	0	4	0	0	3	0	0	0	0	0	0	0	0	3	1	0	0	0	0	0
BRAF	0	3	4	0	4	0	0	0	0	0	4	0	0	0	0	0	3	0	0	0	0	0	0	4	0	0	0	3	2	3	0	0	0	0	0	0	0	0	0	0	0	0	3	0	0	2	0	0	0
BRAF(V600E)	0	2	3	0	0	0	0	2	0	0	4	0	0	0	0	0	3	4	0	0	0	0	0	4	0	0	0	2	2	3	0	0	0	0	0	0	0	0	0	0	0	0	3	0	0	2	0	0	0
BRSK1	0	0	0	0	0	0	0	2	0	0	0	0	0	0	0	0	0	0	3	0	0	0	0	0	3	0	0	0	0	0	4	5	5	0	0	0	0	0	0	0	0	0	0	0	0	0	0	0	0
BRSK2	0	0	0	0	0	0	0	0	0	0	0	0	0	0	0	0	0	0	3	0	0	0	0	0	3	0	0	0	0	0	3	5	5	0	0	0	0	0	0	0	0	0	0	0	0	0	0	0	0
BTK	0	0	0	0	0	0	0	0	5	0	2	5	0	0	0	0	0	0	0	0	0	0	3	0	0	0	0	0	0	0	4	0	0	4	0	0	0	0	0	0	0	0	4	1	1	0	0	0	0
CAMK1	0	0	5	0	0	0	0	0	0	4	0	0	0	0	0	0	4	0	0	0	0	0	0	0	3	0	0	0	0	0	4	5	5	0	0	0	0	0	0	0	0	0	0	0	0	0	0	0	0
CAMK1D	0	0	0	0	0	0	0	0	0	0	0	5	0	0	0	0	0	0	0	0	0	0	0	0	3	0	0	0	0	0	2	4	4	4	0	0	0	0	0	0	0	0	0	0	0	0	0	0	0
CAMK1G	0	0	0	0	0	0	0	0	0	0	0	0	0	0	0	0	4	0	0	0	0	0	0	0	3	0	0	0	0	0	3	4	4	0	0	0	0	0	0	0	0	0	0	0	0	0	0	0	0
CAMK2A	0	0	0	0	0	0	0	0	0	0	0	0	0	3	0	0	0	0	0	0	4	0	0	0	1	0	0	0	0	0	1	4	4	0	0	0	0	0	0	0	0	0	0	0	0	0	0	0	0
CAMK2B	0	0	0	0	0	0	0	0	0	0	0	0	0	0	0	0	0	0	0	0	0	0	0	0	2	0	0	0	0	0	2	4	5	0	0	0	0	0	0	0	0	0	0	0	0	0	0	0	0
CAMK2D	0	0	0	0	0	0	0	0	0	0	0	0	0	0	0	0	0	0	0	0	4	0	0	0	1	0	0	0	0	0	2	4	4	0	0	0	0	0	0	0	0	0	0	0	0	0	0	0	0
CAMK2G	0	0	0	0	0	0	0	0	0	0	0	0	0	0	0	0	0	0	0	0	4	0	0	0	2	0	0	0	0	0	2	4	4	0	0	0	0	0	0	0	0	0	0	0	0	0	0	0	0
CAMK4	0	0	5	0	0	0	0	0	0	0	0	0	0	3	0	0	0	0	0	0	0	0	0	0	0	0	0	0	0	0	4	5	5	0	0	0	0	0	0	0	0	0	0	0	0	0	0	0	0
CAMKK1	0	0	3	0	0	0	4	0	0	0	0	5	0	2	0	0	0	0	3	0	4	0	0	0	2	0	0	0	0	0	1	4	4	0	0	0	0	0	0	0	0	0	0	0	0	0	0	0	0
CAMKK2	0	0	3	0	0	0	0	0	0	0	0	5	0	2	0	0	0	0	3	0	3	0	0	0	2	0	0	0	0	0	1	4	5	0	0	0	0	0	0	0	0	0	0	0	0	0	0	0	0
CDC2L1	4	0	4	3	0	0	0	0	0	0	0	0	0	0	0	0	4	0	1	0	0	0	0	0	0	0	0	0	0	0	0	0	0	2	0	0	0	0	0	0	0	0	0	0	0	0	0	0	0
CDC2L2	4	0	4	3	0	2	0	0	0	0	0	0	0	0	0	0	3	0	1	0	0	0	0	0	0	0	0	0	0	0	0	0	0	2	0	0	0	0	0	0	0	0	0	0	0	0	0	0	0
CDK11	3	0	1	0	3	1	0	0	0	0	0	0	0	1	0	0	0	4	0	0	0	0	0	0	4	0	0	0	0	3	4	0	0	0	0	0	0	0	0	0	0	0	0	0	0	0	0	0	0
CDK2	0	0	4	0	0	3	0	3	0	0	0	0	0	2	0	0	0	0	1	0	0	0	0	0	0	0	2	0	0	0	3	0	0	0	0	0	0	0	0	0	0	0	0	0	0	1	0	0	0
CDK3	0	0	3	0	0	1	0	0	0	0	0	0	0	2	0	0	0	0	1	0	0	0	0	0	0	0	0	0	0	0	4	0	0	0	0	0	0	0	0	0	0	0	0	0	0	0	0	0	0
CDK5	0	0	4	0	4	1	0	0	0	0	0	0	0	2	0	0	0	0	2	0	0	0	0	0	0	0	1	0	0	0	4	0	0	0	0	0	0	0	0	0	0	0	0	0	0	2	0	0	0
CDK7	4	0	2	4	0	3	4	0	0	0	0	0	0	1	0	0	0	0	2	0	0	0	0	0	0	0	1	0	0	2	4	4	4	0	0	0	0	0	0	0	0	0	0	0	0	0	0	0	0
CDK8	3	0	1	0	3	1	0	0	0	0	0	0	0	2	0	0	0	0	0	0	0	0	0	0	0	0	0	0	0	3	5	0	0	0	0	0	0	0	0	0	0	0	0	0	0	0	0	0	0
CDK9	4	0	3	0	0	3	0	0	0	0	0	0	0	1	0	0	0	0	2	0	0	0	0	0	0	0	0	0	0	0	4	0	0	0	0	0	0	0	0	0	0	0	0	0	0	0	0	0	0
CHEK1	0	0	0	0	0	2	4	0	0	0	0	4	0	0	0	0	0	0	0	0	3	0	0	0	3	0	0	0	0	0	3	4	4	0	0	0	0	0	0	0	0	0	0	0	0	0	0	0	0
CIT	0	2	3	4	4	0	5	0	4	0	0	4	4	2	4	0	0	0	0	0	3	0	0	0	0	4	0	2	2	4	5	3	5	0	0	3	0	0	0	0	0	0	0	0	0	0	0	0	0
CLK1	5	0	3	0	0	0	5	1	0	0	0	5	0	3	0	0	0	4	2	0	3	3	0	4	2	0	1	0	0	0	4	4	3	0	0	0	0	0	0	0	0	0	0	0	0	2	0	0	0
CLK2	0	0	4	0	0	2	4	0	0	0	0	4	0	3	0	0	0	0	2	0	3	0	3	0	3	0	1	0	0	0	3	3	3	0	0	0	0	0	0	0	0	0	0	0	0	2	0	0	0
CLK3	0	0	0	0	0	3	0	0	0	0	0	5	0	3	0	0	0	0	2	0	0	0	3	0	0	0	0	0	0	0	5	0	0	0	0	0	0	0	0	0	0	0	0	0	0	0	0	0	0
CLK4	4	0	3	0	0	0	5	0	0	0	0	5	0	0	0	0	0	4	2	0	3	3	0	0	2	0	0	0	0	0	3	3	3	0	0	0	0	0	0	0	0	0	0	0	0	0	0	0	0
CSF1R	1	1	2	3	5	3	2	0	0	0	1	5	0	3	0	1	1	2	3	0	0	1	0	0	2	1	0	0	0	2	3	2	2	3	3	3	0	0	0	0	0	0	2	0	0	2	0	0	0
CSK	0	0	4	0	0	0	0	2	5	0	2	5	0	0	0	0	0	0	0	0	0	0	4	0	4	0	0	0	0	0	5	0	0	4	0	3	0	0	0	0	0	0	3	2	0	0	0	0	0
CSNK1A1L	0	0	0	0	0	0	0	0	0	0	0	4	0	0	0	0	0	0	0	0	0	0	0	0	0	0	0	3	3	0	5	4	4	0	0	0	0	0	0	0	0	0	0	0	0	0	0	0	0
CSNK1D	0	0	4	0	0	0	0	0	0	0	0	4	4	0	0	0	0	0	0	0	0	0	0	0	0	0	1	1	1	0	5	4	3	0	0	0	0	0	0	0	0	0	0	0	0	0	0	0	0
CSNK1E	0	0	5	0	0	3	0	0	0	0	5	3	0	0	3	0	0	0	3	0	0	0	0	0	0	0	1	2	1	0	4	4	3	0	0	3	0	0	0	0	0	0	0	0	0	0	0	0	0
CSNK1G1	0	0	0	0	0	3	0	0	0	0	0	0	0	0	0	0	0	0	2	0	0	0	0	0	0	0	0	0	0	0	0	4	5	0	0	0	0	0	0	0	0	0	0	0	0	0	0	0	0
CSNK1G2	0	0	4	0	0	0	0	0	0	0	0	0	0	0	0	0	0	0	2	0	0	0	0	0	0	0	0	0	0	0	5	4	4	0	0	0	0	0	0	0	0	0	0	0	0	0	0	0	0
CSNK1G3	0	0	3	0	0	0	0	0	0	0	0	0	0	0	0	0	0	0	3	0	0	0	0	0	0	0	2	0	0	0	0	4	4	0	0	0	0	0	0	0	0	0	0	0	0	0	0	0	0
CSNK2A1	0	0	0	0	0	0	4	0	0	0	0	0	0	0	0	0	0	0	0	0	4	0	0	0	2	0	0	0	0	0	4	3	4	2	0	0	0	0	0	0	0	0	0	0	0	0	0	0	0
CSNK2A2	0	0	0	0	0	0	4	0	0	0	0	0	0	0	0	0	0	0	2	0	4	0	0	0	0	0	0	0	0	0	3	3	4	2	0	0	0	0	0	0	0	0	0	0	0	0	0	0	0
DAPK1	0	0	0	0	0	0	0	0	0	0	0	0	0	0	0	0	0	0	0	0	3	0	0	4	3	0	0	0	0	0	2	4	4	0	0	0	0	0	0	0	0	0	0	0	0	0	0	0	0
DAPK2	0	0	0	0	0	0	0	0	0	0	0	0	0	0	0	0	0	0	0	0	0	0	0	4	3	0	0	0	0	0	2	4	4	0	0	0	0	0	0	0	0	0	0	0	0	0	0	0	0
DAPK3	0	0	5	0	0	0	0	0	0	0	0	0	0	0	5	0	0	0	0	0	0	0	0	3	3	0	0	0	0	0	2	3	3	0	0	0	0	0	0	0	0	0	0	0	0	2	0	0	0
DCAMKL1	0	0	0	0	0	0	0	0	0	0	0	0	0	3	0	0	0	0	3	0	0	0	0	0	0	0	0	0	0	0	4	4	4	0	0	0	0	0	0	0	0	0	0	0	0	0	0	0	0
DCAMKL2	0	0	0	0	0	3	0	0	0	0	0	0	0	0	0	0	0	0	3	0	0	0	0	0	0	0	0	0	0	0	4	0	5	0	0	0	0	0	0	0	0	0	0	0	0	0	0	0	0
DCAMKL3	0	0	0	0	0	3	4	0	0	1	0	5	0	3	0	0	0	0	3	0	0	0	0	0	0	0	0	0	0	0	3	3	4	3	0	0	0	0	0	0	0	0	0	0	0	0	0	0	0
DDR1	2	2	1	3	1	3	4	0	4	0	1	0	4	0	0	0	2	1	0	0	0	3	3	0	4	2	0	3	2	1	3	0	5	1	3	1	0	0	0	0	0	0	0	0	0	0	0	0	0
DDR2	4	0	2	0	2	0	0	1	0	0	2	0	0	0	0	0	2	2	0	0	0	0	0	0	0	0	0	3	3	1	4	0	0	2	0	2	0	0	0	0	0	0	3	0	0	0	0	0	0
DLK	0	0	4	0	0	0	4	2	0	0	0	5	0	0	0	0	0	0	3	0	0	0	0	0	0	0	0	0	0	0	5	4	4	2	0	0	0	0	0	0	0	0	0	0	0	0	0	0	0
DMPK	0	0	0	0	0	0	0	0	0	0	5	3	4	3	5	0	0	0	2	0	3	0	0	0	3	0	0	0	0	0	3	0	0	0	0	0	0	0	0	0	0	0	0	0	0	0	0	0	0
DMPK2	0	0	0	0	4	0	0	0	0	0	5	0	4	0	0	0	0	0	0	0	0	0	0	0	0	0	0	2	2	0	4	0	0	0	0	3	0	0	0	0	0	0	0	0	0	0	0	0	0
DRAK1	0	0	0	0	0	0	4	0	0	0	0	3	0	0	4	0	0	4	3	0	0	0	2	0	3	0	0	0	0	0	3	2	2	0	0	0	0	0	0	0	0	0	0	0	0	0	0	0	0
DRAK2	0	0	0	0	0	2	4	0	0	0	0	5	0	3	4	0	0	0	0	0	0	0	1	0	3	0	0	0	0	0	3	4	4	0	0	0	0	0	0	0	0	0	0	0	0	0	0	0	0
DYRK1B	0	0	0	0	0	0	0	0	0	0	0	5	0	2	0	0	0	0	0	0	4	0	0	0	2	0	1	0	0	0	4	5	5	0	0	0	0	0	0	0	0	0	0	0	0	0	0	0	0
EGFR	0	1	4	3	5	2	0	0	1	0	4	1	1	0	1	0	0	0	0	1	0	3	0	0	3	0	0	3	3	0	5	0	0	0	0	1	0	0	0	0	0	0	0	2	4	0	2	0	0
EGFR(E746-A750del)	0	0	4	0	0	0	0	0	1	0	4	1	1	0	1	0	0	0	0	1	0	3	0	0	4	0	0	2	2	0	4	0	0	0	0	1	0	0	0	0	0	0	0	2	4	0	2	0	0
EGFR(G719C)	5	3	3	2	5	0	0	0	1	0	4	1	1	0	1	0	0	0	0	1	0	2	0	0	3	0	0	2	2	0	5	5	5	0	0	1	0	0	0	0	0	0	0	2	4	0	2	0	0
EGFR(G719S)	0	3	4	2	5	0	0	0	1	0	3	1	1	0	1	0	0	0	0	1	0	2	0	0	3	0	0	3	3	0	5	0	0	0	0	1	0	0	0	0	0	0	0	2	4	0	2	0	0
EGFR(L747-E749del, A750P)	0	3	3	3	5	0	0	0	1	0	4	1	1	3	1	0	0	5	0	1	0	3	0	0	3	0	0	3	3	0	4	0	0	0	0	1	0	0	0	0	0	0	0	2	4	0	2	0	0
EGFR(L747-S752del, P753S)	0	4	4	4	0	0	0	0	1	0	4	1	1	0	1	0	0	0	0	1	0	3	3	0	3	0	0	3	3	0	5	0	0	0	0	1	0	0	0	0	0	0	0	2	4	0	2	0	0
EGFR(L747-T751del,Sins)	0	3	4	3	5	0	0	0	1	0	4	1	1	0	1	0	0	0	0	1	0	3	0	0	3	0	0	3	3	0	4	0	0	0	0	1	0	0	0	0	0	0	0	2	4	0	2	0	0
EGFR(L858R)	0	0	4	3	0	0	0	0	1	0	4	1	1	0	1	0	0	0	0	1	0	3	3	0	3	0	0	3	3	0	5	0	0	0	0	1	0	0	0	0	0	0	0	2	4	0	2	0	0
EGFR(L861Q)	0	4	4	3	0	0	0	0	1	0	4	1	1	0	1	0	0	0	0	1	0	3	0	0	3	0	0	3	3	0	5	0	0	0	0	1	0	0	0	0	0	0	0	2	4	0	2	0	0
EGFR(S752-I759del)	0	0	0	4	0	0	0	0	1	0	4	1	1	3	1	0	0	0	0	1	0	3	0	0	3	0	0	3	3	0	5	0	0	0	0	1	0	0	0	0	0	0	0	2	4	0	2	0	0
EPHA1	0	0	0	0	5	0	0	0	5	0	2	0	0	0	4	0	0	0	0	0	0	0	3	0	0	0	0	0	0	4	5	0	0	3	0	2	0	0	0	0	0	0	4	0	0	0	0	0	0
EPHA2	0	0	3	0	5	0	0	0	0	0	1	0	0	3	0	0	0	0	0	0	0	0	2	0	0	0	0	0	0	4	5	0	0	3	0	3	0	0	0	0	0	0	2	0	0	0	0	0	0
EPHA3	4	0	3	0	4	0	0	3	5	0	1	5	4	3	0	0	0	0	0	0	0	0	3	0	0	0	0	0	0	4	4	0	5	3	0	3	0	0	0	0	0	0	2	0	0	0	0	0	0
EPHA4	0	0	4	0	4	0	0	0	5	0	2	0	0	0	0	0	0	0	0	0	0	0	2	0	0	0	0	0	0	4	5	0	0	4	0	3	0	0	0	0	0	0	1	0	0	0	0	0	0
EPHA5	0	0	3	0	4	0	0	0	4	0	1	0	0	0	0	0	0	0	0	0	0	0	3	0	0	0	0	0	0	0	4	0	0	0	0	2	0	0	0	0	0	0	1	0	0	0	0	0	0
EPHA6	3	3	4	0	4	0	0	0	4	0	0	0	4	0	4	0	0	0	0	0	0	0	2	0	0	0	0	3	2	3	5	4	5	0	0	2	0	0	0	0	0	0	0	0	0	0	0	0	0
EPHA7	3	0	4	0	4	0	0	3	0	0	0	0	4	0	0	0	0	0	3	0	0	0	3	0	0	0	0	0	0	4	5	0	5	0	0	3	0	0	0	0	0	0	2	0	0	0	0	0	0
EPHA8	0	0	2	0	3	0	0	0	5	0	1	5	4	0	4	0	0	4	0	0	0	0	0	0	0	0	0	0	0	4	4	0	0	3	0	2	0	0	0	0	0	0	2	0	0	0	0	0	0
EPHB1	0	0	3	0	5	0	0	2	0	0	1	0	0	0	0	0	0	0	0	0	0	0	2	0	0	0	0	0	0	4	4	0	4	3	0	2	0	0	0	0	0	0	2	0	0	2	0	0	0
EPHB2	0	0	3	0	4	0	0	0	5	0	1	0	0	0	0	0	0	0	0	0	0	0	0	0	0	0	0	0	0	4	5	0	0	0	0	2	0	0	0	0	0	0	1	0	0	0	0	0	0
EPHB3	4	0	0	0	0	0	0	0	0	0	2	0	0	0	0	0	0	0	0	0	0	0	3	0	0	0	0	0	0	0	0	0	0	0	0	0	0	0	0	0	0	0	1	0	0	0	0	0	0
EPHB4	4	0	0	0	0	0	0	0	5	0	1	5	0	0	0	0	0	0	0	0	0	0	2	0	0	0	0	0	0	4	0	0	0	3	0	3	0	0	0	0	0	0	2	0	0	0	0	0	0
ERBB2	0	0	0	3	0	0	0	0	3	0	5	4	0	0	4	0	0	0	0	1	0	0	0	0	0	0	0	0	0	0	0	0	0	0	0	3	0	0	0	0	0	0	0	2	0	0	2	0	0
ERBB4	0	0	0	3	0	0	0	0	3	0	3	2	3	0	3	0	0	0	0	2	0	0	0	0	3	0	0	3	0	0	5	0	0	0	0	3	0	0	0	0	0	0	4	1	0	0	2	0	0
ERK1	0	0	0	0	0	0	0	2	0	0	0	0	0	0	0	0	0	0	0	0	0	0	0	0	0	0	0	0	0	0	0	0	0	0	0	0	0	0	0	0	0	0	0	0	0	0	0	0	0
ERK2	0	0	0	0	0	0	0	0	0	0	0	0	0	0	0	0	0	0	0	0	0	0	0	0	0	0	0	0	0	0	0	0	0	0	0	0	0	0	0	0	0	0	0	0	0	2	0	0	0
ERK3	0	0	0	0	0	0	0	0	5	0	0	0	0	0	4	0	0	0	2	0	0	0	0	0	0	0	0	0	0	0	0	0	0	0	0	3	0	0	0	0	0	0	0	0	0	0	0	0	0
ERK4	0	0	0	0	0	2	0	0	0	0	0	0	4	0	4	0	0	0	2	0	0	0	0	0	0	0	0	0	0	0	0	0	0	0	0	0	0	0	0	0	0	0	0	0	0	0	0	0	0
ERK5	0	0	0	0	0	3	0	0	0	0	0	0	0	2	0	0	0	0	2	0	0	0	0	0	0	0	0	0	0	0	5	0	0	0	0	0	0	0	0	0	0	0	0	0	0	0	0	0	0
ERK8	4	0	3	0	4	2	0	0	0	0	0	0	0	2	0	0	0	0	2	0	2	0	0	0	0	0	0	0	0	2	4	0	0	0	0	0	0	0	0	0	0	0	0	0	0	0	0	0	0
FER	0	0	4	0	0	2	0	0	0	0	0	5	0	0	0	0	4	0	0	0	0	0	3	0	3	0	0	0	0	0	3	3	5	0	0	0	0	0	0	0	0	0	4	0	0	0	0	0	0
FES	0	0	4	0	0	0	0	0	0	0	0	5	0	0	0	0	0	0	0	0	0	0	0	0	0	0	0	0	0	0	3	0	5	0	0	0	0	0	0	0	0	0	4	0	0	2	0	0	0
FGFR1	0	4	4	0	5	0	3	0	0	0	5	0	0	0	0	0	3	0	2	0	0	0	3	0	3	0	0	0	0	4	4	4	4	3	0	3	0	0	0	0	0	0	2	0	0	0	0	0	0
FGFR2	0	0	4	0	0	0	3	3	0	0	5	0	0	0	0	0	3	0	2	0	0	0	3	0	3	0	0	0	0	4	4	4	4	3	0	3	0	0	0	0	0	0	2	0	0	0	0	0	0
FGFR3	0	0	0	0	0	0	3	0	0	0	0	0	0	0	0	0	3	0	2	0	0	0	3	0	3	0	0	0	0	0	4	4	4	3	0	3	0	0	0	0	0	0	3	0	0	2	0	0	0
FGFR3(G697C)	0	0	0	0	0	0	3	0	0	0	0	0	0	0	0	0	3	0	2	0	0	0	3	0	0	0	0	0	0	4	5	4	5	3	0	4	0	0	0	0	0	0	3	0	0	2	0	0	0
FGFR4	0	4	4	0	0	0	4	0	0	0	0	0	0	0	0	0	4	0	0	0	0	0	0	0	0	0	0	0	0	0	5	0	0	4	0	0	0	0	0	0	0	0	2	0	0	0	0	0	0
FGR	0	4	3	0	0	0	3	0	5	0	1	4	4	0	0	0	3	4	2	0	0	0	2	0	3	0	0	0	0	0	3	4	4	3	3	2	0	0	0	0	0	0	1	1	0	2	0	0	0
FLT1	2	1	3	2	4	0	3	0	0	0	5	0	5	0	0	0	1	0	2	0	0	4	3	0	2	1	0	0	0	2	4	2	2	2	0	2	0	0	0	0	0	0	2	0	0	2	0	0	0
FLT3	1	2	1	1	4	0	1	2	5	0	0	0	0	0	0	0	3	0	2	0	3	1	0	0	1	0	0	0	0	1	3	1	1	1	0	3	0	0	0	0	0	0	2	0	0	2	0	0	0
FLT3(D835H)	1	4	2	2	0	0	1	3	4	0	5	5	3	3	4	0	3	0	2	0	2	3	0	0	1	0	0	0	0	2	2	2	2	1	0	3	0	0	0	0	0	0	2	0	0	2	0	0	0
FLT3(D835Y)	2	0	2	3	0	4	1	0	4	0	0	5	3	3	4	0	3	0	2	0	2	3	0	0	1	0	0	0	0	2	3	2	2	2	0	3	0	0	0	0	0	0	2	0	0	2	0	0	0
FLT3(ITD)	2	3	2	2	0	3	1	0	5	0	0	0	4	3	0	0	4	0	2	0	3	1	0	0	1	0	0	0	0	2	2	1	2	2	0	3	0	0	0	0	0	0	2	0	0	2	0	0	0
FLT3(N841I)	1	3	1	1	5	0	1	0	5	0	0	4	4	4	4	0	3	0	2	0	3	2	0	0	1	0	0	0	0	1	2	2	2	1	0	3	0	0	0	0	0	0	2	0	0	2	0	0	0
FLT4	2	1	3	0	5	0	3	0	0	0	0	0	4	0	0	0	2	0	2	0	0	0	3	0	3	2	0	0	0	2	4	3	3	3	0	3	0	0	0	0	0	0	2	0	0	0	0	0	0
FRK	3	2	2	0	4	0	4	3	5	0	1	4	4	0	4	0	3	4	0	0	0	0	0	0	3	3	0	3	3	3	4	0	4	3	0	2	0	0	0	0	0	0	2	0	0	0	0	0	0
FYN	0	3	3	0	0	0	3	2	0	0	1	5	0	0	0	0	4	4	0	0	0	0	3	0	3	0	0	0	0	0	4	5	4	3	3	2	0	0	0	0	0	0	1	2	0	0	0	0	0
GAK	0	0	4	0	0	0	3	3	3	0	2	2	1	2	2	0	2	4	3	0	3	0	0	0	2	0	0	1	1	0	3	3	3	3	0	2	0	0	0	0	0	0	0	0	0	0	0	0	0
GCN2(Kin.Dom.2,S808G)	0	4	0	0	0	3	3	0	0	0	5	4	5	0	0	0	0	0	3	0	0	0	0	0	1	0	0	0	0	0	3	4	4	3	0	0	0	0	0	0	0	0	0	0	0	0	0	0	0
GSK3A	0	0	0	0	0	0	0	1	0	0	0	0	0	3	0	0	0	0	1	0	0	0	0	0	3	0	0	0	0	0	4	0	0	0	0	0	0	0	0	0	0	0	0	0	0	0	0	0	0
GSK3B	0	0	0	0	0	1	3	0	0	0	0	0	0	3	0	0	0	0	2	0	4	0	0	0	3	0	0	3	3	0	4	0	0	0	0	0	0	0	0	0	0	0	0	0	0	0	0	0	0
HCK	0	0	4	3	0	1	4	0	5	0	1	4	4	0	4	0	0	0	0	0	0	0	3	0	3	0	0	0	0	0	3	4	5	0	0	2	0	0	0	0	0	0	1	2	0	0	0	0	0
IGF1R	0	0	0	0	0	0	0	2	0	0	0	0	0	0	0	0	0	0	0	0	0	0	0	0	0	0	0	0	0	0	4	0	5	3	0	0	0	0	0	0	0	0	0	0	0	0	0	0	0
IKK	0	0	0	0	0	0	3	0	0	0	0	0	0	3	0	0	0	0	3	0	0	0	0	0	2	0	0	0	0	0	3	4	4	3	0	0	0	0	0	0	0	0	0	0	0	0	0	0	0
INSR	0	0	0	0	0	0	0	0	0	0	0	0	0	0	0	0	0	0	0	0	0	0	0	0	0	0	0	0	0	0	4	4	4	3	0	0	0	0	0	0	0	0	0	0	0	0	0	0	0
INSRR	4	0	4	0	0	0	0	0	0	0	0	0	0	0	0	0	0	0	0	0	0	0	0	0	0	0	0	0	0	0	4	4	4	2	0	0	0	0	0	0	0	0	0	0	0	0	0	0	0
IRAK3	0	0	0	0	0	0	0	0	5	0	0	0	0	0	4	0	3	0	3	0	0	3	3	0	2	0	0	0	0	0	3	4	5	4	0	0	0	0	0	0	0	0	0	0	0	0	0	0	0
ITK	0	0	4	0	0	3	3	0	5	0	0	5	0	0	0	0	0	0	0	0	0	0	0	0	0	0	0	0	0	0	3	3	3	2	0	0	0	0	0	0	0	0	0	4	5	0	0	0	0
JAK1(Kin.Dom.1/JH2 - pseudokinase)	0	0	0	0	0	0	3	0	0	0	0	0	0	0	0	0	0	0	1	0	0	0	0	0	0	0	0	0	0	0	0	3	3	0	0	0	0	0	1	0	0	0	3	0	0	1	0	0	0
JAK2(Kin.Dom.2/JH1 - catalytic)	0	0	4	0	0	0	5	0	0	1	5	0	0	0	0	0	0	0	2	0	0	0	0	0	2	0	0	0	0	0	3	4	4	2	0	0	0	0	1	0	0	0	4	0	0	1	0	0	0
JAK3(Kin.Dom.2/JH1 - catalytic)	0	0	3	0	0	0	5	0	4	1	0	3	4	0	0	0	4	0	1	0	3	0	0	0	1	0	0	0	0	0	3	4	5	3	0	0	0	0	1	0	0	0	3	0	0	2	0	0	0
JNK1	0	0	4	0	0	0	0	0	0	0	0	0	0	0	0	0	0	4	2	0	0	0	0	0	3	0	0	3	2	0	4	0	0	0	0	0	0	0	0	0	0	0	0	0	0	1	0	0	0
JNK2	3	0	3	0	2	0	0	0	0	0	0	0	0	0	0	0	0	0	0	0	0	0	0	0	0	0	0	2	2	0	0	0	0	0	0	0	0	0	0	0	0	0	0	0	0	2	0	0	0
JNK3	0	0	4	0	3	0	0	0	5	0	0	0	0	3	4	0	3	4	2	0	0	0	0	0	3	0	0	1	1	0	4	0	0	3	0	0	0	0	0	0	0	0	0	0	0	2	0	0	0
KIT	1	1	2	1	3	0	2	0	5	0	1	0	0	0	0	0	1	2	2	0	0	1	0	0	2	1	0	0	0	2	3	1	1	2	0	2	0	0	0	0	0	0	2	0	0	0	0	0	0
KIT(D816V)	3	3	4	4	0	0	4	2	5	0	2	0	4	3	4	0	3	4	3	0	3	2	0	0	1	0	0	0	0	3	2	4	4	2	0	2	0	0	0	0	0	0	2	0	0	0	0	0	0
KIT(V559D)	1	1	2	1	3	0	2	3	5	0	1	0	4	0	0	0	1	2	2	0	0	1	0	0	2	1	0	0	0	2	3	1	1	2	0	2	0	0	0	0	0	0	2	0	0	0	0	0	0
KIT(V559D,T670I)	1	1	2	1	3	0	2	2	0	0	0	0	4	0	0	0	1	4	2	0	0	3	0	0	2	0	0	0	0	2	3	1	1	3	0	3	0	0	0	0	0	0	2	0	0	0	0	0	0
KIT(V559D,V654A)	2	1	3	3	4	0	1	2	0	0	2	0	0	0	0	0	2	3	0	0	0	2	0	0	3	2	0	0	0	3	4	1	1	3	0	3	0	0	0	0	0	0	2	0	0	0	0	0	0
LATS1	0	0	4	0	0	0	4	2	0	0	0	0	0	0	0	0	0	0	0	0	4	0	0	0	3	0	0	0	0	0	4	4	4	4	0	0	0	0	0	0	0	0	0	0	0	0	0	0	0
LATS2	4	0	5	0	0	0	3	0	0	0	0	0	0	0	0	0	0	0	0	0	3	0	0	0	3	0	0	3	0	0	3	4	4	0	0	0	0	0	0	0	0	0	0	0	0	0	0	0	0
LCK	0	3	2	2	4	0	3	0	4	3	1	3	3	0	4	0	3	2	0	0	0	0	2	0	2	0	0	0	3	4	4	4	4	2	4	1	0	0	0	0	0	0	1	3	1	0	0	0	0
LIMK1	0	0	0	0	0	0	0	2	0	0	4	0	0	0	0	0	3	0	2	0	0	0	0	0	0	0	0	0	0	4	5	0	0	3	0	0	0	0	0	0	0	0	0	0	0	0	0	0	0
LIMK2	4	0	0	0	0	0	0	0	0	0	3	0	0	0	0	0	3	0	2	0	0	0	0	4	0	0	0	0	0	0	0	0	0	3	0	0	0	0	0	0	0	0	0	0	0	0	0	0	0
LKB1	0	0	0	0	0	0	4	0	0	0	0	0	0	0	0	0	0	0	0	0	0	0	0	0	2	0	0	0	0	0	4	4	3	3	0	0	0	0	0	0	0	0	0	0	0	0	0	0	0
LOK	3	3	1	3	2	0	3	0	5	0	5	4	2	0	3	0	2	0	1	4	3	0	3	0	2	0	0	0	0	2	1	3	3	2	0	2	0	0	0	0	0	0	0	0	0	0	0	0	0
LTK	3	0	3	3	4	0	0	1	0	0	0	0	4	3	0	0	0	0	0	0	0	0	0	0	3	0	0	0	0	0	4	5	5	4	0	3	0	0	0	0	0	0	0	0	0	0	0	0	0
LYN	0	2	2	3	4	0	4	0	4	0	1	4	4	0	4	0	0	4	0	0	0	0	3	0	3	0	0	0	0	4	4	4	4	3	3	2	0	0	0	0	0	0	1	2	1	0	0	0	0
MAP3K4	0	0	0	0	0	0	4	2	5	0	4	4	0	0	0	0	0	0	0	0	0	0	0	0	0	0	0	0	0	0	5	0	0	3	0	0	0	0	0	0	0	0	0	0	0	0	0	0	0
MAP3K5	0	0	0	0	0	0	0	0	0	0	0	0	0	0	0	0	0	0	0	0	0	0	0	0	0	0	0	0	0	0	4	0	0	0	0	0	0	0	0	0	0	0	0	0	0	0	0	0	0
MAP4K1	4	0	3	0	0	0	2	0	0	0	5	4	0	3	0	0	3	0	1	0	4	0	0	0	3	0	0	0	0	0	3	2	3	2	0	0	0	0	0	0	0	0	0	0	0	0	0	0	0
MAP4K3	4	0	3	0	0	0	3	0	0	0	4	3	0	3	0	0	3	0	2	0	4	0	0	0	2	0	0	0	0	0	3	3	4	2	0	3	0	0	0	0	0	0	0	0	0	0	0	0	0
MAP4K4	0	0	2	0	3	0	3	0	0	0	5	4	0	0	0	0	0	0	0	0	0	0	0	0	3	0	0	0	3	4	3	4	4	3	0	3	0	0	0	0	0	0	0	0	0	0	0	0	0
MAP4K5	4	0	4	2	0	0	3	2	5	0	3	2	0	0	0	0	4	0	2	0	0	3	0	0	3	0	0	0	0	4	3	4	3	2	0	2	0	0	0	0	0	0	0	0	0	0	0	0	0
MAPKAPK2	0	0	0	0	0	0	0	2	0	0	0	0	0	0	0	0	0	0	0	0	0	0	0	0	0	0	0	0	0	0	5	0	0	0	0	0	0	0	0	0	0	0	0	0	0	0	0	0	0
MAPKAPK5	0	0	0	0	0	0	0	0	0	0	0	0	0	0	0	0	0	0	0	0	0	0	0	0	0	0	0	0	0	0	0	0	0	0	0	0	0	0	0	0	0	0	0	0	0	0	0	0	0
MARK1	0	0	0	0	0	0	4	0	0	0	0	5	0	0	0	0	0	0	2	0	0	0	0	0	2	0	0	0	0	0	3	4	5	4	0	0	0	0	0	0	0	0	0	0	0	2	0	0	0
MARK2	0	0	0	0	0	0	4	0	0	0	0	0	0	0	0	0	0	0	2	0	0	0	0	0	2	0	0	0	0	0	2	4	4	3	0	0	0	0	0	0	0	0	0	0	0	0	0	0	0
MARK3	0	0	0	0	0	0	4	0	0	0	0	0	0	0	0	0	4	0	2	0	0	0	0	0	1	0	0	0	0	0	3	4	4	3	0	0	0	0	0	0	0	0	0	0	0	0	0	0	0
MARK4	0	0	0	0	0	0	4	0	0	0	0	0	0	0	0	0	0	0	2	0	0	0	0	0	2	0	0	0	0	0	3	4	5	4	0	0	0	0	0	0	0	0	0	0	0	0	0	0	0
MEK1	0	0	0	0	0	0	3	0	5	0	5	4	0	0	0	0	0	0	2	0	0	0	0	0	0	0	0	0	0	0	3	3	4	3	0	3	0	0	0	0	0	0	0	0	0	0	0	0	0
MEK2	0	0	0	4	0	0	3	0	5	0	5	4	0	0	0	0	0	0	3	0	0	0	0	0	0	0	0	3	3	0	4	3	4	3	0	3	0	0	0	0	0	0	0	0	0	0	0	0	0
MEK3	0	0	0	0	0	0	0	0	0	0	0	0	0	0	0	0	0	0	2	0	0	0	0	0	3	0	0	0	0	0	3	0	0	0	0	0	0	0	0	0	0	0	0	0	0	0	0	0	0
MEK4	0	0	0	0	0	0	0	0	0	0	0	0	0	0	0	0	3	0	2	0	3	0	0	0	3	0	0	0	0	0	4	4	0	0	0	0	0	0	0	0	0	0	0	0	0	0	0	0	0
MEK6	0	0	0	0	0	0	0	0	0	0	0	0	0	0	0	0	4	0	2	0	0	0	0	0	0	0	0	0	0	0	3	5	0	3	0	0	0	0	0	0	0	0	0	0	0	0	0	0	0
MELK	0	0	4	0	0	0	4	0	0	0	0	0	0	0	0	0	0	4	0	0	0	0	0	0	2	0	0	0	0	0	4	4	4	2	0	0	0	0	0	0	0	0	0	0	0	0	0	0	0
MERTK	4	0	4	0	4	3	4	0	0	0	0	4	0	4	0	0	4	0	3	0	0	0	3	0	3	0	0	0	0	4	3	3	3	3	0	3	0	0	0	0	0	0	4	0	0	0	0	0	0
MET	4	0	5	0	0	0	0	0	5	0	0	5	5	0	0	0	0	0	2	0	0	0	0	0	3	0	0	0	0	0	4	0	0	3	0	4	0	0	0	0	0	0	0	5	0	0	0	0	0
MKNK1	4	0	2	0	0	0	0	0	4	0	0	0	4	0	3	0	0	0	0	0	0	0	0	0	0	0	0	0	0	3	4	0	0	0	0	2	0	0	0	0	0	0	0	0	0	0	0	0	0
MKNK2	3	0	2	0	4	3	0	0	5	0	0	0	0	3	4	0	0	0	0	0	0	0	0	0	3	0	0	0	0	2	3	5	0	0	0	3	0	0	0	0	0	0	0	0	0	0	0	0	0
MLCK	0	0	0	0	0	0	1	0	0	0	0	0	0	0	0	0	0	0	0	0	0	0	0	0	0	0	0	0	0	0	4	3	3	1	0	0	0	0	0	0	0	0	0	0	0	0	0	0	0
MLK1	0	0	0	0	0	3	5	0	0	0	0	0	0	3	0	0	3	0	3	0	3	0	0	0	1	0	0	0	0	0	3	5	5	2	0	0	0	0	0	0	0	0	0	0	0	2	0	0	0
MLK2	0	0	0	0	0	0	0	0	0	0	0	0	0	3	0	0	4	0	0	0	0	0	0	0	3	0	0	0	0	0	4	0	0	3	0	0	0	0	0	0	0	0	0	0	0	0	0	0	0
MLK3	0	0	0	0	0	0	4	0	0	0	0	0	0	0	0	0	3	0	0	0	0	0	0	0	1	0	0	0	0	0	3	4	5	3	0	0	0	0	0	0	0	0	0	0	0	0	0	0	0
MRCKA	0	0	0	0	5	0	0	0	0	0	5	0	0	4	0	0	0	0	0	0	0	0	0	4	0	0	0	0	3	0	4	0	0	0	0	3	0	0	0	0	0	0	0	0	0	0	0	0	0
MRCKB	0	0	0	0	4	0	0	0	0	0	5	0	0	3	0	0	0	0	0	0	0	0	0	0	0	0	0	3	3	0	4	0	0	0	0	3	0	0	0	0	0	0	0	0	0	0	0	0	0
MST1	4	0	0	0	0	0	3	0	0	0	0	5	0	0	0	0	0	0	1	0	0	0	0	0	1	0	0	0	0	0	1	3	3	2	0	0	0	0	0	0	0	0	0	0	0	0	0	0	0
MST2	4	0	4	0	0	0	3	0	0	4	0	5	0	4	0	0	0	0	1	0	3	0	0	0	2	0	0	0	0	0	1	3	3	3	0	0	0	0	0	0	0	0	0	0	0	0	0	0	0
MST3	0	0	0	0	0	0	3	0	0	0	0	4	0	0	0	0	0	0	1	0	0	0	0	0	0	0	0	0	0	0	4	3	3	3	0	0	0	0	0	0	0	0	0	0	0	0	0	0	0
MST4	0	0	0	0	0	0	3	0	0	0	5	0	0	0	0	0	0	0	1	0	0	0	0	0	0	0	0	0	0	0	4	4	4	0	0	0	0	0	0	0	0	0	0	0	0	2	0	0	0
MUSK	2	0	2	3	4	0	4	0	0	0	0	0	0	0	0	0	0	0	0	0	0	0	0	0	0	0	0	0	0	2	4	3	4	2	0	0	0	0	0	0	0	0	4	0	0	0	0	0	0
MYLK	0	0	0	0	0	0	4	0	0	0	0	0	0	0	0	0	0	0	2	0	3	0	0	3	3	0	0	0	0	0	3	4	4	0	0	0	0	0	0	0	0	0	0	0	0	0	0	0	0
MYLK2	0	0	4	0	0	0	3	0	0	0	0	5	4	0	4	0	3	0	0	0	0	0	0	0	0	0	0	0	0	0	4	3	3	2	0	0	0	0	0	0	0	0	0	0	0	2	0	0	0
MYO3A	0	0	3	0	0	3	0	0	0	0	0	0	0	0	0	0	0	0	0	0	0	0	0	0	0	0	0	0	0	0	5	0	0	0	0	0	0	0	0	0	0	0	0	0	0	0	0	0	0
MYO3B	0	0	3	0	0	0	0	0	0	0	0	0	0	0	0	0	0	0	0	0	0	0	0	0	0	0	0	0	0	0	5	0	5	0	0	0	0	0	0	0	0	0	0	0	0	0	0	0	0
NDR2	0	0	0	0	0	0	0	0	0	0	0	0	0	0	0	0	0	0	0	0	0	0	0	0	0	0	0	0	0	0	4	4	5	0	0	0	0	0	0	0	0	0	0	0	0	0	0	0	0
NEK1	0	0	0	0	0	0	0	0	0	0	0	5	0	0	0	0	0	0	0	0	0	0	0	0	0	0	0	0	0	0	5	0	0	0	0	0	0	0	0	0	0	0	0	0	0	0	0	0	0
NEK2	0	0	0	0	0	0	4	0	0	0	0	4	0	0	0	0	3	0	0	0	0	0	0	0	0	0	0	0	0	0	5	4	5	0	0	0	0	0	0	0	0	0	0	0	0	0	0	0	0
NEK5	0	0	4	0	0	0	4	0	0	0	0	0	0	0	0	0	0	0	0	0	0	0	0	0	0	0	0	0	0	0	5	0	0	4	0	0	0	0	0	0	0	0	0	0	0	0	0	0	0
NEK6	0	0	0	0	0	0	4	3	0	0	0	0	0	0	0	0	0	0	0	0	0	0	0	0	0	0	0	0	0	0	0	0	0	0	0	0	0	0	0	0	0	0	0	0	0	0	0	0	0
NEK7	0	0	0	0	0	0	4	0	0	0	0	0	0	0	0	0	0	0	0	0	0	0	0	0	0	0	0	0	0	0	0	5	5	0	0	0	0	0	0	0	0	0	0	0	0	0	0	0	0
NEK9	0	0	0	0	0	0	5	0	0	0	0	0	0	0	0	0	0	0	0	0	0	0	0	0	0	0	0	0	0	0	0	0	0	0	0	0	0	0	0	0	0	0	0	0	0	2	0	0	0
NLK	0	0	3	0	4	0	0	0	0	0	4	0	0	0	0	0	4	0	0	0	0	0	0	0	0	0	0	1	1	3	4	0	0	0	0	0	0	0	0	0	0	0	0	0	0	0	0	0	0
p38-alpha	0	0	3	0	1	0	0	0	0	0	3	0	0	0	0	0	0	0	0	0	0	0	0	0	0	0	0	1	1	3	0	0	0	0	1	0	0	0	0	0	0	0	2	0	0	0	0	0	0
p38-beta	0	0	4	0	4	0	0	0	0	0	4	0	0	0	0	0	0	0	0	0	0	0	0	0	0	0	0	1	1	3	0	0	0	0	2	0	0	0	0	0	0	0	4	0	0	0	0	0	0
p38-gamma	0	0	2	0	2	0	0	0	0	0	0	0	0	0	0	0	0	0	0	0	0	0	0	0	0	0	0	3	3	4	4	0	0	0	0	0	0	0	0	0	0	0	0	0	0	0	0	0	0
PAK1	0	0	0	0	0	0	0	0	0	0	0	5	0	0	0	0	0	0	0	0	0	0	0	0	3	0	0	0	0	0	2	0	0	4	0	0	0	0	0	0	0	0	0	0	0	0	0	0	0
PAK2	0	0	0	0	0	0	0	0	0	0	0	0	0	0	0	0	0	0	0	0	0	0	0	0	3	0	0	0	0	0	3	0	0	4	0	0	0	0	0	0	0	0	0	0	0	0	0	0	0
PAK3	0	0	0	0	0	0	4	0	0	0	0	0	0	0	0	0	0	0	2	0	0	0	0	0	2	0	0	0	0	0	3	3	3	3	0	0	0	0	0	0	0	0	0	0	0	0	0	0	0
PAK4	0	0	0	0	0	3	0	0	0	0	0	0	0	0	0	0	0	0	3	0	0	0	0	0	0	0	0	0	0	0	3	0	5	4	0	0	0	0	0	0	0	0	0	0	0	2	0	0	0
PAK6	0	0	0	0	0	0	0	0	0	0	0	0	0	0	0	0	0	0	2	0	0	0	0	0	0	0	0	0	0	0	2	0	5	0	0	0	0	0	0	0	0	0	0	0	0	0	0	0	0
PAK7/PAK5	0	0	0	0	0	0	0	0	0	0	0	0	0	0	0	0	0	0	2	0	0	0	0	0	0	0	0	0	0	0	2	0	4	3	0	0	0	0	0	0	0	0	0	0	0	0	0	0	0
PCTK1	0	0	4	4	0	0	3	0	0	0	0	0	0	2	0	0	3	0	1	0	0	4	0	0	0	0	0	0	0	0	3	4	4	2	0	0	0	0	0	0	0	0	0	0	0	0	0	0	0
PCTK2	0	0	2	0	0	1	4	0	0	0	0	0	0	2	0	0	0	0	2	0	0	0	0	0	0	0	0	0	0	4	4	0	5	0	0	0	0	0	0	0	0	0	0	0	0	0	0	0	0
PCTK3	0	0	3	0	0	1	0	0	0	0	0	0	0	3	0	0	0	0	2	0	0	0	0	0	0	0	0	0	0	0	5	0	5	0	0	0	0	0	0	0	0	0	0	0	0	0	0	0	0
PDGFRA	1	1	2	1	4	0	2	2	5	0	1	0	4	0	0	0	1	2	3	0	0	1	0	0	2	2	0	0	0	2	3	1	2	3	0	2	0	0	0	0	0	0	1	0	0	2	0	0	0
PDGFRB	1	1	2	1	4	0	1	2	5	0	1	0	4	0	0	0	1	2	2	0	0	1	0	0	2	1	0	0	0	2	2	1	1	2	4	2	0	0	0	0	0	0	2	0	0	0	0	0	0
PDPK1	0	0	0	0	0	0	0	0	0	0	0	0	0	0	0	0	0	0	3	0	3	0	0	0	2	0	0	0	0	0	2	5	5	0	0	0	0	0	0	0	0	0	0	0	0	0	0	0	0
PFTK1	0	0	2	0	0	2	0	0	0	0	0	0	0	2	0	0	0	0	3	0	0	0	0	0	0	0	0	0	0	4	4	0	4	0	0	0	0	0	0	0	0	0	0	0	0	0	0	0	0
PHKG1	0	0	0	0	0	3	3	0	0	0	0	5	0	3	4	0	0	0	0	0	4	0	0	0	3	0	0	0	0	0	2	3	2	3	0	3	0	0	0	0	0	0	0	0	0	0	0	0	0
PHKG2	0	0	0	0	0	0	5	0	0	0	0	0	0	3	0	0	0	0	0	0	0	0	0	0	3	0	0	0	0	0	1	3	2	0	0	0	0	0	0	0	0	0	0	0	0	0	0	0	0
PIK3CA	0	0	0	0	0	0	0	0	0	0	0	0	0	0	0	0	0	0	0	0	0	0	0	1	0	0	0	0	0	0	0	0	0	0	0	0	3	4	0	0	0	0	0	0	0	0	0	0	0
PIK3CA(E55K)	0	0	0	0	0	0	0	0	0	0	0	0	0	0	0	0	0	0	0	0	0	0	0	1	0	0	0	0	0	0	0	0	0	0	0	0	3	4	0	0	0	0	0	0	0	0	0	0	0
PIM1	0	0	0	0	0	0	0	0	0	0	0	0	0	2	0	0	0	0	0	0	3	0	0	0	2	0	0	0	0	0	3	0	0	0	0	0	0	0	0	0	0	0	0	0	0	0	0	0	0
PIM2	0	0	0	0	0	0	0	0	0	0	0	0	0	3	0	0	0	0	0	0	3	0	0	0	0	0	0	0	0	0	2	0	0	0	0	0	0	0	0	0	0	0	0	0	0	0	0	0	0
PIM3	0	0	0	0	0	0	0	0	0	0	0	0	0	2	5	0	0	0	0	0	1	0	0	0	2	0	0	0	0	0	2	4	5	0	0	0	0	0	0	0	0	0	0	0	0	0	0	0	0
PIP5K1A	0	0	0	0	0	0	4	0	0	0	0	0	0	0	0	0	0	0	3	0	3	0	0	0	2	0	0	0	0	0	4	3	5	2	0	0	0	0	0	0	0	0	0	0	0	0	0	0	0
PIP5K2B	0	0	0	0	0	0	3	0	0	0	0	5	0	0	0	0	0	0	2	0	3	0	0	0	2	0	0	0	0	0	4	4	3	2	0	0	0	0	0	0	0	0	0	0	0	0	0	0	0
PKAC-alpha	5	0	5	0	0	0	0	0	0	0	0	0	0	0	0	0	0	0	0	0	4	0	0	0	3	0	0	3	0	0	3	0	0	0	0	0	0	0	0	0	0	0	4	0	0	0	0	0	1
PKAC-beta	0	0	3	0	0	0	0	0	0	0	0	0	0	0	0	0	0	0	0	0	4	0	0	0	2	0	0	2	0	0	4	0	0	0	0	0	0	0	0	0	0	0	4	0	0	0	0	0	1
PKMYT1	0	0	0	0	0	0	0	0	0	0	4	5	0	0	0	0	0	0	0	0	0	0	0	0	0	0	0	0	0	0	0	0	0	0	0	0	0	0	0	0	0	0	0	0	0	0	0	0	0
PKN1	0	0	0	0	0	0	3	0	0	2	0	0	0	3	0	0	0	0	0	0	3	0	0	0	1	0	0	0	0	0	2	4	4	3	0	0	0	0	0	0	0	0	0	0	0	0	0	0	0
PKN2	0	0	0	0	0	0	5	0	0	0	0	0	0	0	0	0	0	0	2	0	3	0	0	0	1	0	0	0	0	0	3	5	5	0	0	0	0	0	0	0	0	0	0	0	0	0	0	0	0
PLK1	0	0	0	0	0	0	0	0	0	0	0	0	0	0	0	0	0	0	3	0	0	0	0	0	0	0	0	0	0	0	4	0	0	0	0	0	0	0	0	0	0	0	0	0	0	0	0	0	0
PLK3	5	0	0	0	0	0	0	0	0	0	0	0	0	0	0	0	0	0	3	0	0	0	0	0	0	0	0	0	0	0	5	0	0	0	0	0	0	0	0	0	0	0	0	0	0	2	0	0	0
PLK4	0	0	0	4	0	0	0	0	0	0	0	0	0	0	0	0	3	5	1	0	4	0	2	0	2	0	0	0	0	4	2	3	4	1	0	3	0	0	0	0	0	0	0	0	0	0	0	0	0
PRKCD	0	0	0	0	0	0	0	0	0	0	0	5	0	2	0	0	0	0	3	0	1	0	0	0	2	0	0	0	0	0	2	0	0	0	0	0	0	0	0	0	0	0	0	0	0	0	0	1	0
PRKCE	0	0	0	0	0	0	0	0	0	0	0	0	0	2	0	0	0	0	0	0	1	0	0	0	2	0	0	0	0	0	2	0	0	0	0	0	0	0	0	0	0	0	0	0	0	0	0	1	0
PRKCH	0	0	0	0	0	0	0	0	0	0	0	0	0	2	0	0	0	0	0	0	3	0	0	0	2	0	0	0	0	0	3	0	0	0	0	0	0	0	0	0	0	0	0	0	0	0	0	1	0
PRKCQ	0	0	4	0	0	0	4	0	0	0	0	0	0	2	0	0	0	0	3	0	1	0	0	0	3	0	0	0	0	0	3	5	5	0	0	0	0	0	0	0	0	0	0	0	0	0	0	1	0
PRKD1	0	0	4	0	0	3	0	0	0	0	0	0	0	2	0	0	0	0	3	0	0	0	0	0	0	0	0	0	0	0	4	4	4	0	0	0	0	0	0	0	0	0	0	0	0	1	0	0	0
PRKD2	0	0	4	0	0	3	0	0	0	0	0	0	0	3	0	0	0	0	0	0	3	0	0	0	4	0	0	0	0	0	4	5	4	0	0	0	0	0	0	0	0	0	0	0	0	2	0	0	0
PRKD3	0	0	4	0	0	3	0	0	0	0	0	0	0	2	0	0	0	0	3	0	0	0	0	0	3	0	0	0	0	0	3	5	4	0	0	0	0	0	0	0	0	0	0	0	0	0	0	0	0
PRKG1	0	0	0	0	0	0	0	0	0	0	0	0	0	0	0	0	0	0	0	0	0	0	0	0	2	0	0	0	0	0	4	0	0	0	0	0	0	0	0	0	0	0	0	0	0	0	0	0	0
PRKG2	0	0	0	0	0	0	0	0	0	0	0	0	0	0	0	0	0	0	0	0	4	0	0	0	2	0	0	0	0	0	3	0	0	0	0	0	0	0	0	0	0	0	0	0	0	0	0	0	0
PRKR	0	0	4	0	0	0	4	2	0	0	0	4	4	3	0	0	3	0	3	0	0	0	0	0	4	0	0	0	0	0	5	4	4	0	0	0	0	0	0	0	0	0	0	0	0	0	0	0	0
PRKX	0	0	0	0	0	0	0	0	0	0	0	0	0	0	0	0	0	0	0	0	0	0	0	0	3	0	0	0	0	0	3	0	0	0	0	0	0	0	0	0	0	0	0	0	0	2	0	0	0
PTK2	0	0	0	0	5	0	0	0	0	0	0	0	0	0	0	0	0	0	0	0	0	0	0	0	0	0	0	0	0	0	4	4	4	0	0	0	0	0	0	0	0	0	0	0	0	0	0	0	0
PTK2B	0	0	4	0	4	0	0	0	0	0	0	0	0	0	0	0	0	0	0	0	0	0	3	0	3	0	0	0	0	0	3	4	4	3	0	0	0	0	0	0	0	0	3	0	0	0	0	0	0
PTK6	0	3	0	0	0	0	0	3	5	0	2	0	0	0	0	0	4	0	0	0	0	0	0	0	0	3	0	3	3	0	5	0	0	0	0	2	0	0	0	0	0	0	3	0	0	0	0	0	0
RAF1	0	3	4	0	0	0	0	2	0	0	4	0	0	0	0	0	3	4	0	0	0	0	0	4	0	0	0	3	2	3	0	0	0	0	0	0	0	0	0	0	0	0	0	0	0	2	0	0	0
RET	3	1	2	2	4	0	3	2	5	0	4	0	4	0	0	0	3	0	2	0	0	0	0	0	2	0	0	0	0	1	3	3	3	1	0	1	0	0	0	0	0	0	1	0	0	0	0	0	0
RET(M918T)	3	1	2	2	3	0	2	1	4	0	4	0	3	0	0	0	3	0	3	0	0	0	0	0	2	4	0	0	0	1	4	2	3	1	0	1	0	0	0	0	0	0	1	0	0	0	0	0	0
RIOK1	0	0	0	0	0	0	3	0	0	0	0	0	0	0	0	0	0	0	2	0	3	0	0	0	3	0	0	0	0	0	4	4	3	2	0	0	0	0	0	0	0	0	0	0	0	0	0	0	0
RIOK3	0	0	0	0	0	0	4	0	0	0	0	0	0	0	0	0	0	0	2	0	0	0	0	0	2	0	0	0	0	0	4	5	5	3	0	0	0	0	0	0	0	0	0	0	0	0	0	0	0
RIPK1	4	0	3	0	0	0	3	0	0	0	0	0	0	0	0	0	3	0	2	0	0	0	0	0	0	0	0	0	0	0	0	4	4	1	0	0	0	0	0	0	0	0	0	0	0	0	0	0	0
RIPK2	0	0	4	3	0	0	0	2	4	0	3	0	4	0	4	0	3	0	0	4	0	0	0	0	0	0	0	2	1	3	0	0	0	0	0	1	0	0	0	0	0	0	0	0	0	0	0	0	0
ROS1	0	0	4	0	0	0	0	0	0	0	0	0	0	0	0	0	3	0	0	0	0	0	3	0	2	0	0	0	0	0	4	0	0	3	0	0	0	0	0	0	0	0	0	0	0	2	0	0	0
RPS6KA1(Kin.Dom.1 - N-terminal)	0	0	0	0	0	0	3	0	0	0	0	0	0	3	0	0	0	0	3	0	3	0	0	0	3	0	0	0	0	0	4	3	4	0	0	0	0	0	0	0	0	0	0	0	0	0	0	0	0
RPS6KA1(Kin.Dom.2 - C-terminal)	0	0	0	0	0	0	0	0	5	0	0	0	0	3	0	0	0	0	0	0	0	0	0	0	0	0	0	2	2	0	5	5	5	0	0	2	0	0	0	0	0	0	0	0	0	0	0	0	0
RPS6KA2(Kin.Dom.1 - N-terminal)	0	0	0	0	0	0	3	0	0	0	0	0	0	0	0	0	0	0	2	0	3	0	0	0	3	0	0	0	0	0	3	4	3	3	0	0	0	0	0	0	0	0	0	0	0	0	0	0	0
RPS6KA2(Kin.Dom.2 - C-terminal)	0	0	4	0	0	0	0	0	0	3	0	5	0	3	0	0	0	0	0	0	0	0	0	0	0	0	0	0	0	0	4	5	0	0	0	0	0	0	0	0	0	0	0	0	0	0	0	0	0
RPS6KA3(Kin.Dom.1 - N-terminal)	0	0	0	0	0	0	4	0	0	0	0	0	0	0	0	0	0	0	0	0	4	0	0	0	3	0	0	0	0	0	4	4	4	4	0	0	0	0	0	0	0	0	0	0	0	0	0	0	0
RPS6KA4(Kin.Dom.1 - N-terminal)	5	0	4	0	0	0	3	0	0	0	0	0	0	3	0	0	0	0	3	0	4	0	0	0	2	0	0	0	0	0	4	3	4	0	0	0	0	0	0	0	0	0	0	0	0	0	0	0	0
RPS6KA4(Kin.Dom.2 - C-terminal)	0	0	0	0	0	0	0	0	0	0	0	0	5	0	0	0	0	0	0	0	0	0	0	0	0	0	0	0	0	0	5	4	5	0	0	0	0	0	0	0	0	0	0	0	0	0	0	0	0
RPS6KA5(Kin.Dom.1 - N-terminal)	4	0	4	0	0	0	4	0	0	0	0	0	0	0	0	0	0	0	0	0	3	0	0	0	2	0	0	0	0	0	4	3	3	0	0	0	0	0	0	0	0	0	0	0	0	0	0	0	0
RPS6KA5(Kin.Dom.2 - C-terminal)	0	0	0	0	0	0	0	0	0	0	0	0	0	0	0	0	0	0	0	0	0	0	0	0	0	0	0	0	0	0	5	4	5	0	0	0	0	0	0	0	0	0	0	0	0	0	0	0	0
RPS6KA6(Kin.Dom.1 - N-terminal)	0	0	0	0	0	0	4	0	0	0	0	0	0	0	0	0	0	0	0	0	3	0	0	0	3	0	0	0	0	0	3	5	5	0	0	0	0	0	0	0	0	0	0	0	0	0	0	0	0
RPS6KA6(Kin.Dom.2 - C-terminal)	0	0	5	0	0	0	0	0	0	3	0	0	0	3	0	0	0	0	0	0	0	0	0	0	0	0	0	2	2	4	0	0	0	0	0	2	0	0	0	0	0	0	0	0	0	0	0	0	0
SgK085	0	0	0	0	0	0	3	0	0	0	0	0	0	0	0	0	0	0	0	0	0	0	0	0	3	0	0	0	0	0	5	3	3	3	0	0	0	0	0	0	0	0	0	0	0	0	0	0	0
SLK	3	3	2	0	3	0	3	2	5	0	4	4	2	0	4	0	0	0	1	0	3	0	0	0	2	0	0	3	3	3	1	4	3	2	0	2	0	0	0	0	0	0	0	0	0	0	0	0	0
SNARK	0	0	0	0	0	3	3	0	0	3	0	5	0	3	0	0	0	0	1	0	3	0	0	0	2	0	0	0	0	0	1	4	4	3	0	0	0	0	0	0	0	0	0	0	0	0	0	0	0
SNF1LK	0	0	4	0	0	0	0	0	0	0	2	0	0	0	0	0	4	0	3	0	0	0	3	0	2	0	0	0	0	0	2	5	5	3	0	3	0	0	0	0	0	0	0	0	0	0	0	0	0
SNF1LK2	0	0	0	0	0	0	4	0	5	0	2	5	0	0	4	0	4	0	2	0	0	0	0	0	2	0	0	0	0	0	2	4	4	3	0	2	0	0	0	0	0	0	0	0	0	0	0	0	0
SRC	0	0	4	0	0	0	4	2	4	0	1	4	4	0	4	0	4	0	0	0	0	0	3	0	3	0	0	0	3	0	4	5	5	2	4	2	0	0	0	0	0	0	2	3	0	0	0	0	0
SRMS	0	0	3	4	0	0	0	0	5	0	3	0	0	3	0	0	4	0	0	0	0	0	0	0	0	0	0	0	0	4	5	3	0	0	0	3	0	0	0	0	0	0	0	0	0	0	0	0	0
SRPK1	0	0	0	0	0	0	3	0	0	0	0	0	0	0	0	0	0	0	3	0	0	0	0	0	1	0	0	0	0	0	3	5	4	2	0	0	0	0	0	0	0	0	0	0	0	0	0	0	0
SRPK2	0	0	0	0	0	0	3	0	0	0	0	0	0	0	0	0	0	0	0	0	0	0	0	0	2	0	0	0	0	0	4	3	4	3	0	0	0	0	0	0	0	0	0	0	0	0	0	0	0
STK16	0	0	0	0	0	0	0	0	0	0	0	0	0	0	0	0	3	0	1	0	0	0	0	0	2	0	0	0	0	0	5	4	4	3	0	0	0	0	0	0	0	0	0	0	0	0	0	0	0
STK33	4	0	4	0	0	0	0	0	0	0	0	5	0	3	0	0	0	0	0	0	4	0	0	0	0	0	0	0	0	4	2	3	3	0	0	3	0	0	0	0	0	0	0	0	0	0	0	0	0
STK36	0	0	4	4	0	2	0	0	5	0	4	5	0	0	0	0	3	0	0	0	0	0	0	0	0	0	0	2	3	4	0	0	0	0	0	0	0	0	0	0	0	0	0	0	0	0	0	0	0
SYK	0	0	4	0	0	0	0	0	0	0	0	5	0	0	0	0	0	0	2	0	0	0	0	0	2	0	0	0	0	0	3	0	0	3	0	0	0	0	0	0	0	0	0	0	0	2	0	0	0
TEC	0	0	0	0	0	0	0	0	5	0	3	0	0	0	0	0	0	0	2	0	0	0	3	0	0	0	0	0	0	0	5	0	0	0	0	0	0	0	0	0	0	0	0	0	0	0	0	0	0
TESK1	0	0	4	0	0	0	0	0	5	0	3	0	0	0	0	0	0	0	3	0	0	0	0	0	0	0	0	0	0	0	5	0	0	4	0	3	0	0	0	0	0	0	0	0	0	0	0	0	0
TGFBR1	0	0	0	0	0	0	0	0	5	0	4	0	0	0	0	0	0	0	0	0	0	0	0	0	0	0	0	0	3	0	5	0	0	0	0	0	0	0	0	0	0	0	0	0	0	0	0	0	0
TGFBR2	0	0	3	0	0	3	0	0	4	0	5	0	0	3	0	0	0	0	0	0	0	0	0	0	0	0	0	0	3	0	0	0	0	0	0	0	0	0	0	0	0	0	0	0	0	0	0	0	0
TIE1	3	0	1	2	2	0	4	2	5	0	0	4	4	0	0	0	3	0	2	0	0	0	3	0	3	0	0	0	0	2	4	0	0	2	0	3	0	0	0	0	0	0	0	0	0	0	0	0	0
TIE2	3	0	2	3	2	0	0	2	0	0	0	0	0	0	0	0	0	0	2	0	0	0	2	0	3	0	0	0	0	4	4	0	0	3	0	3	0	0	0	0	0	0	3	0	0	0	0	0	0
TLK1	0	0	0	0	0	0	0	0	0	0	0	0	0	0	0	0	0	0	2	0	0	0	0	0	0	0	0	0	0	0	4	4	4	0	0	0	0	0	0	0	0	0	0	0	0	0	0	0	0
TLK2	0	0	0	0	0	0	4	0	0	0	0	0	0	0	0	0	0	0	2	0	0	0	0	0	0	0	0	0	0	0	3	4	4	0	0	0	0	0	0	0	0	0	0	0	0	0	0	0	0
TNIK	0	0	3	0	3	0	2	3	0	0	5	3	0	0	0	0	3	0	0	0	0	0	0	0	3	0	0	3	2	0	3	3	3	3	0	3	0	0	0	0	0	0	0	0	0	0	0	0	0
TNK1	0	0	3	0	0	0	0	0	0	3	0	0	4	0	0	0	0	0	2	0	0	0	3	0	2	0	0	0	0	4	3	4	4	2	0	0	0	0	0	0	0	0	0	0	0	0	0	0	0
TNK2	0	0	0	0	0	0	0	0	0	0	2	5	0	0	0	0	0	0	0	0	0	0	0	0	2	0	0	0	0	0	3	5	0	4	0	0	0	0	0	0	0	0	0	0	0	0	0	0	0
TNNI3K	0	2	3	0	0	0	0	3	5	0	3	5	4	1	0	0	0	4	2	0	0	0	0	0	0	0	0	0	3	3	5	0	0	0	0	3	0	0	0	0	0	0	0	0	0	0	0	0	0
TRKA	4	0	4	0	4	0	3	0	0	0	0	0	0	0	0	3	0	0	0	0	0	3	0	0	2	0	0	0	0	4	3	4	4	1	0	0	0	0	0	0	0	0	3	0	0	2	0	0	0
TRKB	4	0	3	0	4	0	4	0	0	0	0	0	0	0	0	2	0	0	0	0	0	3	0	0	2	0	0	0	0	4	3	4	4	2	0	0	0	0	0	0	0	0	3	0	0	2	0	0	0
TRKC	3	0	3	0	3	0	3	0	0	0	0	0	0	0	0	2	0	0	0	0	0	3	0	0	3	0	0	0	0	3	3	3	5	2	0	0	0	0	0	0	0	0	3	0	0	0	0	0	0
TSSK1	0	0	0	0	0	0	0	0	0	0	0	0	0	0	0	0	0	0	0	0	0	0	0	0	3	0	0	0	0	0	3	0	5	0	0	0	0	0	0	0	0	0	0	0	0	2	0	0	0
TTK	0	0	3	4	4	0	0	0	0	0	0	0	0	0	0	0	2	0	1	0	0	0	0	0	2	0	1	3	3	4	4	3	3	0	0	0	0	0	0	0	0	0	0	0	0	0	0	0	0
TXK	0	0	0	0	0	0	0	0	4	0	2	5	0	0	5	0	4	0	0	0	0	0	0	0	0	0	0	0	3	0	4	0	0	3	0	3	0	0	0	0	0	0	0	0	0	0	0	0	0
TYK2(Kin.Dom.2/JH1 - catalytic)	0	0	4	0	0	0	0	0	0	3	0	0	0	0	0	0	0	0	1	0	0	0	0	0	2	0	0	0	0	0	4	5	5	0	0	0	0	0	1	0	0	0	4	0	0	1	0	0	0
TYRO3	0	0	0	0	0	0	5	0	4	0	0	5	5	0	0	0	0	0	0	0	0	0	3	0	0	0	0	0	0	0	5	4	3	0	0	2	0	0	0	0	0	0	0	0	0	0	0	0	0
VEGFR2	2	1	3	3	5	0	3	2	0	0	0	0	0	0	0	0	1	0	3	0	0	0	0	0	3	2	0	0	0	2	4	1	2	3	0	3	0	0	0	0	0	0	2	0	0	2	0	0	0
WEE1	0	0	0	0	0	0	4	0	0	0	5	4	0	0	0	0	0	0	0	0	0	0	0	0	0	0	0	0	0	0	5	5	5	3	0	0	0	0	0	0	0	0	0	0	0	0	0	0	0
YANK2	3	0	0	0	0	0	0	0	0	0	0	5	0	0	0	0	0	0	0	0	0	0	0	0	0	0	0	3	3	0	4	0	0	0	0	0	0	0	0	0	0	0	0	0	0	0	0	0	0
YANK3	0	0	0	0	0	0	0	0	0	0	0	0	0	0	0	0	0	0	0	0	0	0	0	0	0	0	0	0	0	0	5	0	0	0	0	0	0	0	0	0	0	0	0	0	0	0	0	0	0
YES	0	0	3	3	5	0	3	2	5	0	1	4	4	0	0	0	4	0	0	0	0	0	2	0	3	0	0	0	0	0	4	4	4	3	3	2	0	0	0	0	0	0	1	2	0	0	0	0	0
YSK1	0	0	4	0	0	0	4	0	0	0	0	5	0	0	0	0	0	0	2	0	0	0	0	0	3	0	0	0	0	0	4	4	4	4	0	0	0	0	0	0	0	0	0	0	0	0	0	0	0
ZAK	0	1	1	3	4	0	0	1	4	0	3	4	0	0	0	0	0	4	0	0	0	0	0	0	0	3	0	0	3	1	0	0	0	3	0	4	0	0	0	0	0	0	0	0	0	0	0	0	0
ZAP70	0	0	0	0	0	0	0	0	0	0	0	0	0	0	0	0	0	0	0	0	0	0	0	0	3	0	0	0	0	0	4	0	0	0	0	0	0	0	0	0	0	0	0	0	0	0	0	0	0
PRKCA	0	0	0	0	0	0	0	5	0	0	0	0	0	0	0	0	0	0	5	0	0	0	0	0	0	0	4	0	5	0	0	0	0	0	0	0	0	0	0	0	0	0	0	0	0	0	0	1	0
PRKCB	0	0	0	0	0	0	0	5	0	0	0	0	0	0	0	0	0	0	5	0	0	0	0	0	0	0	4	0	5	0	0	0	0	0	0	0	0	0	0	0	0	0	0	0	0	0	0	1	0
PIK3CB	0	0	0	0	0	0	0	0	0	0	0	0	0	0	0	0	0	0	0	0	0	0	0	0	0	0	0	0	0	0	0	0	0	0	0	0	3	4	0	0	0	0	0	0	0	0	0	0	0
PIK3CD	0	0	0	0	0	0	0	0	0	0	0	0	0	0	0	0	0	0	0	0	0	0	0	0	0	0	0	0	0	0	0	0	0	0	0	0	1	2	0	0	0	0	0	0	0	0	0	0	0
PIK3CG	0	0	0	0	0	0	0	0	0	0	0	0	0	0	0	0	0	0	0	0	0	0	0	0	0	0	0	0	0	0	0	0	0	0	0	0	2	3	0	0	0	0	0	0	0	0	0	0	0
[truncated: 16 more columns]
