# Supplementary material for: Kinase Pathway Dependence in Primary Human Leukemias Determined by Rapid Inhibitor Screening
Source: Oxford University Press journal article supplement (doi:10.1158/0008-5472.can-12-1906), 2012-10-19
Supplement: 00085472can121906-sup-t4_xls_552k.xls [file 00085472can121906-sup-t4_xls_552k.xls]

## Sheet: Sheet1
Drug	dose(nM)	09076	09157	09437	09613	10199	07326	08054	08115	08118	08169	08186	08426	09141	09142	09177	09182	09190	09199	09255	09291	09338	09562	09565	09577	09638	09683	09684	09698	09699	09765	09767	09776	09798	09811	09812	10019	07335	07352	07354	08024	08027	08076	08102	08116	08195	09145	09160	09256
ABT-869	10000	0.343776	0.806916	0.731738	0.304054	0.562121	0	0.342189	0.757377	0.924359	0.537815	0.288503	0.827372	0.251196	0.663507	0.32	0.336898	0.952152	1.15737	0.636364	0.225806	0.303366	0.241758	0.422961	0.0753311	0.41226	0.0962199	0.712936	0.0642623	0.264151	0.0857843	0.42623	0.0928502	0.584986	-0.17973	-0.182495	0.454432	-0.0143737	0.150718	0.273954	0.197601	0.446367	0.223926	0.154145	0.0826146	0.153215	0.214004	0.296758	0.182708
ABT-869	1000	1.0254	0.907781	0.775819	0.831081	1.00227	0.745902	0.914984	1.06721	1.88462	1.37815	0.440347	1.01244	0.640085	1.19431	1.32	0.471658	1.10803	1.50598	1.03704	0.760611	0.700323	0.401099	0.824773	0.544702	1.20733	0.817869	0.853799	0.440656	0.247642	0.777778	0.763466	0.740537	0.783286	0.567568	1.04283	0.7603	0.629249	0.831041	0.897436	0.973183	1.03114	0.5	0.933938	0.460735	0.666484	0.660421	1.00374	0.609027
ABT-869	100	1.30398	1.0611	0.952141	0.945946	1.08182	0.803279	1.10096	0.97541	1.22051	1.09244	1.07809	1.2084	0.900585	0.862559	1.64	0.62139	1.02377	1.1992	0.777778	0.65365	0.974643	0.857143	0.824773	0.625828	1.11058	0.697595	0.859548	0.532459	0.313679	0.81781	0.943794	0.699774	0.922096	0.614865	1.2905	0.838951	0.750627	1.01316	0.991903	0.711362	0.937716	0.812883	0.598446	0.670449	0.829275	0.858317	1.0212	0.529092
ABT-869	10	1.23285	1.02882	1.25189	1.2973	0.922727	1.03279	1.1084	0.803279	0.996154	0.94958	1.12364	1.15397	1.01037	1.42654	1.4	0.943316	1.10803	1.1504	1.03704	1.29542	0.916551	1.64835	1.15257	0.724338	1.10216	0.721649	0.922793	0.936393	0.676887	1.00082	0.814988	1.02362	1.20963	0.927027	1.05587	1.37203	0.86402	0.965012	0.982456	0.696542	0.99308	1.10429	0.879534	0.816614	1.01122	1.00099	1.09975	0.924959
AG490	100000	0.911373	1.13127	1.8317	1.96218	1.17032	5.72081	1.38127	3.27038	1.82019	1.87518	4.43098	1.75283	0.403247	7.13333	6.2968	0.985915	0.667456	1.90249	5.16162	2.01515	0.688469	1.48758	2.16447	1.59172	1.38204	5.27652	1.40299	0.788258	3.50731	1.54173	0.780105	1.36189	2.8308	1.85073	2.19629	2.19506	0.371442	0.53636	2.13323	1.07825	1.11524	0.810158	1.19441	0.40911	0.626424	0.484664	1.44142	0.865468
AG490	50000	0.944314	1.03861	1.50491	1.35484	0.907001	3.4467	1.17837	1.96223	1.35546	1.24684	2.47475	1.25525	0.687353	4.9	3.64384	1.02817	0.829138	1.45954	3.53535	1.60152	0.705426	1.17203	1.47368	0.994083	1.26882	3.12879	0.905473	0.852262	1.87056	0.789799	0.759162	0.843557	1.42132	1.18829	1.67697	1.27037	0.793897	0.879035	1.6294	0.968699	1.10882	1.02873	1.05734	0.758058	1.01139	1.01397	1.31716	1.18954
AG490	25000	1.11451	1.139	0.971744	1.06674	0.819227	2.13198	1.0301	1.50298	1.17151	0.97195	1.64983	1.33441	0.866981	3.23333	2.33333	1.03521	1.12348	1.36515	2.72222	1.61212	0.651163	0.850046	1.24342	0.686391	1.26102	1.80303	0.830846	0.939846	1.08142	0.638331	0.790576	0.630127	1.01861	1.10634	1.19011	0.967901	0.915054	0.99326	1.18989	0.836079	1.02204	1.10741	1.17972	1.08896	0.915718	1.116	1.11006	1.3268
AG490	12500	1.15294	0.992278	0.902948	0.965517	0.907001	1.45685	0.998885	1.0994	1.08437	0.913043	1.53199	0.904685	0.927468	2.7	1.56621	1.25352	1.18567	0.958506	1.87374	1.11364	0.729167	0.824287	1.05921	0.668639	1.19074	1.37879	0.840796	1.06785	0.964509	0.757342	0.806283	0.57677	1.05415	1.06537	1.08192	0.916049	0.948531	0.978361	1.11485	0.928336	1.0124	0.982098	1.14545	1.18221	0.91344	0.999089	1.18462	1.1476
AKT IV	25000	0.151123	0.0427778	0.141509	0.0209163	0.293843	-0.0804598	0.230263	0.198257	0.0758808	0.160229	0.189189	0.15864	0.0323286	0.292776	-0.528302	0.0295983	-0.00211929	-0.107338	0	0.291667	-0.0419162	0.628952	0.360958	0.336751	0.0574713	-0.944079	0.234568	-0.187974	0.115023	0.121528	0.114145	0.141958	0.200573	-0.184211	-0.0689346	0.812346	-0.0997701	0.0241796	-0.0101597	0	0	-0.00776627	0.0195531	0.0696933	0.0392562	0.0176723	-0.00774336	0.0717131
AKT IV	5000	0.0846287	0.0194444	0.00943396	0.0557769	0.215485	-0.16092	0.147368	0.122004	0.0474255	0.110157	0.130977	0.0892351	0.010209	-0.212928	-0.484277	0.0369979	0.0190736	0.00766703	0.411765	0.152778	-0.0454092	0.663894	0.244936	0.204259	0.0344828	-0.138158	0.037037	-0.220665	-0.443662	0.0194444	0.148654	-0.0758741	-0.30086	-0.280702	-0.188004	0.518519	-0.0868966	0.0503742	0.0507983	0.0754039	0.0167946	-0.00776627	0	0.0641179	0.0557851	0.0176723	0.0154867	0.0278884
AKT IV	1000	0.392919	0.303333	0.584906	0.299801	0.359142	0.321839	0.0368421	0.28976	0.123306	0.180258	0.218295	0.1983	0.175255	0	0.132075	0.125793	0.103845	0.20701	0.253394	0.708333	-0.0209581	0.832779	0.734807	0.496845	0.628352	-0.0690789	0.277778	0.0081728	-0.328638	0.0972222	0.544179	0.281469	0	-0.140351	-0.0626679	0.691358	0.0386207	0.267991	0.0203193	0.534111	0.463532	0.434911	0.680447	0.217443	0.159091	0.2103	0.147124	0.0916335
AKT IV	200	1.43869	0.878889	0.839623	0.962151	0.907649	0.885057	0.561842	0.854031	0.398374	0.58083	0.654886	0.535411	0.860963	1.19772	1.49686	0.651163	0.940963	1.11939	0.855204	0.875	0.174651	1.10649	1.50829	0.910883	1.4023	0.483553	0.858025	0.604787	-0.213615	0.7875	1.10163	0.687762	0.481375	0.27193	0.282005	0.846914	0.962299	0.836212	0.782293	0.672352	0.809501	0.789571	0.692179	0.674632	0.830579	0.837667	0.96792	0.928287
AKT X	50000	-0.0604491	-0.0233333	0.00943396	0.00697211	0.0391791	0	-0.101316	0.0152505	0.0189702	-0.0801144	-0.0873181	0.029745	-0.0153136	-0.718631	-1.49686	-0.0813953	-0.0275507	-0.199343	-0.221719	-0.138889	-0.0628743	0.695923	0.425414	0.369874	-0.0804598	-0.667763	-0.117284	-0.253357	-0.312207	-0.126389	-0.00796359	-0.141958	-0.361032	-0.438596	-0.401074	0.751852	0.745057	0.900691	0.203193	-0.0628366	-0.0369482	-0.0207101	-0.00391061	0	0.0103306	-0.00883615	-0.0774336	-0.0199203
AKT X	10000	0.556131	0.466667	0.716981	0.26494	1.0709	0.804598	0.156579	0.0152505	0.151762	0.370529	0.305613	0.0793201	0.299465	-0.239544	-0.352201	0.0443975	0.62307	0.153341	0.126697	0.0277778	0.188623	0.835691	0.953959	0.888801	0.180077	-0.230263	0.0802469	0.277875	-0.213615	-0.0875	0.536215	-0.0293706	0.200573	0.166667	0.119069	0.665432	0.798161	0.967185	0.812772	0.333034	0.644914	0.924186	1.08715	0.671844	0.797521	0.926029	0.565265	0.577689
AKT X	2000	1.31779	0.882778	0.726415	1.19223	0.829291	1.12644	0.617105	0.686275	1.07182	0.86123	0.611227	0.654391	0.964754	0.665399	0.528302	0.895349	0.97911	0.90471	0.538462	1.02778	0.862774	1.05699	1.54696	0.855678	1.12261	0.598684	0.722222	1.01751	0.443662	0.665972	1.13349	0.496853	0.401146	0.868421	0.457475	0.812346	0.893103	0.975245	0.995646	0.615799	0.947217	0.644601	0.754749	0.928315	0.971074	0.862408	0.859513	0.968127
AKT X	400	1.69257	0.960556	0.839623	1.09462	0.901119	0.804598	1.28947	1.37255	1.01491	0.941345	0.742204	1.02125	0.95965	0.479087	2.28931	1.42812	0.991826	1.13472	0.855204	1	0.852295	1.03078	1.46961	0.894322	1.12261	0.828947	0.925926	1.05838	0.410798	0.806944	1.07509	0.687762	0.441261	0.833333	0.52641	0.855556	0.978391	0.94099	0.975327	0.923698	0.957294	0.864645	0.821229	0.83632	0.964876	0.957839	0.998894	1.15936
AMG-706	10000	0.895004	0.532565	0.767003	1.30405	0.922727	1.95082	0.743889	0.952459	1.13974	0.596639	0.986985	0.903577	0.794524	1.02844	0.48	0.314439	0.901595	2.39841	0.636364	0.499151	0.535731	0.527473	0.634441	0.475166	0.975962	0.264605	0.73306	0.371803	0.115566	0.554739	0.592506	0.726949	0.763456	0.728378	0.221601	0.66417	0.610084	0.747309	0.850202	0.770642	1.19377	0.953988	0.131477	0.384476	0.714364	0.90664	1.04738	0.220772
AMG-706	1000	1.221	0.863401	1.03149	1.18919	0.710606	0.745902	0.989373	0.895082	1.0141	0.907563	0.986985	1.26283	0.729399	0.962085	1.08	0.456684	0.97743	1.28287	0.895623	0.962649	0.742278	0.983516	0.592145	0.59106	1.08113	0.817869	0.850924	0.537049	0.132075	0.920752	0.763466	0.760919	0.733711	0.974324	0.547486	0.690387	0.779375	0.885467	0.784076	0.829922	0.899654	0.883436	0.489637	0.737177	0.781395	0.711045	0.995012	0.388254
AMG-706	100	1.42845	0.984438	0.925693	1.60135	1.06591	0.860656	1.02657	0.963934	1.32821	0.87395	0.926247	1.36081	0.898724	1.06161	1.76	0.606417	1.00481	1.14343	0.683502	1.10526	0.987552	1.26923	0.835347	0.822848	1.11058	0.62543	0.853799	0.578361	0.181604	0.846405	0.925059	0.663539	0.882436	0.974324	1.13408	0.725343	0.765001	1.02153	1.04858	1.31898	0.889273	1.04601	0.811528	0.826146	0.911628	0.872124	0.942643	0.727026
AMG-706	10	1.43438	1.0611	1.40176	2.06081	0.965152	1.09016	1.00425	1.11311	1.39103	1.05882	1.27549	1.31726	0.984317	1.39336	1.6	0.845989	1.07433	1.21315	1.08418	1.20034	1.29092	2.43956	1.35347	0.863411	1.13161	1.13058	0.965914	1.33115	0.660377	1.06373	0.805621	1.07797	1.26912	1.25811	1.16015	1.45943	1.0397	1.06758	0.925776	1.10162	1.02422	1.00307	1.07448	0.873808	1.04761	1.22419	1.16085	1.13431
AMPK	10000	0.96114	0.91	0.726415	0.488048	0.999067	2.01149	0.644737	0.228758	0.350949	0.851216	0.582121	0.11898	0.100389	-0.106464	0.352201	0.110994	0.421738	0.77437	0.506787	0.472222	0.213074	0.634775	0.786372	0.474763	0.804598	0.621711	0.481481	0.420899	0.361502	0.622222	0.926432	0.631469	-0.100287	0.236842	-0.150403	0.639506	-0.0547126	0.128958	0.0203193	0.63465	0.440019	0.0698964	0.0586592	0.18399	0.0847107	0.0406463	0.201327	0.0876494
AMPK	1000	1.74093	1.11611	0.933962	0.752988	0.750933	0.804598	1.07763	0.579521	0.749322	1.18169	0.800416	0.713881	0.753768	0.532319	1.36478	0.488372	0.996064	1.3954	0.791855	1.20833	0.750998	0.748336	1.37937	0.529968	1.14559	0.805921	0.728395	0.600701	0.624413	0.7875	1.01934	0.993706	0.581662	0.666667	0.520143	0.74321	0.658161	0.842257	0.782293	0.609515	1.01104	0.851701	0.590503	0.769415	0.774793	0.979046	1.09956	0.442231
AMPK	100	0.93696	0.921667	1.0566	1.24801	1.09049	1.12644	1.03158	1.05229	0.98645	1.18169	0.858628	1.19972	0.990277	1.27757	1.93711	0.584567	1.10839	1.11172	0.823529	1.58333	0.782435	1.07446	1.52118	0.706625	1.19923	0.805921	0.876543	0.751897	0.42723	0.330556	1.10163	1.03042	0.902579	0.894737	0.589078	0.734568	0.811034	0.94905	0.914369	0.691203	1.08157	0.926775	0.836872	0.77499	0.946281	0.943701	1.3396	0.972112
AMPK	10	1.43869	1.12389	1.27358	1.56873	1.35168	1.77011	1.12368	1.03704	1.35637	1.2618	0.931393	1.16006	1.02261	1.3308	1.76101	0.917548	1.04481	1.15005	1.23529	1.20833	1.01297	1.09193	1.76611	0.932965	1.07663	1.10526	0.919753	0.772329	0.985915	0.889583	1.14145	1.20909	3.9914	2.59649	0.820949	0.916049	0.683908	1.07599	0.975327	0.722621	1.13868	1.1054	0.930726	0.841896	0.958678	1.06741	1.5177	1.19522
AP24534	1000	0.302286	0.24611	0.670025	0.952703	0.509091	1.14754	0.0520723	0.516393	1.31026	0.361345	0.455531	0.250389	0.0651249	0.796209	-0.12	0.366845	0.547698	0.244024	0.306397	0.820034	0.235592	0.357143	0.391239	0.469371	1.22416	0.4811	0.799179	0.229508	0.676887	0.737745	0.421546	0.50275	0.971671	0.227027	0.195531	0.856429	-0.0926306	0.090012	0.415655	-0.00988003	-0.00692042	0.110429	0.117876	0.117567	0.122572	0.078238	0.506234	0.0875476
AP24534	100	0.889077	0.500288	0.670025	0.567568	0.551515	0.803279	0.453773	0.654098	0.529487	0.672269	0.941432	0.762053	0.753589	1.19431	0.24	0.479144	0.882636	1.07371	0.542088	0.867572	0.580913	0.263736	0.539275	0.567881	1.04748	0.43299	0.78768	0.472787	0.462264	0.629085	0.648712	0.394047	0.654391	0.605405	0.599628	0.646692	0.528633	0.378888	0.755735	0.14326	0.0795848	0.41411	0.154145	0.911938	0.871409	1.14135	1.00374	0.14845
AP24534	10	1.01355	0.689914	0.828715	0.567568	0.477273	0.688525	0.773645	0.918033	0.637179	0.89916	0.86551	0.762053	1.06805	1.06161	1.04	0.628877	1.04273	1.30378	0.589226	0.65365	0.687414	0.489011	0.719033	0.683775	0.912861	0.264605	0.879671	0.872131	0.59434	0.60049	0.711944	0.389518	0.684136	0.794595	1.19926	0.812734	0.782569	0.875	1.0108	0.296401	0.83391	0.812883	0.829663	1.09941	1.07059	1.31624	1.0212	0.734638
AP24534	1	0.972058	0.746398	1.24307	0.702703	0.662879	0.688525	0.885228	0.952459	0.807692	1.0084	0.698482	0.92535	1.05502	1.72512	1	1.0107	1.04484	1.26892	0.754209	0.665535	0.658368	0.884615	0.835347	0.805464	1.04748	0.865979	0.922793	1.05574	0.627358	0.697712	0.700234	0.550307	0.743626	0.964865	1.04283	0.803995	0.814511	0.925239	1.02969	0.355681	0.982699	0.840491	1.3057	1.0168	1.03995	1.10224	0.986284	0.841218
AST-487	10000	0.0713725	0.100386	0.120393	0.0311457	0.0512017	1.17259	0.0702341	0.139165	0.300138	0.088359	0.329966	0.0339257	0.0403247	-0.166667	-0.0319635	0.0352113	0.0145099	0.00726141	0.0707071	0.40303	0.0271318	0.167433	0.126645	0.414201	0.0585611	-0.583333	0.363184	0.0572666	0.394572	0.216383	0.136126	0.271869	0.521151	0.300488	0.357032	0.751852	0.00159417	0.0471799	0.0321593	0.392092	0.0835629	0.11657	0.117483	0.0992694	0.166287	0.0233829	0.132544	0.0610022
AST-487	1000	1.26275	0.416988	0.773956	0.443826	1.22884	0.568528	1.11594	0.27833	1.53942	0.539972	0.117845	0.633279	0.82299	0.733333	1.34247	0.577465	1.04679	2.96992	1.13131	1.17727	0.993702	0.23827	0.736842	0.656805	1.11266	0.397727	0.542289	0.485082	1.00835	1.15765	0.604712	1.22468	0.663283	0.484878	0.443586	0.665432	0.00159417	0.238382	0.88974	0.415157	1.1281	0.743131	0.137063	0.373012	0.300683	1.05648	1.33373	0.209695
AST-487	100	1.24078	0.544402	0.980344	0.949944	1.14838	0.568528	0.850613	0.626243	0.793914	0.697055	1.01347	0.802908	0.907306	0.533333	0.767123	0.485915	1.04679	1.4305	1.02525	1.08182	0.793605	0.283349	0.898026	0.473373	1.15951	0.742424	0.716418	0.522137	0.920668	0.843895	0.848168	0.97314	0.615905	0.587317	0.876352	0.812346	0.510134	0.330259	1.15773	0.524712	1.06703	0.469192	0.538462	0.577568	0.578588	0.812026	1.11834	0.388889
AST-487	10	0.856471	0.791506	0.885749	1.22247	1.03135	0.532995	1.10814	1.0159	0.793914	0.785414	1.15488	0.723748	0.953129	1.36667	0.671233	0.556338	1.02399	1.18361	0.848485	0.901515	0.810562	0.379945	1.16283	0.213018	1.15951	0.875	0.771144	0.606352	0.832985	1.02241	0.95288	0.739383	1.61083	0.641951	1.00618	0.855556	0.808244	0.841788	0.975498	0.461285	1.0124	0.617818	0.851748	0.788139	0.790433	0.86942	1.0355	0.747277
AZD-1152	10000	1.09653	0.806916	0.846348	1.06757	0.742424	0.803279	0.691817	0.791803	1.02308	0.89916	1.12364	1.19751	0.969431	0.763033	0.68	0.516578	0.541378	0.997012	0.895623	0.499151	0.564776	0.401099	0.26435	0.556291	1.14844	-2.30928	0.615195	0.344262	-0.0165094	0.0857843	0.838407	0.348754	-0.23796	-0.378378	-1.27747	0.00873908	0.455168	0.726376	0.991903	0.360621	0.799308	0.423313	0.911269	0.822969	0.869494	0.651216	0.86409	0.521479
AZD-1152	1000	1.05504	0.883573	0.916877	0.810811	0.710606	0.631148	0.691817	1.05574	1.05	0.848739	1.03254	1.08865	0.969431	1.19431	1.04	0.591444	0.714114	1.25498	0.872054	0.808149	0.622868	0.67033	0.729607	0.631623	0.992788	-1.15464	0.638193	0.518689	0.29717	0.257353	0.875878	0.110967	-0.287535	-0.539189	-1.55121	0.0174782	0.501483	0.734749	0.935223	0.405081	0.871972	0.871166	1.06541	0.768951	0.926949	1.00559	0.925187	0.787928
AZD-1152	100	1.84335	0.996542	1.45466	0.986486	0.890909	0.803279	0.870351	1.12459	1.22949	0.823529	0.880694	1.52411	1.00851	1.12796	1.56	0.73369	0.910021	1.19223	0.73064	1.02207	0.913324	0.978022	1.00453	0.805464	0.933894	-2.16495	0.5577	0.325902	0.990566	0.371732	0.812646	0.0475574	-0.11898	-0.548649	-1.32961	0.0262172	0.57974	0.732656	1.0108	1.04234	1.00692	0.828221	1.02008	0.892873	0.997811	0.973373	0.986284	1.20663
AZD-1152	10	1.55292	0.883573	1.11083	1.14189	0.875	0.745902	0.989373	1.02131	1.02308	0.991597	1.1692	1.23017	0.961988	1.99052	1.32	0.965775	0.861571	1.1992	0.942761	1.1528	0.939142	2.37363	1.03625	0.886589	1.00541	-2.47766	0.500205	0.00459016	1.00708	-0.200163	0.557377	-0.0588806	-0.128895	-1.24865	-2.0987	0.0873908	0.974219	1.05921	0.916329	1.04234	1.02076	0.907975	1.11982	0.892873	1.04761	0.964168	1.08229	0.997281
BIRB-796	10000	0.979275	0.35	0.613208	0.550797	0.959888	1.52874	0.828947	0.793028	0.768293	0.590844	0.596674	0.842776	0.556393	0.0532319	0.440252	0.577167	0.843476	1.17306	0.506787	0.958333	0.73004	0.856073	0.567219	0.673502	0.701149	0.391447	0.518519	0.539405	0.50939	0.879861	0.647706	1.00105	0.661891	0.850877	0.33214	0.82963	-0.0531034	0.153138	0.812772	0.282765	0.644914	0.39608	0.160335	0.437674	0.256198	0.569048	0.689159	0.318725
BIRB-796	1000	1.01554	0.404444	0.707547	0.557769	1.05131	1.04598	0.810526	0.899782	0.616531	0.711016	0.829522	0.892351	0.706125	0.346008	0.440252	0.754757	0.898577	0.920044	0.538462	1.44444	0.688124	0.89975	0.837937	0.949527	0.708812	0.552632	0.58642	0.670169	0.492958	0.573611	0.671597	0.758741	0.200573	0.605263	0.307073	0.561728	0.0997701	0.227691	1.04644	0.735189	0.59453	0.321006	0.38324	0.621665	0.42562	0.595557	0.766593	0.314741
BIRB-796	100	0.912781	0.486111	0.735849	0.508964	0.561567	0.724138	0.884211	0.930283	0.711382	0.761087	0.669439	0.892351	0.692513	0.26616	0.528302	0.784355	0.926128	0.751369	0.60181	1.31944	0.569361	0.888103	0.915285	0.778391	0.793103	0.575658	0.703704	0.666083	0.443662	0.7	0.719378	0.695105	0.320917	0.692982	0.288272	0.760494	0.247816	0.284111	0.965167	0.77289	0.614683	0.282175	0.238547	0.54082	0.493802	0.576117	0.727876	0.410359
BIRB-796	10	1.0095	0.7	0.754717	0.536853	0.835821	0.885057	0.921053	0.945534	0.711382	0.881259	0.858628	0.941926	0.803111	1.03802	0.660377	0.850951	0.94944	0.881709	0.570136	1.45833	0.709082	0.934692	1.22468	0.966088	0.770115	0.713816	0.697531	0.772329	0.0985915	0.573611	0.73796	0.665734	0.702006	0.719298	0.401074	0.87284	0.622759	0.630685	1.1582	1.03052	0.796065	0.318417	0.363687	0.630028	0.677686	0.731633	0.94469	0.454183
BMS-387032	10000	0.539373	0.0564841	0.229219	0.141892	0.29697	2.0082	0.185972	0.596721	0.20641	0.294118	0.683297	0.435459	0.0409357	0.829384	0.32	0.0224599	0.0337045	0.0697211	0.636364	0.178268	0.280775	0.269231	0.0740181	0.0463576	0.0715144	0.14433	0.641068	-0.201967	0	-0.234477	0.0960187	0.0996441	0.634561	-0.245946	-0.273743	0.480649	-0.0942277	0.0251196	0.122807	0.439661	0.103806	0.0490798	0.0498705	0.123922	0.216416	0.0506246	0.28803	0.0989668
BMS-387032	1000	1.20914	0.0766571	0.211587	0.0810811	0.217424	1.43443	0.111583	1.05574	0.439744	0.352941	0.941432	0.762053	0.0614035	1.09479	0.72	0.0973262	0.122179	0.23008	0.47138	0.415959	0.0193638	0.142857	-0.190332	0.057947	0.0168269	0.24055	0.669815	-0.160656	0.610849	-0.0629085	0.161593	0.131349	0.684136	-0.255405	-0.0651769	0.454432	-0.0638832	0.0313995	0.179487	0.666902	0.0276817	0.0797546	0.145078	0.152519	0.0957592	0.0552268	0.305486	0.137031
BMS-387032	100	1.41067	0.375216	0.652393	1.60811	0.477273	1.03279	1.02657	0.940984	1.16667	0.588235	0.880694	1.45879	0.213982	0.862559	0.56	0.284492	0.893169	0.997012	0.73064	0.451613	0.235592	1.13736	0.729607	0.706954	1.08954	0.67354	0.756057	0.615082	0.908019	0.531863	0.611241	0.846975	0.733711	0.87027	0.886406	0.7603	0.487109	0.399821	0.472335	0.992943	0.871972	0.303681	0.462435	0.56877	0.438577	0.250822	0.689526	0.251223
BMS-387032	10	1.36325	0.940058	1.13728	1.59459	1.0553	1.03279	1.05632	1.03279	1.21154	0.97479	1.29067	1.24106	0.963849	2.0237	1.52	1.0107	1.06801	1.35956	0.824916	1.17657	0.82296	3.15934	1.0574	0.892384	1.10216	0.841924	0.95154	1.10164	1.37028	0.909314	0.679157	0.896797	1.23938	1.12568	1.01676	1.39825	0.790554	1.05712	1.16194	1.11644	0.986159	1	1.42358	1.0168	1.05718	1.0194	1.27431	1.16476
CAL101	10000	0.265976	0.653333	1.11321	0.355578	0.574627	-0.482759	0.322368	0.411765	0.663957	0.781116	0.698545	0.21813	0.0935829	-0.532319	0.176101	0.665962	0.161066	0.0843373	0.190045	0.125	0.268962	0.608569	-1.81768	0.557571	0.126437	0.0460526	0.839506	5.43491	0.607981	0.388889	1.04854	0.841958	0	0.719298	0.206804	0.630864	0.46023	0.604491	0.30479	0.779174	0.644914	0.911243	0.230726	0.362405	0.768595	0.26155	0.0464602	2.23904
CAL101	1000	0.683074	0.871111	1.07547	0.864542	1.16884	-0.0804598	0.939474	0.640523	1.23306	0.711016	0.713098	0.208215	0.501945	0.505703	0.968553	0.569767	0.661217	0.636364	0.855204	0.916667	0.716068	0.751248	-1.89503	0.541009	0.739464	0.782895	0.802469	1.15236	0.361502	0.734028	1.32727	1.28252	0.180516	0.929825	0.319606	0.475309	0.949425	0.94099	0.629898	0.848294	1.41411	0.365015	0.371508	0.71366	0.927686	0.827064	0.890487	3.25896
CAL101	100	2.21848	1.10833	0.90566	1.15737	0.848881	0.482759	1.06842	0.808279	0.550136	0.801144	0.567568	0.624646	1.03281	0.558935	1.49686	0.569767	0.858311	0.90471	0.60181	0.902778	0.778942	0.841514	-0.696133	0.596215	0.873563	0.552632	0.771605	0.90718	0.542254	0.597917	1.12818	0.736713	0.421203	0.807018	0.33214	0.380247	1.03149	0.866436	0.660377	0.89228	1.10509	0.626479	0.613966	0.766627	0.873967	1.12749	1.1615	1.13546
CAL101	10	2.32729	1.02667	0.858491	1.13645	0.809701	1.04598	0.911842	0.960784	0.701897	0.871245	0.844075	0.892351	1.04983	0.558935	1.0566	0.791755	1.02361	1.24973	0.9819	0.902778	0.806886	0.992928	0.953959	0.778391	1.01149	0.875	0.919753	0.927612	0.492958	0.763194	1.0565	0.770979	0.641834	0.973684	0.520143	0.466667	0.963908	0.906736	0.812772	1.0368	1.0144	0.486686	0.715642	0.864198	0.940083	0.949003	1.13053	1.17928
CHIR-258	10000	0.164706	0.949807	0.988943	0.054505	-0.00731452	0.284264	0.171683	0.723658	0.503458	0.323983	0.23569	0.101777	0.196125	0.6	0.671233	0.176056	0.445662	0.254149	0.424242	0.275758	0.0237403	0.225391	0.368421	0.284024	0.854992	-0.397727	0.427861	0.0303176	0.526096	0.167697	0.225131	0.228675	0.532995	0.355122	0.25966	0.812346	0.293327	0.225967	0.225115	0.345964	0.449954	0.244796	0.132168	0.201547	0.280182	0.36775	0.480473	0.0571895
CHIR-258	1000	0.625882	0.84556	0.859951	0.599555	0.497388	0.461929	0.772575	0.333996	0.639004	0.471248	0.377104	0.497577	0.848651	0.533333	1.02283	0.443662	0.800118	0.900415	1.09596	0.530303	0.4375	0.199632	0.725329	0.573964	1.33129	0.265152	0.472637	0.178537	0.496868	0.492272	0.709424	0.170236	0.296108	0.177561	0.119011	0.518519	0.754042	0.762327	0.975498	0.449753	0.861341	0.542048	0.269231	0.806188	0.840547	0.686608	0.944379	0.529956
CHIR-258	100	0.653333	0.888031	0.799754	0.76307	1.14107	0.461929	0.811594	0.584493	0.716459	0.873773	0.683502	0.689822	0.901807	0.8	0.319635	0.549296	0.94729	0.914938	0.989899	0.827273	0.708818	0.444342	0.944079	0.573964	1.10485	0.689394	0.800995	0.646776	0.496868	0.714065	0.861257	0.543739	0.615905	0.682927	0.670788	0.691358	0.841722	0.856687	0.911179	0.478583	0.883838	0.719817	0.846853	0.809196	0.851936	0.724871	0.994083	0.949346
CHIR-258	10	0.730196	0.953668	0.911548	0.942158	0.84117	0.426396	0.842809	0.793241	0.929461	0.765778	0.919192	0.757674	1.00079	1.16667	0.894977	0.760563	0.957655	1.03838	1.20202	0.901515	0.722384	0.811408	1.02467	0.538462	1.16341	0.742424	0.865672	0.663619	0.803758	0.811437	0.963351	0.612341	1.0423	0.74439	1.22257	0.846914	0.820997	0.913799	0.954058	0.593904	0.999541	0.769359	0.915385	0.809196	0.826879	0.733374	0.936095	1.09041
CHIR-265	10000	0.776461	0.395389	0.828715	1.30405	0.859091	0.459016	0.996812	1.31967	1.00513	0.386555	0.561822	0.402799	0.111643	0.92891	0.68	0.0898396	0.351791	0.369522	1.2963	0.190153	0.897188	0.478022	0.465257	0.214404	0.576322	0.28866	0.646817	0.110164	0.544811	0.183007	0.59719	0.226464	0.892351	0.160811	0.0651769	0.550562	0.253936	0.286782	0.236167	0.1729	0.387543	0.134969	0.140544	0.0762596	0.162791	0.218606	0.759352	0.239804
CHIR-265	1000	0.539373	0.520461	0.943325	0.655405	0.588636	0.459016	0.617428	1.10164	0.610256	0.630252	0.4859	0.381026	0.664274	1.26066	0.96	0.202139	0.589828	0.690239	1.06061	0.344652	0.864915	0.401099	0.666163	0.260762	0.66887	0.505155	0.72731	0.29377	0.198113	0.754902	0.555035	0.285345	0.723796	0.0851351	0.221601	0.515605	0.515857	0.713816	0.396761	0.321101	0.712803	0.457055	0.693653	0.432138	0.549658	0.736358	0.706983	0.494834
CHIR-265	100	0.889077	0.851297	1.12846	0.918919	0.970455	0.631148	0.907545	1.10164	1.27436	0.89916	0.637744	0.794712	1.11457	1.26066	1.16	0.456684	0.817334	1.04582	0.872054	0.926995	0.997234	0.813187	0.91994	0.637417	0.959135	0.745704	0.911294	0.913443	0.610849	0.794935	0.859485	0.615982	0.991501	0.368919	0.964618	0.655431	0.755419	1.08224	0.821862	0.859562	0.982699	1.08282	0.915803	1.06446	0.955677	1.0286	0.724439	1.01251
CHIR-265	10	1.52921	1.0853	1.33123	1.32432	1.05	0.860656	1.05632	0.906557	0.987179	0.840336	1.21475	1.29549	1.2411	1.72512	1.92	1.18289	1.08065	1.33865	1.27273	1.59253	1.18442	2.24725	1.03625	0.822848	1.07692	0.938144	0.940041	1.12918	0.858491	0.977941	0.824356	0.944355	1.30878	1.15405	1.08194	1.39825	0.958248	1.07177	0.869096	1.02258	1.11419	1.01534	1.12435	1.01362	1.03611	1.30473	1.24813	3.49048
CI-1033	10000	0.533446	0.00403458	0.282116	1.01351	0.381818	0.172131	0.163656	0.332787	0.0358974	0.294118	0.227766	0.239502	0.0204678	-0.0663507	-0.6	0.239572	0.0800481	-0.0488048	-0.023569	0.273345	0.0484094	0.285714	0.274924	0.289735	0.0546875	-0.264605	0.643943	0.0137705	0.990566	0.00571895	0.180328	0.518602	0.674221	-0.151351	0.156425	0.769039	-0.0718686	0.0334928	0.217274	0.01482	-0.0138408	0.0368098	0.0589378	0.123922	0.101505	0.0299145	0.0174564	0
CI-1033	1000	1.06097	0.726225	0.881612	0.945946	0.843182	0.229508	0.669501	0.481967	0.574359	0.823529	0.652928	0.838258	0.93966	0.895735	0.2	0.591444	1.08065	0.948207	0.636364	0.748727	0.771323	0.67033	0.91994	1.15315	1.14423	0.890034	0.888296	0.817049	0.379717	0.691993	0.730679	0.527661	0.664306	0.643243	1.22533	0.707865	0.948665	1.02362	1.0108	0.360621	1.29066	0.886503	4.31153	0.899228	1.01696	1.32084	0.829177	0.643284
CI-1033	100	0.912786	0.927954	0.925693	0.959459	0.774242	0.459016	0.81084	1.09016	0.574359	0.92437	0.759219	1.06687	1.07735	1.32701	1.16	0.875936	0.998495	1.14343	0.777778	0.65365	0.974643	0.846154	0.97281	1.11838	1.02224	0.865979	0.977413	0.982295	0.676887	0.829248	0.882904	0.53672	0.773371	0.936486	1.62942	0.777778	0.924709	0.994318	1.11471	0.721242	1.6782	0.723926	4.36593	1.22969	1.09932	1.28863	0.916459	1.67863
CI-1033	10	0.930567	1.00058	0.846348	0.993243	0.959848	0.516393	0.885228	1.10164	0.879487	0.966387	1.03254	0.762053	1.10712	2.95261	1.32	1.25027	1.10803	1.22012	1.10774	0.78438	0.981097	1.04396	1.03625	0.863411	1.10637	0.865979	0.948665	1.09705	0.660377	0.697712	0.742389	0.464251	0.813031	1.0027	1.0689	0.742821	0.816108	0.992225	1.28475	0.691602	1.42215	0.953988	2.26684	1.29959	1.13379	1.4451	0.977556	1.13051
CP-690550	10000	0.219608	1.32046	0.928747	0.98109	1.16301	1.27919	0.749164	0.709742	1.0166	0.58906	0.707071	0.915994	0.447237	1.6	0.73516	0.971831	0.974237	0.871369	1.34343	0.901515	0.725775	0.965961	0.667763	0.946746	0.917457	0.583333	0.791045	0.670356	0.979123	1.04405	0.507853	0.871506	0.98308	1.0722	0.984544	0.916049	0.25985	0.404753	0.525268	0.789951	0.75528	0.769359	0.494406	0.709927	0.46697	1.01609	1.00237	0.472767
CP-690550	1000	0.499608	0.980695	0.808354	0.87208	0.738767	0.817259	0.842809	0.709742	0.842324	0.58906	0.683502	0.870759	0.757004	0.7	1.50228	0.816901	0.930708	0.965768	1.20202	0.784848	0.752907	0.779209	0.65625	0.710059	1.07362	0.583333	0.880597	0.828681	0.803758	0.746522	0.591623	0.863884	0.592217	0.949268	0.876352	0.760494	0.473468	0.643136	0.750383	1.06096	0.816345	0.982098	0.71958	1.17619	0.765376	0.916186	0.80355	0.777778
CP-690550	100	0.916863	0.980695	0.765356	0.755284	0.709509	0.461929	0.952062	1.12724	0.784232	0.913043	0.659933	1.00646	0.91647	1	1.27854	1.07042	0.984602	1.13278	1.16667	1.2197	0.800388	0.817847	0.817434	0.698225	1.12047	0.609848	0.925373	0.835419	0.701461	0.730294	0.730366	0.797822	0.769882	1.01756	0.876352	0.74321	0.720565	0.871586	0.846861	0.991763	0.906336	0.947127	0.905594	0.842286	0.85877	0.85454	1.02722	1.0561
CP-690550	10	1.01569	0.976834	1.09214	0.76307	0.848485	0.426396	0.983278	0.932406	1.14246	1.1683	0.707071	1.21002	1.02278	1.73333	0.543379	0.852113	1.04886	1.0166	1.16667	1.09242	0.75969	0.875805	0.909539	0.674556	1.16341	0.609848	0.900498	0.852262	0.672234	0.708655	0.890052	0.655535	0.947547	0.990244	0.865533	0.838272	0.92143	1.01809	0.87902	0.824547	0.94169	1.04038	0.851748	0.872368	0.94533	0.888551	1.0355	1.20479
CYC-202	10000	0.834197	0.703889	0.735849	0.536853	0.724813	2.57471	0.884211	0.56427	0.787263	0.801144	0.669439	0.961756	0.423675	0.479087	0.484277	0.547569	0.940963	1.12705	0.60181	0.805556	0.73004	0.96381	0.953959	0.811514	0.781609	0.552632	0.358025	0.886748	0.394366	0.627083	0.846796	0.761189	0.140401	0.719298	0.219338	0.855556	0.102989	0.245826	0.203193	0.477558	0.601248	0.331361	0.516201	0.395858	0.402893	0.597324	0.627212	0.581673
CYC-202	1000	1.02159	0.948889	0.943396	0.550797	0.803172	0.885057	0.921053	1.00654	0.910569	0.93133	1.04782	1.04108	0.93753	0.425856	0.748428	0.850951	1.00242	1.15005	0.823529	1.26389	0.939621	0.99584	1.39227	0.883281	0.850575	0.782895	0.716049	0.90718	-0.0164319	0.753472	0.902541	0.793007	0.581662	0.763158	0.513876	0.760494	0.849655	0.930915	0.87373	1.06194	1.01775	0.875	1.02067	0.86141	0.942149	0.865943	1.09956	1.05578
CYC-202	100	1.08204	1.00333	0.90566	0.718127	1.02519	0.965517	1.25263	1.14379	1.10976	1.16166	1.30977	1.07082	0.905202	0.958175	1.18868	0.932347	1.03845	1.21906	0.950226	1.55556	1.0479	1.08902	1.45672	1.0489	0.934866	0.898026	0.962963	0.997081	0.755869	0.345139	1.05119	0.849301	1.24355	0.903509	0.676813	0.907407	0.926897	0.959125	0.955007	1.14363	1.12188	0.93713	0.934637	0.911589	1.03306	0.892451	1.30863	1.01594
CYC-202	10	1.02159	1.03444	1.09434	0.613546	1.12313	1.2069	1.06842	1.00654	1.07182	1.14163	0.931393	0.941926	0.803111	0.425856	1.0566	0.924947	0.993945	1.04272	1.26697	1.27778	1.03044	0.905574	1.1989	0.811514	0.739464	0.851974	0.783951	0.821366	0.542254	1.02569	0.905195	1.08916	2.26648	3.64035	0.564011	0.769136	0.79977	0.959125	0.955007	1.04937	1.12188	1.01738	0.969832	0.864198	0.971074	0.917193	1.43252	1
CYT387	10000	0.0713725	0.343629	0.679361	0.132369	0.182863	1.31472	0.382386	0.250497	0.474412	0.215989	0.0942761	0.0678514	0.0696517	0.866667	0.575342	0.119718	0.424933	0.907676	0.742424	0.413636	0.20688	0.109476	0.333882	0.704142	0.249861	-0.0530303	0.527363	0.370549	0.350731	0.51391	0.403141	1.14592	1.03046	0.355122	0.432767	0.82963	0.00159417	0.0695282	0.117917	0.311367	0.102847	0.072856	0.132168	0.102278	0.0933941	0.0616459	0.339645	0.163943
CYT387	1000	0.236078	1.04247	0.730958	0.65406	0.577847	0.675127	0.850613	0.347913	0.764869	0.461431	0.612795	0.667205	0.689186	0.766667	1.08676	0.619718	0.901688	1.16183	0.919192	0.562121	0.85126	0.476541	0.495066	0.526627	1.06972	0.450758	0.701493	0.653513	0.803758	0.811437	0.586387	0.868966	0.698816	0.887805	0.627512	0.561728	0.151446	0.310394	0.653905	0.622735	0.899908	0.716903	0.592308	0.523421	0.52164	0.833283	0.894675	0.62146
CYT387	100	0.636863	1.03089	0.782555	0.708565	0.643678	0.426396	0.944259	0.654076	0.832642	0.638149	0.707071	0.938611	0.931134	0.766667	1.37443	0.859155	0.982529	1.07469	1.13131	1.13485	0.773256	0.663293	0.725329	0.710059	0.98773	0.265152	0.830846	0.754572	0.686848	0.746522	0.782723	0.853721	0.71066	0.983415	0.952087	0.760494	0.57709	0.831855	0.803982	0.784185	0.944904	0.8801	0.70979	0.929523	0.90205	0.801397	1.0355	1.19336
CYT387	10	0.735686	0.957529	0.920147	0.65406	0.77534	0.497462	1.0301	1.12724	1.13278	0.795231	0.919192	0.938611	0.99712	1.2	0.703196	0.915493	0.988747	1.08921	0.707071	1.10303	0.73595	0.985281	0.909539	0.532544	0.972114	0.530303	0.875622	0.845525	0.730689	0.77898	0.863874	0.777495	0.781726	1.05854	1.12519	0.87284	0.870417	1.01313	0.836141	0.905272	0.973829	0.906328	0.807692	0.90245	0.943052	0.873671	0.985799	1.05991
Dasatinib	1000	0.861961	0.517375	0.911548	1.47164	0.680251	0.675127	0.842809	1.66998	0.910097	0.461431	1.2963	0.972536	0.516889	0.966667	0.767123	0.352113	1.0074	1.54668	0.707071	0.965152	0.491764	0.49586	0.230263	0.47929	0.933073	0.397727	0.60199	0.36718	0.789144	0.438176	0.696335	0.294737	0.402707	0.997073	-0.0865533	0.535802	0.299704	0.387371	0.332312	0.645799	1.12167	0.483764	0.146853	0.373012	0.428246	0.673854	0.902959	0.434641
Dasatinib	100	1.03216	0.803089	1.19533	1.44828	0.687565	0.675127	0.881828	1.33598	1.26833	0.755961	1.39057	1.07431	0.439906	1.46667	1.6621	0.408451	1.0074	1.00207	1.02525	1.00758	0.725775	0.75989	0.506579	0.680473	1.03848	0.662879	0.621891	0.357074	0.847599	0.52473	0.803665	0.498004	0.615905	1.22244	0.205564	0.630864	0.487816	0.514012	0.557427	0.957166	0.964187	0.320566	0.146853	0.376021	0.578588	0.720619	0.969231	0.400327
Dasatinib	10	1.3451	1.10425	1.20393	1.63515	0.702194	0.604061	0.983278	1.0994	1.14246	0.952314	1.22559	1.3231	0.672689	1.36667	1.05479	0.478873	0.992893	0.958506	1.66162	1.2197	0.858043	0.824287	0.495066	0.585799	1.10485	0.238636	0.656716	0.431184	0.745303	0.51391	0.903141	0.721597	0.414552	1.06537	0.335394	0.65679	0.742883	0.754878	0.782542	0.813015	0.973829	0.469192	0.279021	0.694886	0.642369	0.752505	1.15148	0.47658
Dasatinib	1	1.14196	0.976834	1.33292	1.68966	0.907001	0.852792	1.01449	1.28032	1.2296	1.08976	1.46128	1.30048	0.859649	1.7	1.47032	0.915493	1.04264	1.03112	1.69697	0.975758	1.00048	0.895124	0.621711	0.857988	1.10095	0.875	0.81592	0.882579	0.949896	0.800618	1.00524	0.952813	1.13706	1.2839	0.919629	1.01111	0.827374	1.02057	0.975498	0.813015	0.932048	0.952956	0.758741	1.02879	0.906606	1.13726	1.15148	0.671024
EGFR	500	0.859441	0.927954	0.952141	1.27027	1.38409	0.401639	0.989373	1.03279	0.771795	0.714286	0.819957	0.914463	1.07363	0.563981	0.28	0.831016	0.954258	0.871514	0.636364	0.570458	1.03919	1.13187	0.771903	1.01407	1.0012	0.793814	1.00041	1.1659	1.4033	0.93219	0.822014	0.890003	0.971671	0.993243	1.05587	0.891386	1.13393	0.921053	0.982456	0.612562	0.920415	1.17485	2.05376	1.33137	1.03228	1.33235	0.890274	1.09625
EGFR	50	1.17951	0.956196	0.872796	1.16892	1.19848	0.516393	0.803401	1.20492	0.682051	0.764706	0.774403	1.0451	1.00478	0.597156	0.72	0.950802	1.00481	1.13645	0.73064	0.843803	0.961734	1.19231	0.91994	0.759106	0.996995	0.4811	0.971663	1.18426	0.429245	0.823529	0.866511	0.690715	0.813031	0.889189	0.860335	0.838951	1.03331	0.946172	1.02024	0.864502	1.02076	1.12883	1.06088	1.1153	1.08974	1.08153	1.00374	0.879282
EGFR	5	1.25064	0.883573	0.811083	1.05405	0.922727	0.57377	0.766206	0.963934	0.717949	0.89916	0.744035	1.01244	0.956406	0.630332	0.44	0.905882	0.992176	0.899402	0.565657	0.938879	0.932688	1.14835	0.993958	0.741722	1.02644	0.505155	0.968789	1.20262	0.445755	0.81781	0.840749	0.588806	0.684136	0.964865	1.05587	0.786517	0.878394	0.877093	0.906883	0.849682	0.972318	0.93865	0.992876	0.959601	0.959508	0.943458	0.933915	0.871669
EGFR	0.5	1.00169	0.940058	0.855164	1.03378	0.869697	0.688525	1.02657	1.17049	0.942308	1.06723	0.819957	1.06687	1.01223	1.12796	1.12	1.00321	1.01956	1.05279	0.777778	0.713073	0.887506	1.1044	1.20544	0.759106	1.13161	0.865979	0.965914	1.12918	0.528302	0.846405	0.791569	0.643158	0.932011	0.993243	1.75978	0.777778	0.843258	0.923146	1.06748	1.08186	0.958478	0.861963	1.15155	0.870631	0.967168	0.950362	0.995012	0.947798
EKB-569	10000	0.237087	0.855331	0.299748	2.33108	0.715909	0.229508	0.557917	0.493443	0.332051	0.235294	0.683297	0.228616	0.119086	0.265403	-0.28	0.306952	0.545591	1.03884	0.589226	0.594228	0.213001	0.346154	0.380665	0.706954	0.504808	-0.0721649	0.632444	-0.0137705	1.65094	0.114379	0.264637	0.62504	0.694051	0.945946	0.182495	0.716604	-0.0670773	0.0481459	0.236167	0.217361	0.0449827	0.0490798	0.108808	0.098502	0.116826	0.0644313	0.0349127	0.0304513
EKB-569	1000	0.622354	0.782709	0.722922	0.77027	0.82197	0.229508	0.490967	0.481967	0.314103	0.546218	0.409978	0.359253	0.586124	0.199052	0.16	0.471658	0.712007	0.522908	0.754209	0.796265	0.371139	0.43956	0.539275	0.417219	0.841346	0.4811	0.764682	0.339672	0.742925	0.468954	0.540984	0.323843	0.753541	0.104054	0.299814	0.594257	1.00776	0.512859	0.859649	0.316161	0.788927	0.257669	0.285622	0.292329	0.501778	1.19428	0.549875	0.213159
EKB-569	100	1.18544	0.867435	0.828715	0.932432	0.620455	0.860656	0.81084	1.23934	0.565385	0.663866	0.592191	0.881804	0.975013	0.796209	0.04	0.845989	1.00692	0.871514	0.707071	0.701188	0.868142	0.851648	0.993958	0.724338	0.984375	0.62543	0.879671	0.927213	0.726415	0.754902	0.693208	0.53672	0.634561	0.860811	1.05587	0.699126	0.835273	0.820574	0.991903	0.790402	1.19031	0.846626	1.2785	1.07399	0.99015	1.37607	0.811721	0.616639
EKB-569	10	1.04318	0.944092	0.872796	1.10811	0.816667	0.745902	0.848034	1.42295	0.852564	0.823529	1.07809	0.990669	1.04758	0.995261	1.12	0.958289	1.07433	1.12251	0.73064	0.689304	0.868142	1.09341	1.17372	0.77649	1.11058	1.05842	0.986037	1.11082	0.610849	0.823529	0.833724	0.615982	0.773371	1.04054	0.951583	0.830212	0.812914	0.925239	1.02969	0.938603	0.975779	0.966258	1.07902	0.991375	1.03037	1.06082	0.968828	0.75367
Erlotinib	10000	0.675699	0.496254	0.608312	0.72973	1.16667	0.97541	0.691817	0.321311	0.457692	0.521008	0.409978	0.479005	0.656831	0.364929	-0.24	0.501604	0.66777	0.522908	0.282828	0.546689	0.335639	0.505495	0.666163	0.585265	1.00962	0.4811	0.67269	0.610492	1.78302	0.640523	0.482436	0.5956	0.783286	0.208108	0.312849	0.838951	0.351358	0.447967	0.699055	0.14326	0.491349	0.447853	0.204016	0.629142	0.662654	0.713346	0.488778	0.194127
Erlotinib	1000	1.08467	0.887608	0.775819	1.00676	1.07121	0.803279	0.862912	0.84918	0.655128	0.831933	1.00217	0.816485	1.00478	0.43128	0.68	0.958289	1.03009	1.26195	0.707071	0.926995	0.819733	1.04396	0.993958	0.724338	1.13582	0.938144	0.845175	1.11082	0.214623	0.686275	0.819672	0.620511	0.803116	0.737838	0.951583	0.751561	0.774584	0.88756	0.982456	0.523641	0.885813	0.923313	0.988342	1.15025	1.06676	0.998685	0.890274	0.654704
Erlotinib	100	1.09653	0.923919	0.811083	0.939189	0.811364	0.631148	0.729012	0.757377	0.628205	1.08403	0.713666	0.881804	0.937799	0.862559	1.28	0.913369	1.01956	1.06673	0.612795	0.701188	0.871369	0.901099	0.909366	0.701159	1.07272	0.865979	0.928542	1.04656	0.858491	0.777778	0.873536	0.584277	0.654391	0.756757	1.12104	0.777778	0.817705	0.914773	1.02969	0.810162	0.885813	0.935583	1.04728	0.889696	1.01122	0.90664	0.872818	0.940185
Erlotinib	10	0.942422	1.01671	0.828715	1.00676	0.832576	0.57377	0.751328	1.5377	0.691026	0.823529	0.895879	1.03421	1.04014	0.962085	1.2	1.0107	1.06801	1.23406	0.659933	0.665535	0.806823	1.03297	0.867069	0.724338	1.11058	0.890034	0.934292	1.11541	0.676887	0.834967	0.838407	0.575218	0.862606	0.908108	0.873371	0.838951	0.865617	0.965012	0.944669	1.02258	0.972318	0.990798	1.02008	0.965956	1.05527	0.925049	1.00374	0.822186
Flavopiridol	10000	0.164706	0.0810811	0.0687961	0.272525	0.204807	1.42132	0.187291	1.11332	0.232365	0.215989	0.023569	0.113086	0.0843153	1.23333	0.894977	0.34507	0.0456026	0.0726141	0.388889	0.827273	-0.00339147	0.24471	0.161184	0.177515	0.148355	-0.132576	0.373134	-0.0168431	0.175365	-0.0324575	0.0942408	0.106715	0.118443	0.00682927	-0.270479	0.440741	0.00159417	0.081944	0.0750383	0.311367	0.0449954	0.049542	0.0538462	0.11431	0.0933941	0.0510173	0.12426	0.122004
Flavopiridol	1000	0.472157	0.216216	0.0773956	0.132369	0.00731452	1.13706	0.124861	1.0994	0.300138	0.176718	0.377104	0.23748	0.0568212	0.7	0.639269	0.211268	0.053894	0.174274	0.565657	0.657576	0.0508721	0.302668	0.21875	0.260355	0.0858896	0.0530303	0.39801	-0.0134745	0.102296	0	0.117801	0.129583	0.248731	-0.0136585	-0.140649	0.492593	0.00159417	0.0546293	0.085758	0.455519	0.0610652	0.0670275	0.112587	0.120327	0.143508	0.0488916	0.107692	0.14488
Flavopiridol	100	0.461176	0.440154	0.584767	0.560623	0.321839	0.781726	0.733556	0.723658	0.755187	0.598878	0.47138	1.0517	0.091647	0.7	0.607306	0.443662	0.586615	1.06743	1.13131	1.08182	0.844477	0.869365	0.391447	0.39645	0.722253	0.185606	0.353234	0.289702	0.482255	0.275889	0.484293	0.724138	0.307953	0.519024	0.0432767	0.553086	0.00159417	0.146506	0.171516	0.455519	0.443526	0.180683	0.430769	0.192523	0.341686	0.242332	0.231953	0.366013
Flavopiridol	10	1.14745	1.01158	1.45332	1.27697	1.13375	0.959391	1.0301	1.3499	1.29737	0.991585	1.20202	1.4475	0.870647	1.06667	1.56621	1.23944	1.03642	1.29253	1.27273	1.08182	1.24128	1.3781	1.01316	0.591716	1.14389	0.768939	0.825871	0.788258	0.979123	1.06028	1.00262	1.11034	1.00677	1.18829	1.19011	0.846914	0.671146	0.841788	0.825421	0.968699	1.0124	1.01415	1.60559	0.866352	1.10706	0.85454	1.16805	1.19336
Gefitinib	10000	0.296359	0.24611	0.696474	1.0473	1.06591	0.688525	0.773645	0.585246	0.511538	0.579832	0.637744	0.206843	0.247475	0	-0.72	0.134759	0.802588	0.543825	0.424242	1.02207	0.545413	0.472527	0.454683	0.585265	1.15264	0.14433	0.669815	0.358033	1.04009	0.423203	0.522248	0.516338	0.763456	0.359459	0.560521	0.84769	0.351358	0.309809	0.727395	0.256881	0.768166	0.303681	0.122409	0.327281	0.660739	0.961867	0.593516	0.0837412
Gefitinib	1000	0.806097	0.927954	0.855164	1.05405	0.864394	0.459016	0.788523	0.860656	0.628205	0.865546	0.804772	0.914463	0.859649	0.829384	0.72	0.786096	0.98375	1.10159	0.707071	1.41426	0.897188	0.989011	0.888218	0.683775	1.14423	0.649485	0.830801	1.04656	0.330189	0.749183	0.819672	0.557101	0.723796	0.974324	0.782123	0.751561	0.830481	0.854067	0.954116	0.523641	0.82699	0.671779	0.766192	0.854744	1.08974	0.925049	0.872818	0.589995
Gefitinib	100	0.812024	0.936023	0.828715	0.885135	0.75303	0.803279	0.795962	0.82623	0.628205	1	0.759219	1.33904	0.91547	0.729858	0.92	0.973262	1.02167	0.983068	0.636364	0.701188	1.00692	0.950549	0.930514	0.747517	1.02224	0.553265	0.902669	1.00066	0.891509	0.76634	0.82904	0.554837	0.763456	0.851351	1.2514	0.725343	0.899156	0.908493	1.00135	0.652082	0.899654	0.858896	0.979275	0.857921	1.02462	0.879027	0.890274	0.784122
Gefitinib	10	0.906859	0.980403	0.872796	0.945946	0.715909	0.631148	0.818278	1.62951	0.852564	1.13445	0.911063	1.06687	1.00851	1.39336	0.96	0.935829	1.04905	1.18526	0.895623	0.831919	0.719686	1.01648	0.941088	0.782285	0.946514	0.865979	0.911294	1.00525	0.610849	0.783497	0.903981	0.591071	0.862606	0.964865	0.873371	0.777778	0.822496	0.939892	0.982456	0.686662	0.889273	0.48773	1.00648	0.854744	1.00547	0.945759	0.995012	0.864057
Gö6976	10000	1.03368	0.497778	1.27358	0.864542	0.620336	1.04598	0.423684	0.823529	0.777778	0.79113	0.756757	0.25779	0.53087	0.558935	1.32075	0.214588	0.362398	0.690033	1.42534	0.444444	0.010479	0.681364	1.25046	0.281546	0.0881226	0.414474	0.617284	1.00117	0.0492958	0.505556	1.04854	0.254545	0.601719	0.570175	0.100269	0.78642	0.56	0.834197	0.640058	0.816876	1.24616	0.815459	2.18603	0.83632	0.799587	0.966675	0.402655	2.89243
Gö6976	1000	1.94041	0.540556	0.962264	0.85757	0.600746	0.885057	1.12368	1.08279	0.98645	1.14163	0.989605	0.733711	0.905202	1.35741	1.2327	0.628964	1.02361	0.90471	0.950226	0.805556	0.489022	0.928869	1.81768	0.563091	0.704981	0.759868	0.882716	0.821366	0.180751	0.690278	1.01403	0.562937	0.501433	0.72807	0.495076	0.769136	0.769195	1.02965	0.965167	0.848294	1.07821	0.512574	1.09106	0.73875	0.92562	0.786418	0.89823	1.38247
Gö6976	100	1.62608	0.820556	1.06604	1.1992	0.809701	0.965517	1.16053	1.00654	1.64092	1.0515	0.902287	1.1898	1.00559	1.3308	1.27673	0.924947	1.17196	1.11939	0.855204	1.15278	0.747505	1.04243	1.52118	0.618297	0.950192	0.828947	0.919753	0.768243	0.34507	0.30625	1.11225	0.714685	0.842407	0.859649	0.564011	0.74321	0.84	1.01554	0.843251	1.04937	1.14875	0.758506	0.797765	0.783353	1.0124	0.878314	1.14602	1.1992
Gö6976	10	1.64421	1.03056	1.38679	1.30378	1.12966	1.04598	1.12368	1.12854	1.28049	1.18169	0.989605	1.04108	0.966456	1.09125	2.02516	1.22833	1.08719	1.14239	1.14027	1.41667	1.01297	1.07155	1.75322	0.850158	0.969349	0.851974	0.895062	0.821366	0.788732	0.845833	1.13083	1.0035	5.25501	2.9386	0.639212	0.941975	0.848046	1.01554	0.792453	0.929982	1.06142	0.569527	0.915084	0.925528	1.04959	1.06211	1.33186	1.39841
GW-2580	10000	0.603922	0.864865	0.653563	0.895439	0.512017	0.888325	0.819398	0.848907	0.842324	0.520337	0.636364	0.802908	0.588374	1.1	1.21461	0.739437	1.05715	1.11826	0.707071	1.11364	0.698643	1.08832	0.564145	0.775148	0.386503	0.636364	0.487562	0.370549	0.672234	0.827666	0.704188	0.787659	0.746193	0.826341	0.476043	0.855556	0.763607	0.876552	0.535988	0.582372	0.816345	0.973356	0.293706	0.412119	0.596811	0.663225	0.828402	0.427015
GW-2580	1000	0.790588	1.03475	0.928747	0.661846	0.636364	0.532995	0.928651	0.932406	1.15214	0.618513	0.754209	1.063	0.680021	1.66667	0.73516	0.866197	1.00118	1.06017	0.565657	1.02879	0.834302	0.908004	0.610197	0.727811	0.253765	0.530303	0.60199	0.471607	0.511482	0.746522	0.798429	0.64029	0.521151	0.93561	0.822257	0.760494	0.886358	1.05286	0.85758	0.668863	0.890266	0.950042	0.474825	0.691878	0.731207	0.665351	0.952663	0.545207
GW-2580	100	0.955294	1.10425	1.29853	1.15239	0.789969	0.817259	0.998885	1.16899	1.29737	0.84432	0.895623	1.11955	0.91647	1.96667	1.24658	0.971831	1.05922	1.15456	1.44949	1.08182	1.01744	1.01748	1.08224	0.869822	0.304518	0.848485	0.716418	0.700674	0.920668	0.789799	0.848168	1.03158	0.959391	1.09268	1.13601	0.907407	0.958096	1.11245	0.996937	0.997529	1.09275	0.967527	0.93986	0.941556	0.943052	0.875797	1.06864	0.991285
GW-2580	10	0.905882	1.11969	1.10074	0.731924	0.92163	1.06599	1.00669	0.862823	1.17151	0.922861	0.872054	0.904685	0.910971	0.933333	1.02283	0.978873	1.0302	1.00207	0.919192	0.774242	1.10223	0.695492	0.828947	0.668639	0.144451	0.556818	0.78607	0.781521	0.759916	0.838485	0.989529	0.975681	0.71066	1.04488	0.995363	0.769136	0.892735	1.08514	0.986217	1.09555	1.05096	0.950042	0.979021	1.01375	1.03645	1.00547	1.0355	1.10948
GW-786034	10000	0.776461	0.423631	0.722922	1.31081	0.747727	1.54918	0.959617	0.654098	1.0141	0.621849	0.911063	0.685848	0.554492	0.895735	0.6	0.374332	0.779416	2.15438	0.47138	0.475382	0.458276	0.840659	0.719033	0.48096	1.05589	0.168385	0.718686	0.454426	-0.0330189	0.800654	0.580796	0.808476	0.703966	0.482432	0.117318	0.585518	0.273101	0.621711	0.481781	0.775582	1.33564	1.0092	0.176813	0.45438	0.541997	0.938856	1.16085	0.194127
GW-786034	1000	1.30398	0.899712	0.855164	1.43919	0.975758	0.918033	1.13815	0.97541	1.32821	0.92437	0.986985	1.0451	0.947103	1.06161	2.12	0.509091	0.973217	1.5757	1.01347	0.91511	0.900415	1.13187	0.761329	0.718543	1.17788	0.62543	0.830801	0.862951	0.132075	0.955065	0.763466	0.729214	0.872521	1.23919	1.16015	0.873908	0.68355	0.916866	0.878543	0.899083	1.16609	1.38344	0.471503	0.946891	0.804378	0.929652	1.07357	0.494834
GW-786034	100	1.32176	1.02478	1.03149	1.64189	1.05	0.918033	0.959617	1.05574	1.34615	1.04202	0.9718	1.11042	0.960128	0.597156	1.12	0.696257	0.98375	1.20618	0.683502	0.974533	0.964961	1.35165	1.07855	0.741722	0.967548	0.962199	0.914168	1.05115	0.0660377	0.829248	0.814988	0.856034	0.892351	1.11622	1.0298	0.786517	0.726671	1.01316	0.935223	1.03246	0.99308	1.15951	1.20142	0.988198	0.98632	0.943458	1.21322	1.05438
GW-786034	10	1.3514	1.08127	1.40176	2.08108	0.959848	1.09016	1.07864	1.06721	1.21154	1.22689	1.07809	1.6112	1.02525	1.29384	1.68	0.958289	1.04273	1.17829	1.15488	1.34295	1.16183	2.35714	1.18429	0.840232	1.1274	1.13058	0.991786	1.15213	0.511792	1.09232	0.793911	1.05079	1.55666	1.37162	1.17318	1.44195	0.873603	1.08224	0.935223	1.1609	1.03806	1.02147	1.06088	0.959601	1.06293	0.991782	1.13466	1.13051
H-89	10000	0.889412	0.779923	0.928747	1.14461	0.760711	0	0.842809	0.473161	0.687414	0.530154	0.259259	0.3958	0.634197	2.36667	1.59817	0.795775	0.85194	1.111	0.883838	0.710606	0.525678	0.48942	0.322368	0.473373	0.796431	0.583333	0.482587	0.528874	0.350731	0.459815	0.670157	0.45735	0.876481	0.887805	0.833076	0.78642	0.669551	0.809507	0.214395	0.386326	0.822773	0.437136	0.303497	0.433176	0.571754	0.678105	1.37515	0.343137
H-89	1000	1.09255	1.139	0.911548	0.677419	0.848485	0.390863	0.952062	0.960239	0.948824	0.88359	0.73064	1.063	0.918303	1.23333	1.05479	1.14789	1.13592	1.19087	0.954545	0.859091	0.661337	0.869365	0.955592	0.692308	1.03848	0.530303	0.756219	0.764678	0.482255	0.64374	0.91623	0.523412	0.71066	1.01756	0.930448	0.820988	0.838533	0.995743	0.8683	0.686161	1.00275	0.725645	0.660839	0.818221	0.835991	0.9587	1.23432	1.12092
H-89	100	1.00471	1.139	1.18673	1.14461	0.77534	0.568528	0.991081	1.04374	1.17151	1.08976	0.919192	1.25525	0.97879	0.766667	1.37443	1.04225	1.04679	1.24896	1.30808	0.890909	0.936047	1.24931	1.07072	0.721893	1.17513	0.92803	0.840796	0.825313	0.876827	0.708655	1.01309	0.879129	0.817259	1.1678	1.15765	0.941975	0.986791	1.03051	0.964778	1.12438	1.05418	1.03747	0.895804	0.947572	0.977221	0.939569	1.18462	1.03704
H-89	10	1.09804	1.09653	1.7973	0.98109	0.994775	0.781726	1.15496	1.04374	1.23928	1.03086	1.24916	1.04039	0.945797	1.53333	1.50228	1.28169	0.984602	1.19087	1.37879	0.848485	0.922481	1.10764	1.07072	0.585799	1.09704	0.689394	0.905473	0.730991	0.891441	1.0711	0.997382	1.04428	1.06599	1.26341	1.12519	0.941975	0.840128	0.978361	1.0291	1.19934	1.08953	0.865529	1.0035	0.965621	1.08656	0.999089	1.20947	1.18954
IC87114	10000	0.62867	0.867222	0.981132	1.0249	1.02519	0.16092	0.764474	0.625272	0.957995	0.821173	0.727651	0.684136	0.702722	0.745247	0.132075	0.577167	0.777778	0.720701	1.17195	0.972222	0.771956	0.789101	0.47698	0.977129	0.950192	0.621711	0.679012	1.01343	1.23239	0.826389	1.10694	0.744056	0.361032	1.02632	0.282005	0.795062	0.609885	0.745538	0.609579	0.603232	0.557582	0.442678	0.422346	0.814018	1.16736	0.592022	0.867257	0.561753
IC87114	1000	0.677029	0.906111	0.839623	1.06673	1.03172	1.12644	0.782895	0.793028	0.844173	0.751073	0.756757	0.753541	0.784395	1.09125	0.528302	0.70296	0.864668	0.782037	0.696833	0.861111	0.709082	0.949251	-1.45672	0.844637	0.942529	0.805921	0.67284	1.00117	0.492958	0.797222	0.992795	0.702448	0.30086	1	0.451209	0.665432	0.873793	0.820092	0.690856	0.829443	0.772553	0.667899	0.621788	1.02589	0.966942	0.78465	0.890487	0.76494
IC87114	100	0.888601	0.824444	0.801887	1.31076	0.705224	0.804598	0.810526	0.869281	0.96748	0.751073	0.785863	0.872521	0.859261	0.958175	0.352201	0.762156	0.921889	0.835706	0.665158	0.652778	0.873253	1.11522	0.631676	0.855678	0.980843	0.621711	0.876543	0.997081	0.42723	0.719444	0.987486	0.646154	0.260745	0.877193	0.401074	0.725926	1.03793	0.896661	0.640058	1.03052	0.849808	0.753328	0.754749	0.839108	0.913223	0.841202	0.844027	0.928287
IC87114	10	1.41451	0.933333	0.943396	1.16434	0.914179	0.724138	0.957895	1.15904	0.758808	1.22175	0.91684	1.05099	0.879679	1.06464	1.01258	0.902748	1.1974	0.996714	0.791855	1.06944	0.904691	1.08902	1.17311	0.888801	1.10345	0.782895	0.981481	0.976649	0.542254	0.836111	0.929086	0.797902	0.782235	1.01754	0.589078	0.812346	1.13287	0.918826	0.955007	1.25045	0.953935	0.924186	0.918994	0.914377	1.02273	0.906589	0.960177	1.03187
Imatinib	10000	0.84549	0.849421	1.02334	1.85317	0.782654	1.49239	1.01449	1.1829	1.17151	0.667602	1.367	1.04039	0.689186	0.733333	1.08676	0.450704	0.986675	1.60477	0.60101	1.18788	1.00048	0.734131	0.460526	0.83432	1.22197	0.82197	0.671642	0.606352	1.46138	0.860124	0.774869	0.830853	0.781726	1.33171	0.421947	0.950617	0.820997	0.81199	0.535988	0.668863	1.02204	1.19192	0.401399	0.604641	0.708428	0.818403	1.15148	0.301198
Imatinib	1000	0.993725	0.803089	0.997543	1.54171	0.928945	1.56345	1.07692	1.15507	1.34578	0.913043	1.74411	1.10824	0.956795	1.13333	1.88584	0.570423	1.01777	1.11826	0.954545	1.41061	0.861434	0.972401	0.978618	0.905325	1.15561	1.16667	0.890547	1.22955	1.28601	1.09815	0.958115	0.874047	0.935702	1.12	0.919629	1.08889	1.11432	0.963462	0.986217	1.10708	0.989899	0.999584	0.886014	1.08595	0.990888	0.97358	1.11006	1.01035
Imatinib	100	0.993725	0.841699	1.15233	1.6663	1.09718	1.63452	0.96767	1.15507	1.52006	0.913043	1.43771	1.01777	0.956795	1.03333	1.15068	0.683099	1.01569	0.987552	1.62626	0.657576	0.861434	1.07544	0.955592	0.887574	1.06581	0.901515	0.985075	0.916266	1.13987	1.21716	0.979058	1.07985	0.722504	1.18829	0.768161	0.924691	0.994762	1.09507	0.964778	1.19357	1.05418	1.11324	0.983916	0.905458	1.04328	1.0331	0.894675	1.26198
Imatinib	10	1.07059	0.980695	1.56511	1.604	1.0094	1.91878	1.11594	1.23857	1.23928	1.03086	1.74411	1.15347	1.02828	1.23333	2.07763	1.00704	1.07166	1.08921	1.41414	1.43182	1.36337	1.22999	1.16283	1.02367	1.11266	1.4053	1.02985	1.01059	1.51983	1.36321	1.03927	1.73031	1.2555	1.58439	0.90881	1.37407	0.899112	1.02306	1.10413	1.01483	1.07668	1.06661	1.05734	1.07391	1.10706	1.1075	1.15976	1.39161
JAK Inhibitor I	10000	0.170196	0.710425	1.01474	0.840934	0.753396	0.852792	0.639911	0.612326	0.939142	0.726508	0.872054	0.508885	0.483896	1.4	0.990868	0.5	0.75037	0.791494	1.55556	0.954545	0.634205	0.772769	0.771382	0.674556	1.10876	0.397727	0.721393	0.508662	1.02296	1.23879	0.691099	0.970599	1.2555	0.758049	0.843895	0.898765	0.122751	0.297978	0.771822	0.38056	0.527089	0.329309	0.396503	0.373012	0.343964	0.51655	1.00237	0.339325
JAK Inhibitor I	2000	0.0823529	0.814672	0.87715	0.778643	0.702194	0.497462	0.67893	0.32008	0.900415	0.412342	0.542088	0.429725	0.515056	1.83333	0.990868	0.471831	0.748297	0.71888	1.06061	0.859091	0.610465	0.792088	0.725329	0.514793	1.08533	0.291667	0.646766	0.522137	0.613779	0.90881	0.578534	0.630127	0.580372	0.566829	0.681607	0.483951	0.165794	0.312877	0.803982	0.524712	0.60101	0.311823	0.274126	0.370004	0.346241	0.488916	0.869822	0.354575
JAK Inhibitor I	400	0.197647	0.826255	0.773956	0.770857	0.526646	0.532995	0.702341	0.904573	0.900415	0.500701	0.589226	0.565428	0.665357	0.666667	0.319635	0.598592	0.860231	0.791494	0.919192	1.16667	0.729167	0.965961	0.771382	0.585799	1.22197	0.503788	0.736318	0.633301	0.4238	0.751932	0.591623	0.6098	0.497462	0.785366	0.703246	0.61358	0.314051	0.454416	0.793262	0.565074	0.764922	0.373022	0.323077	0.526429	0.421412	0.648345	0.770414	0.510893
JAK Inhibitor I	80	0.472157	0.972973	0.894349	0.957731	0.716823	0.604061	0.858417	0.793241	0.755187	0.677419	0.848485	0.836834	0.828489	0.9	0.671233	0.795775	1.10275	1.08195	0.883838	0.795455	0.837694	1.21067	0.978618	0.538462	1.26492	0.82197	0.900498	0.741097	0.803758	0.854714	0.82199	0.625045	1.05415	0.990244	0.90881	0.82963	0.479845	0.739979	0.85758	0.818781	0.970615	0.993755	0.592308	1.06489	0.676538	0.822654	0.811834	0.70915
JAK3	20000	0.691765	0.88417	0.902948	0.942158	1.19227	0.852792	0.764771	0.584493	0.987552	0.71669	0.707071	0.599354	0.68552	0.966667	0.543379	0.478873	0.833284	1.08195	0.919192	0.816667	0.634205	0.367065	0.518092	0.627219	1.28834	-0.0795455	0.512438	0.623195	0.920668	0.730294	0.662304	0.744465	1.05415	1.05854	0.843895	0.846914	0.776361	0.759844	0.696784	0.403624	0.797062	0.76353	0.886014	1.01074	1.05467	0.578196	0.878107	0.27451
JAK3	10000	1.13647	1.00386	0.748157	0.840934	1.02403	0.390863	0.835006	0.640159	0.939142	0.638149	0.659933	0.701131	1.07777	0.733333	1.21461	0.690141	1.02606	1.28527	0.777778	1.06061	0.864826	0.792088	0.529605	0.585799	1.83491	0.238636	0.59204	1.17565	0.832985	0.562597	0.63089	0.592015	1.27919	1.02439	1.03864	0.561728	0.929401	0.829372	0.87902	0.449753	1.04132	0.751873	0.974126	1.36872	1.06378	0.822654	1.06864	0.541394
JAK3	5000	1.08157	1.00386	0.859951	0.911012	0.863114	0.497462	0.928651	0.779324	0.852006	0.628331	0.824916	1.00646	1.21891	1.33333	0.671233	0.852113	1.18567	1.21266	1.13131	1.17727	0.973353	1.04324	0.759868	0.615385	1.7256	0.477273	0.736318	0.879211	0.876827	0.605873	0.735602	0.642831	0.698816	1.12	0.973725	0.509877	0.918242	0.90635	0.921899	0.616969	1.01561	0.600333	0.93007	1.43489	1.28474	0.9587	0.960947	0.949346
JAK3	2500	1.04863	1.04247	0.971744	0.926585	0.885057	0.35533	1.0301	1.08549	0.793914	0.795231	0.659933	1.09693	1.27206	0.9	0.73516	0.943662	1.09861	1.38693	0.813131	0.901515	0.942829	1.25575	1.0477	0.597633	1.94032	0.609848	0.800995	0.828681	0.789144	0.703246	0.780105	0.647913	0.912014	1.16098	1.22257	0.846914	0.954908	0.963462	1.00766	0.813015	0.983471	0.941299	0.959441	1.37172	1.05239	0.977832	1.0355	1.15904
JNJ-7706621	10000	0.507772	0.186667	0.198113	0.00697211	0.189366	3.78161	0.515789	0.28976	0.294038	0.200286	0.349272	0.366856	0.105493	0.692015	0.220126	0.0813953	0.171662	0.214677	0.316742	0.513889	0.10479	0.72213	0.58011	0.386435	0.628352	-0.0460526	0.259259	-0.118506	-0.246479	0.13125	0.156617	0.567832	-0.340974	0.157895	0.0689346	0.674074	-0.0595402	0.0604491	-0.0101597	0.929982	0.0671785	0.0129438	0.0860335	0.0975707	0.0909091	0.0971977	0.170354	0.0478088
JNJ-7706621	1000	1.04577	1.19	1.09434	1.31773	1.26679	1.93103	1.21579	2.10458	1.41328	0.701001	1.09148	0.991501	0.83544	0.26616	1.14465	0.924947	1.20799	2.28478	1.04525	1.04167	1.0514	1.09484	1.36648	0.927445	1.11494	1.17434	0.722222	1.1115	0.361502	0.865278	0.822905	0.93007	0.581662	1.03509	0.620412	0.630864	0.457011	0.614565	0.56894	0.760323	0.896833	0.818047	1.40782	0.719235	0.911157	0.929563	1.04535	1.53386
JNJ-7706621	100	1.0095	0.948889	0.924528	0.885458	1.18843	1.04598	1.16974	1.15904	1.58401	1.13162	1.25156	1.09065	0.971561	1.03802	1.49686	0.87315	1.09143	1.47207	1.17195	1.15278	0.890719	1.13561	1.44383	0.98817	0.977011	0.782895	0.987654	1.05429	0.575117	0.311111	1.00872	0.927622	1.24355	1	0.50761	0.7	0.835172	0.894646	0.792453	0.898564	1.12524	0.996672	0.997207	1.01474	1.03512	0.947236	1.32412	1.16335
JNJ-7706621	10	1.11831	1.13167	1.20755	0.808765	1.14272	1.04598	1.225	1.15904	1.55556	1.28183	1.23701	0.971671	0.99368	0.931559	1.62893	1.08034	1.03633	1.28039	1.39367	1.33333	0.953593	1.00458	1.46961	0.98817	0.862069	0.990132	0.932099	0.858144	0.821596	0.977083	0.881305	1.14301	6.27794	2.92982	0.708147	0.916049	0.873793	0.9692	0.965167	1.06822	1.1118	1.07951	1.08715	0.992433	1.0186	0.998485	1.49447	1.10359
JNK II	50000	0.217617	0.754444	1.56604	0.515936	0.803172	2.97701	1.05921	0.960784	0.920054	0.610873	0.742204	0.376771	0.117404	0.39924	1.54088	0.288584	0.580684	0.996714	1.80543	0.222222	0.282934	0.914309	0.915285	0.932965	0.62069	0.253289	0.432099	0.151197	1.82394	0.427778	0.615851	0.396503	0.722063	0.394737	0.213071	2.19506	0.0595402	0.225676	0.365747	0.716338	0.214971	0.222633	0.195531	0.262047	0.225207	0.316334	0.665929	0.223108
JNK II	10000	0.658895	0.812778	0.801887	0.578685	1.10354	0.885057	0.810526	0.793028	0.863144	0.951359	0.829522	1.00142	0.695916	0.292776	0.528302	0.717759	1.01514	1.71742	0.855204	0.847222	0.674152	0.841514	1.08287	0.811514	1.0728	0.875	0.660494	0.792761	0.607981	0.768056	0.979522	0.663287	0.22063	0.859649	0.570278	1.27037	0.51977	0.634715	0.833091	0.590664	0.762476	0.732618	0.582682	0.515731	0.760331	0.706892	0.905973	1.15139
JNK II	2000	1.70466	0.878889	0.811321	0.641434	0.620336	0.643678	0.930263	0.899782	0.644986	0.841202	0.800416	1.13031	0.894993	0.612167	0.572327	0.924947	1.0554	1.28039	0.475113	0.708333	0.691617	1.08902	1.27624	0.883281	1.11494	0.552632	0.876543	0.866316	0.476526	0.675694	1.05385	0.651049	0.461318	0.885965	0.438675	0.967901	0.794943	0.918826	1.01597	0.697487	0.900192	0.823225	0.840782	0.786141	0.85124	1.01086	0.94469	1.0757
JNK II	400	1.16667	0.945	0.801887	0.75996	0.816231	0.804598	0.847368	1.05229	0.995935	0.831187	0.989605	1.08074	0.927321	1.03802	1.27673	0.850951	1.08295	1.01972	0.760181	0.791667	0.66018	1.1589	1.58564	0.993691	1.03065	0.990132	0.888889	0.931699	0.377934	0.695139	1.11225	0.648601	0.461318	0.991228	0.614145	0.916049	0.996092	0.993379	1.1074	1.36984	0.96737	0.89571	0.840782	0.872561	0.913223	0.93133	0.983407	0.948207
KN92	10000	0.646805	0.684444	0.971698	1.41534	0.744403	-0.0804598	0.718421	0.83878	1.34688	0.420601	0.43659	0.912181	0.826932	1.19772	0.924528	0.51797	0.775658	1.3034	0.9819	0.722222	0.653194	0.885191	1.0442	0.645899	1.37931	0.690789	0.611111	0.90718	0.328638	0.724306	0.939704	0.584965	0.441261	0.578947	0.426141	0.630864	0.197931	0.481577	0.0101597	0.584381	0.698656	0.719675	0.148603	0.420948	0.681818	0.692754	0.89823	0.87251
KN92	1000	0.906736	0.886667	0.877358	0.871514	0.718284	1.12644	0.948684	0.991285	0.920054	1.01144	1.06237	1.07082	0.906903	1.62357	1.71698	0.850951	1.04057	1.18839	0.918552	1.25	0.862774	1.03078	1.4825	0.712145	1.11494	0.690789	0.944444	0.984822	0.624413	0.675694	1.12021	0.562937	0.481375	0.807018	0.595345	0.708642	0.806207	0.920841	0.782293	0.697487	0.974088	0.468565	0.832961	0.86141	0.913223	0.869477	1.16925	1.15538
KN92	100	1.3057	0.913889	1.13208	1.10857	1.0709	1.04598	1.19737	1.22004	1.35637	1.10157	1.03326	1.11048	0.896694	1.30418	1.93711	0.902748	1.06176	1.21906	1.07692	1.52778	0.91517	1.1327	1.55985	0.734227	1.15709	0.828947	0.95679	1.00117	0.476526	0.340278	1.26356	0.682867	1.2235	0.842105	0.72068	0.846914	0.92046	0.934945	0.792453	0.942549	1.1118	0.828402	0.836872	0.880924	0.997934	0.897753	1.38606	1.24303
KN92	10	1.21503	1.12	1.65094	1.10159	1.49534	1.6092	1.23421	1.14379	1.51762	1.13162	1.22245	1.15014	1.03111	1.35741	2.20126	1.02114	1.08931	1.18072	1.45701	1.54167	1.09681	1.09775	1.83057	0.938486	1.14943	0.990132	0.87037	0.841798	0.870892	0.840972	1.0857	1.05734	5.05444	3.16667	0.758281	0.898765	0.854483	1.01353	0.792453	1.02424	1.08829	0.766272	0.879888	0.92274	0.987603	1.02323	1.64934	1.27888
KN93	10000	1.02763	0.878889	0.792453	1.28287	0.848881	0.885057	0.782895	1.37255	0.929539	0.781116	0.683992	1.01133	0.826932	0.505703	1.18868	0.976744	0.934605	1.12705	0.823529	0.958333	0.824351	1.05408	1.37937	0.833596	1.17625	0.875	0.666667	0.886748	0.50939	0.865278	1.04854	0.611888	0.381089	0.859649	0.325873	0.61358	0.762759	0.816062	0.772134	0.716338	0.886756	0.732618	0.903352	1.16806	0.92562	0.546074	0.890487	0.776892
KN93	1000	1.12435	0.933333	0.915094	1.10159	0.809701	0.804598	0.994737	1.3878	1.21409	0.821173	1.35343	1.08074	0.947739	1.41065	1.98113	0.843552	1.06176	1.24973	0.918552	1.29167	0.932635	1.15308	1.59853	0.805994	1.09962	0.898026	0.901235	0.972563	0.591549	0.875	1.12818	0.602098	0.722063	0.877193	0.658013	0.769136	0.914023	0.918826	0.802612	0.9614	1.08493	0.898299	0.836872	0.841896	0.913223	0.639737	1.13827	1.33466
KN93	100	1.08808	0.948889	1.01887	1.19223	0.940299	0.804598	1.36316	1.17429	1.21409	1.16166	1.17879	1.1204	0.978367	1.03802	2.06918	0.910148	1.09143	1.3264	1.01357	1.26389	0.953593	1.15017	1.54696	0.850158	1.15709	0.828947	0.975309	0.939872	0.542254	0.359722	1.1733	0.695105	1.02292	0.964912	0.632945	0.846914	0.965517	1.04174	0.822932	1.01795	1.05806	0.797337	0.942458	0.864198	1.00207	0.811159	1.37058	1.09562
KN93	10	1.23921	1.05	1.29245	1.04582	1.65205	1.77011	1.14211	1.03704	1.24255	1.29185	1.10603	1.24929	0.949441	1.49049	3.08176	1.11734	1.15713	1.22673	1.14027	1.54167	1.03743	1.07446	1.6372	0.977129	1.01916	0.921053	0.944444	0.903094	0.805164	1.01597	1.07509	1.03531	5.79656	2.57018	0.770815	0.924691	0.852874	0.96517	0.934688	1.16248	1.09165	1.03033	1.13017	0.995221	1.04545	1.09038	1.68805	1.38645
Lapatinib	10000	0.385267	0.355043	0.573048	0.358108	1.18258	0.172131	0.245484	0.42459	0.323077	0.436975	0.607375	0.174184	0.180489	0.597156	-0.44	0.306952	0.598255	0.257968	0.400673	0.368421	0.271093	0.461538	0.454683	0.411424	0.0925481	0.4811	0.758932	1.1659	0.825472	0.726307	0.653396	0.572954	0.793201	0.472973	0.67784	0.908864	0.313028	0.841507	0.292848	0.15808	0.370242	0.303681	0.312824	0.10168	0.463475	0.722551	0.558603	0.258836
Lapatinib	1000	0.972058	0.810951	0.811083	1.01351	1.0447	0.860656	0.714134	0.780328	0.673077	0.714286	0.789588	0.968896	0.961988	1.12796	0.72	0.860963	0.998495	1.12948	0.73064	0.820034	0.939142	0.923077	0.91994	0.695364	1.1274	0.601375	0.914168	1.05115	0.544811	0.726307	0.798595	0.593335	0.694051	0.908108	0.716946	0.769039	0.774584	0.866627	0.887989	0.617502	1.01384	0.95092	0.96114	0.819791	0.970999	0.991782	0.933915	0.864057
Lapatinib	100	0.806097	0.891643	0.837531	0.831081	0.668182	0.516393	0.855473	0.998361	0.664103	1.0084	0.713666	1.00156	0.948963	0.630332	0.4	0.845989	1.06169	1.01793	0.565657	0.760611	0.890733	0.89011	0.856495	0.735927	1.00541	0.841924	0.905544	1.09246	0.759434	0.651961	0.88993	0.534455	0.723796	0.87973	0.977654	0.725343	0.717089	0.8436	1.0108	0.736062	0.934256	0.588957	0.974741	0.880163	1.02079	0.920447	0.899002	0.886895
Lapatinib	10	0.918713	0.9683	0.837531	1.02027	0.710606	0.631148	0.766206	1.31967	0.879487	1.36134	0.86551	1.09953	1.02153	1.55924	1.36	0.973262	1.05327	1.21315	0.754209	0.760611	0.861687	1.05495	1.00453	0.77649	1.09796	0.841924	0.925667	1.03738	0.693396	0.777778	0.810304	0.529926	0.932011	0.945946	1.14711	0.821473	0.728268	0.925239	0.944669	0.701482	0.923875	0.98773	1.21503	0.97231	1.06101	0.92735	0.9601	1.10386
LY-333531	10000	0.106689	0	0.537783	0.108108	0.556818	-0.057377	0.00743889	0.218033	0.269231	0.268908	0.577007	0.0870918	0.169325	1.06161	-0.16	0.157219	0.0400241	0.0766932	0.424242	0.0713073	-0.00322729	0.115385	0.422961	0.0115894	-0.0126202	0.120275	0.603696	0.197377	0.841981	-0.0571895	0.386417	0.235522	0.713881	0.444595	0.0782123	0.515605	-0.0622861	0.498206	0.103914	0.266761	0.972318	0.668712	0.0725389	0.0953246	0.597538	0.706443	0.0174564	0.129418
LY-333531	1000	0.723116	0.609222	1.0932	0.736486	0.519697	-0.286885	0.498406	0.768852	1.09487	0.739496	0.4859	1.07776	0.729399	0.563981	0.24	0.464171	0.872104	1.28287	0.824916	0.879457	0.487321	0.587912	0.528701	0.637417	0.731971	0.52921	0.776181	0.56	0.627358	0.560458	0.65808	0.489162	0.773371	0.775676	0.703911	0.594257	0.448779	0.772428	0.188934	0.513761	0.795848	0.788344	0.439767	1.3123	0.903967	0.614398	0.899002	0.414899
LY-333531	100	0.995766	0.883573	1.25189	1.00676	1.03409	0.516393	0.922423	0.940984	1.13974	0.781513	0.911063	1.13219	0.859649	1.49289	1.08	0.539037	0.996389	0.99004	1.03704	0.962649	0.651913	0.873626	0.930514	0.840232	0.782452	0.769759	0.922793	0.904262	0.974057	0.70915	0.803279	0.572954	0.991501	1.0027	1.36872	0.908864	0.571755	0.86872	0.859649	0.731122	0.920415	0.834356	0.539508	0.861099	0.8829	0.800789	0.890274	0.612833
LY-333531	10	1.28027	0.923919	1.39295	0.864865	0.959848	0.459016	0.907545	0.84918	1.09487	0.89916	1.01735	1.01244	0.896863	0.895735	1.16	1.04064	1.01535	1.01096	1.34343	1.03396	0.819733	2.44505	0.941088	0.990894	0.929688	0.841924	0.942916	1.05574	1.08962	0.960784	0.744731	0.826593	1.19972	0.955405	1.22533	1.27591	0.731462	1.02362	0.821862	0.775582	0.965398	0.93865	0.988342	0.981843	1.02079	0.849112	1.08229	1.00489
LY294002	50000	0.00604491	0.0777778	0.292453	0.446215	0.470149	0	0.276316	0.228758	0.588076	0.250358	0.247401	0.188385	0.00510452	0.13308	-0.176101	2.04228	0.0678171	-0.0153341	0.0316742	0.388889	-0.0279441	0.771631	-0.244936	0.723186	0.111111	0.0690789	0.222222	-0.0572096	0.443662	0.209028	0.331816	0.117483	0.0200573	0.131579	0.0188004	0.820988	-0.082069	0.0443293	0.182874	0.157092	0.0772553	0.0310651	0.0195531	0.0641179	0.0847107	0.00883615	0.278761	0.0517928
LY294002	10000	0.247841	0.587222	0.40566	0.697211	0.901119	0.402299	0.571053	0.228758	0.701897	0.58083	0.654886	0.584986	0.195673	0.319392	0.308176	0.340381	0.525583	0.429354	0.60181	0.611111	0.314371	0.934692	0.309392	0.844637	0.363985	0.483553	0.283951	0.359603	0.0328638	0.247917	0.690178	0.35979	0.260745	0.552632	0.169203	0.803704	0.281609	0.366724	0.243832	0.282765	0.362764	0.52034	0.164246	0.236957	0.493802	0.120172	0.766593	0.183267
LY294002	2000	0.683074	0.731111	0.54717	0.75996	0.561567	0.321839	0.736842	0.594771	0.701897	0.610873	0.640333	0.832861	0.626155	0.239544	0.176101	0.673362	1.03421	0.720701	0.475113	0.722222	0.667166	1.04534	0.915285	0.739748	0.701149	0.0921053	0.376543	0.792761	0.246479	0.140972	0.897232	0.420979	0.22063	0.701754	0.275739	0.639506	0.53908	0.668969	0.548621	0.546679	0.708733	0.748151	0.469274	0.691358	0.876033	0.553143	0.751106	0.601594
LY294002	400	1.51123	0.847778	0.764151	0.997012	0.972948	0.563218	0.847368	1.17429	1.19512	1.17167	0.945946	0.991501	0.905202	0.26616	1.10063	0.843552	1.13382	0.950712	0.791855	0.902778	0.845309	1.06281	1.43094	0.87776	1.17241	0.391447	0.796296	0.952131	0.394366	0.806944	0.995449	0.636364	0.882521	0.868421	0.50761	1.09753	0.946207	0.876511	0.87373	0.992819	0.893474	0.740385	1.41955	0.844683	0.981405	0.894219	0.905973	1.01195
MEK1/2	10000	0.634715	0.754444	1.00943	0.648406	0.927239	1.28736	1.02237	0.854031	0.673442	0.771102	0.814969	0.872521	0.634662	0.425856	0.968553	0.688161	0.868907	0.483023	0.760181	1	0.597305	0.984193	1.36648	1.01577	0.873563	0.759868	0.753086	0.535318	0.723005	0.870139	0.979522	0.643706	1.38395	0.666667	0.476276	0.846914	0.643678	0.548071	1.14804	0.741472	0.288868	0.10355	0.437989	0.568698	0.669421	0.418834	0.689159	0.61753
MEK1/2	2000	1.03972	0.867222	0.858491	0.808765	1.05784	1.44828	0.921053	1.06754	0.626016	0.831187	0.698545	0.951841	0.866067	0.186312	0.0880503	0.806554	0.972752	0.812705	0.918552	0.791667	0.796407	1.03369	1.40516	1.01577	0.957854	0.967105	0.802469	0.886748	0.377934	0.797222	1.05916	0.658392	0.421203	0.640351	0.470009	0.561728	0.782069	0.890616	1.01597	0.842011	0.84309	0.248521	0.793855	0.766627	0.855372	0.668013	0.789823	0.828685
MEK1/2	400	1.04577	0.906111	0.886792	1.25498	1.19496	0.965517	0.921053	1.03704	0.635501	0.811159	0.713098	1.03116	0.886485	0.452471	0.528302	0.843552	1.02573	0.927711	0.950226	0.583333	0.911677	1.03369	1.41805	0.938486	1.10728	0.782895	0.858025	1.05429	0.558685	0.738889	1.16799	0.597203	0.401146	0.859649	0.463742	0.509877	0.86092	0.95308	1.06676	1.08079	0.829655	0.326183	0.754749	0.978495	0.896694	0.763444	0.78208	1.62948
MEK1/2	80	1.35406	0.941111	0.877358	1.03884	0.672575	0.965517	1.24342	1.31155	0.872629	0.801144	1.09148	1.05099	0.961351	0.452471	1.18868	1.02114	1.02785	1.05805	0.855204	0.833333	0.939621	1.04243	1.6372	0.960568	1.09579	0.921053	0.944444	1.10741	0.34507	0.709722	1.12552	0.660839	0.661891	0.95614	0.632945	0.846914	0.952644	0.94502	1.01597	1.36355	0.920345	0.509985	0.911173	0.830745	0.942149	0.910124	0.960177	1.37849
MLN-518	10000	0.680784	0.745174	0.928747	0.98109	0.768025	0.497462	0.647715	0.445328	0.929461	0.539972	0.73064	0.31664	0.566379	0.5	0.607306	0.253521	0.737933	1.03112	0.813131	0.827273	0.579942	0.270469	0.495066	0.698225	1.27273	0.397727	0.542289	0.501925	1.22756	1.09815	0.814136	0.652995	1.00677	0.880976	0.876352	0.820988	0.738101	0.916282	0.568147	0.438221	1.14738	1.29684	0.553147	0.457241	0.637813	0.637716	1.01065	0.819717
MLN-518	1000	0.927843	0.880309	0.825553	1.24583	0.892372	0.532995	0.850613	0.473161	0.842324	0.638149	0.73064	0.633279	0.874313	0.566667	0.863014	0.373239	0.897542	0.994813	1.13131	0.869697	0.820736	0.347746	0.771382	0.704142	1.17122	0.715909	0.706468	0.552454	1.13987	0.870943	0.848168	0.724138	0.864636	0.771707	0.735703	0.803704	0.865634	0.99326	0.932619	0.495881	0.951331	0.874271	0.518881	0.724968	0.708428	0.792894	0.969231	0.720588
MLN-518	100	0.757647	0.872587	0.851351	0.988877	0.789969	0.497462	1.06912	0.751491	0.66805	0.697055	0.659933	0.904685	0.976957	0.5	0.511416	0.549296	0.941072	0.922199	0.989899	0.975758	0.85126	0.689052	0.875	0.591716	1.15561	0.477273	0.800995	0.677093	0.511482	0.692427	0.89267	0.693648	0.544839	0.874146	0.551777	0.639506	0.929401	0.936148	0.87902	0.576606	1.05096	0.670275	0.827273	0.83627	0.8041	0.897054	0.977515	0.995098
MLN-518	10	0.84549	0.911197	0.902948	1.31591	1.0094	0.604061	1.07692	0.918489	1.35546	0.785414	0.754209	1.09693	1.02461	1.16667	0.703196	0.788732	1.09446	0.973029	0.636364	0.922727	0.861434	1.25575	0.978618	0.710059	1.31958	0.92803	0.950249	0.774783	0.847599	0.806028	0.97644	0.741924	0.840948	1.07902	0.952087	1.09753	1.06809	0.941114	0.975498	1.04942	1.00275	0.620733	0.964336	0.908466	0.865604	0.897054	1.04379	1.34205
MLN-8054	10000	1.57168	0.906111	0.688679	0.948207	0	0	0.902632	0.930283	0.701897	0.460658	0.902287	0.862606	0.884784	1.22433	1.2327	0.673362	0.80109	1.26506	0.665158	0.833333	0.436627	0.920133	1.14733	0.723186	1.01533	0.552632	0.641975	1.03795	0.443662	0.646528	0.942359	0.68042	-2.54728	-0.517544	-0.570278	0.78642	0.651724	0.66494	0.609579	0.640934	0.678503	0.326183	0.915084	1.14018	0.878099	1.13103	0.820796	0.788845
MLN-8054	1000	0.930915	0.964444	0.830189	0.655378	0	0.241379	0.838158	1.12854	0.796748	0.680973	1.14969	0.842776	0.964754	0.532319	1.98113	0.717759	0.756585	1.26506	0.918552	0.902778	0.57984	1.03369	1.30203	0.76735	0.888889	0.782895	0.746914	0.96439	0.262911	0.631944	1.00076	0.609441	-7.4212	-0.614035	-0.726947	0.820988	0.622759	0.771733	0.843251	0.986535	0.903551	0.753328	0.875978	1.00916	0.969008	0.980813	0.99115	0.972112
MLN-8054	100	0.92487	1.00333	0.933962	1.00398	0	0.563218	0.985526	1.14379	1.4607	1.09156	1.33888	1.09065	0.913709	1.1711	1.54088	0.887949	1.03633	1.31873	0.823529	1.33333	0.86976	1.17055	1.44383	0.894322	1.03831	0.828947	1.01852	0.992995	0.50939	0.272222	1.0857	0.790559	-7.4212	-0.631579	-0.695613	0.941975	0.833563	0.92487	0.995646	1.07451	1.07821	0.913831	0.95419	0.811231	1.06198	0.986115	1.32412	1.23108
MLN-8054	10	1.22107	1.08111	1.01887	0.864542	0.00652985	0.885057	1.09605	1.00654	1.48916	1.22175	1.17879	1.11048	0.969859	1.09125	1.84906	0.998943	1.02997	1.22673	1.20362	1.13889	0.855788	1.03661	1.67587	0.949527	0.900383	1.01316	0.783951	0.899008	0.838028	0.923611	0.987486	1.05979	-7.64183	-0.27193	-0.827216	0.941975	0.893103	0.934945	0.88389	1.1939	1.08157	1.0355	0.958101	0.98407	1.05992	1.07448	1.50996	1.21514
NF-kB	10000	0.592941	0.749035	1.05774	0.802002	1.11181	0	0.702341	0.807157	0.910097	0.471248	0.117845	0.689822	0.522388	2.13333	0.703196	0.28169	0.733787	1.53216	0.848485	1.2197	0.525678	0.779209	0.621711	0.443787	1.01115	0.106061	0.492537	0.53898	0.467641	0.281298	0.646597	0.625045	0.248731	0.498537	0.411128	0.674074	0.302892	0.528911	0.085758	0.495881	1.21166	0.952956	0.93986	0.40911	0.562642	0.890677	0.588166	0.922658
NF-kB	1000	0.587451	0.853282	1.33292	1.06674	0.746082	0.604061	0.897436	0.821074	0.97787	0.765778	0.400673	0.972536	0.762503	1.66667	0.767123	0.507042	0.810483	1.43776	0.318182	1.49545	0.640988	0.953082	0.771382	0.573964	1.48745	0.318182	0.621891	0.602984	0.453027	0.416538	0.774869	1.30599	0.62775	0.47122	0.64915	0.630864	0.459121	0.670451	0.343032	0.628501	0.906336	1.07244	0.513986	0.607649	0.753986	0.756757	0.671006	1.05229
NF-kB	100	0.84549	0.853282	1.20393	1.26919	0.899687	0.675127	0.866221	0.904573	0.997234	0.903226	0.612795	1.15347	0.768002	2.03333	1.05479	0.626761	0.829138	1.42324	1.09596	1.5697	0.732558	0.779209	0.875	0.692308	1.45231	0.265152	0.646766	0.744466	0.730689	0.535549	0.790576	1.39746	0.509306	0.64878	0.843895	0.7	0.510134	0.782192	0.332312	0.640033	1.00275	1.26769	0.881119	0.628706	0.8041	0.731248	0.737278	1.22004
NF-kB	10	0.922353	0.907336	1.44472	1.10567	0.943574	1.27919	0.889632	0.83499	1.20055	0.913043	0.989899	0.915994	0.79183	1.46667	1.05479	0.922535	0.806337	1.42324	1.20202	1.05	0.912306	0.669733	0.828947	0.869822	1.47964	0.450758	0.731343	0.61309	0.759916	0.665379	0.887435	1.33394	0.935702	0.805854	1.03864	0.916049	0.471874	0.834338	0.471669	0.789951	0.883838	1.18901	0.793007	0.610657	0.84738	0.82478	0.80355	1.2963
Nilotinib	10000	0.999216	0.362934	0.70516	1.51057	0.650993	0.390863	0.351171	0.32008	0.735823	0.215989	0.329966	0.452342	0.18696	0.633333	1.75799	0.429577	0.791827	0.914938	0.742424	0.583333	0.549419	1.069	0.172697	0.502959	0.972114	0.450758	0.437811	0.501925	0.555324	0.557187	0.445026	0.358258	0.153976	0.792195	-0.119011	0.604938	0.218401	0.670451	0.289433	0.311367	0.78742	0.786844	0.0734266	0.183498	0.243736	0.301852	0.613018	0.0800654
Nilotinib	1000	1.61412	0.532819	0.954545	1.46385	0.936259	0.639594	0.694537	1.29423	0.919779	0.657784	0.848485	1.33441	0.656193	1.23333	1.85388	0.598592	0.957655	1.61203	1.06061	1.2197	0.878391	1.03036	0.564145	0.585799	1.03458	0.82197	0.706468	0.794995	0.920668	0.746522	0.706806	0.975681	0.485618	0.983415	0.540958	0.734568	0.465498	0.367506	0.643185	0.657331	0.716713	0.335137	0.381818	0.421143	0.318907	0.53143	0.952663	0.449891
Nilotinib	100	1.87216	0.822394	0.86855	1.65072	1.4629	0.852792	0.998885	1.57256	1.52006	0.824684	1.367	1.23263	0.907306	1.13333	2.07763	0.788732	1.02191	1.94606	1.44949	1.41061	1.00727	1.12695	0.909539	0.704142	1.12828	0.875	0.920398	0.980269	1.06681	0.854714	0.963351	1.24247	0.876481	1.48878	0.703246	0.725926	1.05534	0.956013	0.954058	1.3089	1.16667	1.11032	0.812587	0.911474	0.922551	0.78014	1.20947	1.41449
Nilotinib	10	1.35059	0.918919	1.27273	1.53393	1.2581	1.10152	1.04571	0.974155	1.21024	1.13885	1.10774	1.08562	1.00812	1.03333	1.85388	0.894366	1.00118	1.53216	1.34343	0.912121	1.13275	1.0368	0.990132	0.893491	1.01896	0.92803	1	0.983638	1.06681	1.017	1.00262	1.45336	1.12521	1.48195	0.973725	0.898765	0.993168	1.05286	0.911179	0.89374	1.16988	1.0637	1.07203	1.10099	1.02733	0.829031	1.1929	1.27723
p38	10000	0.791883	0.478333	1.06604	0	0.972948	0	1.07763	0.976035	0.920054	0.72103	0.91684	0.882436	0.774186	0.718631	0.704403	0.784355	1.02785	0.958379	0.791855	1.20833	0.768463	1.05699	0.825046	1.02681	0.298851	0.828947	0.925926	0.739638	0.953052	1.03056	0.926432	0.915385	1.10315	0.964912	0.589078	0.916049	0.595402	0.30829	0.924528	0.82316	0.621401	0.442678	0.324581	0.7499	0.605372	0.842969	0.94469	0.370518
p38	1000	1.02159	0.754444	0.754717	0	1.22108	0.885057	0.939474	1.14379	0.806233	0.79113	0.800416	0.971671	0.826932	0.851711	0.572327	0.850951	1.03421	0.935378	0.538462	1.41667	0.705589	0.952163	1.13444	0.87224	0.295019	0.851974	0.802469	0.911267	0.591549	0.782639	0.955631	0.636364	0.200573	0.798246	0.726947	0.760494	1.04598	0.805987	1.01597	0.936266	0.826296	0.341716	0.594413	0.864198	0.842975	0.880081	0.929204	0.52988
p38	100	1.44473	0.937222	0.801887	0	0.901119	0.724138	0.948684	1.03704	0.929539	0.93133	0.785863	0.991501	0.935829	0.479087	0.660377	0.850951	1.02361	1.01205	0.316742	1.25	0.712575	1.09484	1.52118	1.01577	0.463602	0.782895	0.888889	0.988908	0.591549	0.734028	0.942359	0.663287	0.52149	0.798246	0.576544	0.74321	0.981609	1.02965	1.00581	0.999102	0.957294	0.429734	0.868156	1.03425	0.900826	0.929563	0.820796	0.98008
p38	10	1.45078	0.960556	0.820755	0.00697211	1.01213	0.885057	1.01316	1.22004	0.749322	0.961373	1.17879	1.04108	0.954545	0.372624	1.10063	0.88055	1.15289	1.09639	0.791855	0.930556	0.646208	1.06864	1.50829	0.955047	0.421456	0.782895	0.907407	0.894921	0.312207	0.7	1.00607	0.746503	0.621777	0.859649	0.576544	0.838272	0.967126	1.07196	0.944848	1.24417	0.964012	0.774038	1.00112	0.917164	0.948347	0.975511	1.06858	0.916335
PCI 32765	10000	0.785098	0.837838	0.541769	1.00445	0.672936	0.177665	0.51505	0.612326	1.02628	0.628331	0.542088	0.282714	0.68552	0.533333	0.894977	0.535211	1.0613	1.95332	0.671717	0.890909	0.634205	0.360626	0.449013	0.467456	1.38985	0.291667	0.378109	0.532243	0.263048	0.167697	0.704188	0.421779	0.43824	0.491707	0.270479	0.61358	0.543612	0.337708	0.225115	0.288303	1.17952	0.410908	0.420979	0.333906	0.76082	0.658974	0.994083	0.369826
PCI 32765	1000	1.30667	0.988417	0.851351	1.12903	0.768025	0.639594	0.928651	1.00199	1.07469	0.863955	0.895623	1.19871	0.883477	0.8	0.894977	0.859155	1.06337	1.50311	0.989899	1.19848	0.929264	1.29439	1.07072	0.64497	1.26882	0.875	0.731343	0.720885	0.701461	0.676198	0.971204	0.508167	0.935702	0.983415	0.941267	0.769136	0.701435	0.804541	0.803982	1.21664	1.04775	0.565362	0.71958	0.658788	1.10478	0.790768	1.42485	0.739651
PCI 32765	100	1.16941	1.10811	1.20393	1.34705	0.965517	0.71066	1.07692	1.40557	1.18119	0.755961	1.53199	1.42488	0.870647	1.1	1.3105	1.14789	1.01569	1.29253	1.41414	1.19848	0.925872	1.22999	1.08224	0.786982	1.25321	0.768939	0.820896	0.784889	0.759916	0.714065	0.992147	0.706352	0.900169	1.06537	0.659969	0.846914	0.781143	0.876552	0.900459	1.2397	1.02204	0.53622	0.822378	0.77009	1.14806	0.829031	1.25917	0.976035
PCI 32765	10	1.26275	1.21236	1.7543	1.28476	1.18495	1.49239	1.00669	1.22465	1.27801	1.06031	1.46128	1.27787	0.888976	1.16667	1.72603	1.15493	1.11519	1.15456	1.27273	1.12424	1.17006	1.11408	1.09375	0.698225	1.20636	0.82197	0.825871	0.83205	0.949896	1.17388	1.12304	1.16624	1.12521	1.19512	0.941267	0.924691	0.637668	0.884001	0.8683	1.14745	1.18595	0.772273	0.964336	0.842286	1.2574	0.8843	1.46627	1.1171
PCI 33918	10000	0.647843	0.285714	0.550369	0.864294	0.650993	0.532995	0.764771	0.375746	0.764869	0.284712	0.518519	0.203554	0.399581	1.03333	0.83105	0.232394	0.795973	1.81535	0.388889	0.827273	0.227229	0.122355	0.264803	0.248521	0.835471	-0.132576	0.378109	0.262753	0.306889	0.183926	0.565445	0.332849	0.130288	0.573659	-0.281298	0.630864	0.0159417	0.0744945	0.0750383	0.167216	0.861341	0.285595	0.0538462	0.11431	0.179954	0.420893	0.63787	0.114379
PCI 33918	1000	0.872941	0.555985	0.70516	0.778643	0.394984	0.568528	0.913043	1.16899	0.832642	0.481066	0.589226	0.870759	0.581042	0.866667	0.703196	0.422535	0.916198	1.03838	0.848485	0.890909	0.637597	0.611776	0.391447	0.556213	1.03458	0.636364	0.542289	0.326756	0.584551	0.421947	0.751309	0.289655	0.307953	0.771707	0.194745	0.708642	0.293327	0.156438	0.471669	0.501647	0.915978	0.367194	0.186014	0.282768	0.448747	0.51655	0.936095	0.259259
PCI 33918	100	1.32314	0.72973	1.03194	1.38598	0.716823	0.604061	1.06132	1.6839	1.07469	0.697055	1.76768	1.21002	0.833988	0.9	1.18265	0.753521	0.994966	0.994813	1.59091	1.12424	0.919089	1.0368	0.725329	0.721893	1.13218	0.768939	0.746269	0.640038	0.789144	0.719474	1.02094	0.546279	0.888325	0.92878	1.37403	0.846914	0.736506	0.824406	0.846861	1.17051	1.03168	0.472107	0.425874	0.715943	0.71754	0.767385	1.13491	0.632898
PCI 33918	10	1.24627	1.07336	1.42752	1.30812	1.11912	0.675127	1.07692	1.12724	1.20055	1.15849	1.55556	1.21002	0.954962	1.73333	1.69406	1.21831	1.12141	1.1473	1.37879	1.29394	1.01405	0.978841	0.967105	0.781065	1.21026	1.06061	0.850746	0.683831	0.847599	1.11437	1.06283	1.2196	1.27919	1.20878	1.16847	0.898765	0.715782	1.03796	0.8683	0.899506	1.03811	0.827644	0.748951	0.91749	0.879271	0.956575	1.22604	1.16667
PD153035	500	0.900931	0.806916	1.19018	0.817568	0.917424	0.172131	0.914984	0.837705	0.852564	1.05882	0.941432	0.261275	0.411217	0.398104	-0.12	0.658824	0.671983	0.432271	0.589226	0.487267	1.52006	0.972527	0.993958	0.863411	0.466947	0	1.00616	2.61639	1.15566	0.543301	1	0.28308	0.902266	1.34324	0.586592	0.742821	0.554187	0.607057	0.481781	0.839802	1.51557	1.29448	1.3737	1.16931	1.11655	1.14826	0.925187	1.1838
PD153035	50	1.81964	1.34755	1.20781	1.26351	1.73939	-0.172131	1.26461	0.963934	0.771795	0.798319	0.911063	0.446345	1.28203	0.696682	3.28	0.958289	1.00481	1.68028	0.73064	0.891341	1.1231	1.05495	1.06798	0.753311	1.18209	0.62543	1.05216	7.10098	0.445755	0.823529	1.06323	0.638628	0.753541	1.33378	0.821229	0.94382	0.999772	1.02781	0.840756	0.696542	1.43599	1.26994	0.970207	0.940536	1.03803	1.42669	1.2394	1.51876
PD153035	5	1.36325	1.04496	0.943325	0.959459	0.970455	0.344262	1.13815	1.07869	0.915385	0.823529	0.683297	0.92535	1.12573	0.49763	1.44	0.793583	0.97743	1.11554	0.872054	0.594228	0.990779	1.02198	0.909366	0.706954	0.996995	0.890034	0.991786	1.4459	0.511792	0.680556	0.98829	1.07117	0.694051	1.05	1.04283	0.769039	0.97901	1.00897	1.02969	0.879323	1.11419	0.917178	0.933938	0.934181	0.961423	0.982577	1.00374	1.0696
PD153035	0.5	1.11431	1.00058	0.90806	1.0473	0.853788	0.688525	0.981934	1.3082	1.33718	1.02521	0.774403	0.92535	1.0327	0.696682	1	0.988235	1.04484	1.12251	0.824916	0.629881	0.884278	1.08791	1.19486	0.77649	1.10637	1.10653	0.95729	1.34492	0.841981	0.834967	0.946136	1.13911	0.813031	1.17297	1.08194	0.812734	0.82569	0.954545	0.916329	1.03246	0.986159	0.883436	0.983808	0.975488	0.946101	0.973373	1.01247	1.10005
PD98059	10000	0.689119	0.571667	1.0566	0.843625	1.30597	2.01149	1.15132	1.00654	0.939024	0.901288	0.742204	1.24929	0.498542	0.346008	0.880503	0.739958	1.03845	0.674699	0.918552	0.777778	0.796407	1.21131	1.37937	1.15931	1.39464	0.898026	0.740741	0.747811	1.08451	1.03542	0.921122	0.58986	1.12321	0.754386	0.432408	0.898765	0.50046	0.407024	1.04644	0.571813	0.181382	0.0802515	0.269832	0.423736	0.56405	0.37642	0.681416	0.836653
PD98059	5000	0.864421	0.707778	0.773585	1.04582	1.12313	1.12644	0.957895	1.2658	0.730352	0.981402	0.683992	1.27904	0.592124	0.372624	0.528302	1.14693	1.12958	0.77437	0.696833	0.875	0.723054	1.22005	1.13444	0.98265	1.19923	0.921053	0.845679	0.874489	0.50939	0.904167	1.10694	0.462587	0.401146	0.719298	0.476276	0.483951	0.60023	0.650835	0.87373	0.63465	0.389635	0.10355	0.418436	0.485066	0.661157	0.546074	0.75885	0.832669
PD98059	2500	1.11226	0.692222	0.764151	0.836653	0.737873	1.04598	0.755263	1.34205	0.673442	0.921316	0.742204	1.44759	0.639767	0.106464	0.572327	0.984144	1.05117	0.812705	0.665158	1.04167	0.744012	1.12396	1.32781	0.927445	1.13027	0.483553	0.839506	0.813193	0.394366	0.719444	1.0857	0.452797	0.340974	0.710526	0.407341	0.61358	0.654943	0.687104	0.924528	0.697487	0.634837	0.170858	0.57486	0.549184	0.710744	0.653875	0.743363	0.896414
PD98059	1250	1.41451	0.797222	0.830189	0.99004	0.724813	0.724138	0.976316	1.25054	0.872629	1.06152	0.785863	1.33853	0.724842	0.425856	1.32075	0.991543	1.00878	1.06572	0.886878	0.902778	0.88024	1.18511	1.76611	0.977129	1.28352	0.921053	0.950617	0.992995	0.295775	0.811806	1.63254	0.653497	0.30086	0.921053	0.614145	0.82963	0.812644	0.834197	0.894049	1.10592	0.752399	0.27182	0.672626	0.616089	0.811983	0.683918	1.02212	0.996016
PI-103	10000	0.320068	0.427666	0.934509	0.635135	0.169697	0.57377	0.766206	0.470492	1.26538	0.487395	0.72885	0.217729	0.109782	1.75829	-0.08	0.291979	0.244358	0.244024	0.989899	0.154499	0.0935915	0.510989	0.391239	0.39404	0.168269	0.24055	0.687064	0.812459	0.247642	0.0285948	0.437939	0.609188	0.575071	0.264865	-0.195531	0.56804	0.0750627	0.41866	0.311741	0.15808	0.861592	0.705521	1.04275	0.168407	0.379207	0.218606	0.9601	0.137031
PI-103	1000	0.616427	0.427666	0.819899	0.5	0.440152	0.57377	0.632306	0.447541	1.13077	0.411765	0.789588	0.272162	0.173046	1.36019	0.24	0.381818	0.290701	0.571713	0.801347	0.39219	0.264638	0.456044	0.518127	0.556291	0.23137	0.216495	0.756057	0.472787	0.676887	0.417484	0.592506	0.421223	0.882436	-0.00945946	0.0260708	0.47191	0.229979	0.688696	0.264507	0.686662	0.975779	0.641104	0.158679	0.349523	0.99015	1.0309	0.968828	0.243611
PI-103	100	0.515665	0.661671	1.08438	0.891892	0.593939	0.57377	0.885228	0.619672	1.29231	0.537815	1.12364	0.544323	0.684742	1.69194	0.92	0.554011	0.707794	0.766932	0.895623	0.629881	0.626095	1.15934	0.803625	0.840232	0.68149	0.601375	0.856674	0.991475	1.00708	0.623366	0.688525	0.636364	0.941926	0.245946	0.808194	0.716604	0.557381	0.895933	0.491228	0.765702	0.958478	0.647239	0.61658	0.807081	1.06293	0.964168	1.07357	0.414899
PI-103	10	1.11431	0.91585	1.07557	1.10135	0.800758	0.860656	0.855473	0.745902	1.30128	0.806723	1.15401	0.947123	0.878256	2.0237	1.24	0.853476	1.01745	0.99004	1.03704	1.39049	0.82296	2.20879	0.898792	0.961921	0.86238	0.914089	0.954415	1.10164	0.924528	0.840686	0.742389	0.808476	1.13031	0.766216	0.938547	1.30212	0.747433	1.04456	0.736842	1.0127	1.00346	0.634969	0.956606	0.981843	1.06484	0.860618	1.13466	0.943991
PKC-412	10000	0.208627	0.644788	1.43612	0.591769	0.321839	0.532995	0.421405	0.459245	0.329184	1.24684	0.872054	0.101777	0.181461	0	0.287671	0.408451	0.333728	0.312241	0.424242	0.466667	0.484981	0.231831	0.713816	0.420118	0.288901	-0.0265152	0.791045	0.545717	0.891441	0.476043	0.767016	0.747005	0.62775	0.723902	0.595054	0.795062	0.218401	0.206101	0.310873	0.57084	0.34068	0.402165	0.156643	0.123335	0.357631	0.284847	0.911243	0.411765
PKC-412	2000	0.301961	0.907336	1.12654	0.794216	0.592476	0.177665	0.639911	0.389662	0.290456	2.62132	0.494949	0.0904685	0.454569	0.7	0.799087	0.415493	0.478827	0.660788	0.954545	0.551515	1.2718	0.0901564	0.529605	0.680473	0.780814	0.0530303	0.726368	0.48845	0.77453	0.351623	0.790576	0.543739	0.473773	2.1239	0.508501	0.665432	0.318834	0.335225	0.353752	0.605437	0.960973	0.929642	0.24965	0.243661	0.425968	0.522927	0.936095	0.312636
PKC-412	400	0.592941	1.03089	1.05774	0.918799	0.885057	0.248731	0.788183	0.681909	0.726141	1.49229	0.612795	0.294023	0.912804	0.4	0.767123	0.408451	0.771099	0.994813	0.883838	0.837879	0.780039	0.347746	0.978618	0.668639	1.21807	0.530303	0.78607	0.650144	0.496868	0.589645	0.756545	0.876588	0.580372	0.956098	0.735703	0.725926	0.797085	0.767293	0.846861	0.807249	1.29201	1.24438	1.15524	0.995703	1.07062	0.905557	1.05207	0.987473
PKC-412	80	0.856471	1.03475	1.12654	1.3782	1.06792	0.390863	0.998885	1.47515	0.793914	0.755961	1.22559	0.712439	1.03011	0.933333	0.799087	0.457746	1.06959	1.0166	0.848485	0.784848	0.854651	0.785649	1.22039	0.621302	1.47183	0.715909	0.860697	0.811838	0.716075	0.77898	0.931937	0.848639	0.722504	1.03122	0.973725	0.812346	0.950125	1.1199	1.05054	0.789951	1.1506	1.03747	1.04266	1.104	1.07517	0.986335	1.12663	1.24292
PP2	10000	0.455686	0.312741	0.842752	1.22247	0.665622	0.213198	0.725753	1.04374	0.987552	0.363254	0.96633	0.667205	0.601205	1.56667	1.50228	0.211268	0.957655	1.25622	0.247475	0.827273	0.440891	0.669733	0.299342	0.473373	0.648076	0.609848	0.532338	1.48219	0.438413	0.335394	0.746073	0.581851	0.461929	0.717073	0.173107	0.639506	0.282168	0.206101	0.41807	0.403624	0.858127	0.431307	0.200699	0.26171	0.414579	0.374127	0.737278	0.240196
PP2	5000	0.812549	0.505792	0.859951	0.98109	0.373041	0.35533	0.827202	1.28032	0.910097	0.863955	1.27273	0.836834	0.753339	1.83333	0.671233	0.323944	0.988747	1.27801	0.848485	1.17727	0.630814	0.817847	0.65625	0.609467	0.655884	0.583333	0.616915	0.666987	0.569937	0.481453	0.832461	0.51833	0.686971	0.921951	0.735703	0.74321	0.58506	0.389855	0.600306	0.686161	1.12489	0.402165	0.318182	0.4422	0.649203	0.803523	1.0355	0.415577
PP2	2500	0.85098	0.803089	1.28993	1.41713	0.753396	0.532995	0.928651	1.23857	1.35546	1.05049	1.57912	1.39095	0.832155	1.36667	1.63014	0.457746	1.02399	1.11826	1.13131	1.18788	0.715601	0.99172	0.759868	0.573964	0.948689	0.742424	0.691542	0.71078	0.643006	0.578825	0.950262	0.752087	0.663283	0.915122	0.768161	0.734568	0.824186	0.6779	0.996937	0.836079	1.08632	0.486678	0.626573	0.953588	0.71754	1.03097	0.911243	0.842593
PP2	1250	1.08706	0.976834	1.33292	1.4327	1.17032	0.923858	0.975474	1.14115	1.5491	1.13885	1.57912	1.04039	0.956795	1.46667	1.75799	0.732394	1.00118	1.18361	1.48485	1.06061	1.0344	1.23643	0.967105	0.786982	1.17903	1.06061	0.945274	0.798364	0.964509	1.0711	1.06806	1.19673	1.30288	1.14049	1.0711	0.916049	0.840128	0.876552	1.06126	0.89374	1.02525	0.527477	0.651049	1.30254	0.829157	1.24992	1.11006	0.831155
PTK787	10000	0.88315	0.496254	0.458438	0.75	0.604545	0.344262	0.795962	0.814754	1.22051	0.613445	0.62256	0.674961	0.599149	0.265403	0.56	0.464171	0.979537	0.906375	0.707071	0.475382	0.784232	1.07692	0.570997	0.49255	0.988582	0.38488	0.678439	0.463607	0.462264	0.554739	0.641686	0.813005	0.674221	0.605405	0.443203	0.742821	0.535022	0.799641	0.453441	0.765702	1.18339	1	0.716321	0.549705	0.541997	0.614398	0.680798	0.224579
PTK787	1000	1.33362	0.823055	0.802267	1.2027	0.742424	0.459016	0.900106	0.918033	0.90641	0.94958	0.668113	1.03421	0.872674	0.829384	1.64	0.741176	1.01745	1.12948	1.2963	0.879457	0.89396	0.989011	0.835347	0.672185	1.14423	0.817869	0.882546	0.817049	0.726415	0.834967	0.775176	0.765448	0.773371	1.12568	0.769088	0.769039	0.761807	0.971292	0.784076	0.681722	0.972318	1.19018	0.952073	0.950068	0.850342	0.830703	0.925187	0.902121
PTK787	100	1.36918	0.980403	0.881612	1.5	1.02348	1.09016	1.07864	1.06721	1.30128	1.17647	0.986985	1.06687	0.963849	0.530806	1.16	0.883422	0.979537	1.03884	1.10774	0.903226	0.94237	1.51648	0.719033	0.846026	1.05168	0.769759	0.848049	1.09246	0.908019	0.829248	0.793911	0.935296	0.842776	1.0973	0.886406	0.821473	0.795346	1.1555	0.869096	1.19054	1.08651	1.01534	0.956606	1.01044	1.01888	0.94806	1.29177	1.06199
PTK787	10	1.18544	1.02075	1.26071	1.55405	0.816667	0.97541	0.937301	0.929508	0.978205	1.03361	0.926247	0.990669	0.958267	1.06161	1.44	1.07807	1.04063	1.0249	0.895623	0.91511	1.2296	2.69231	1.14199	0.898179	0.992788	0.938144	0.917043	1.28984	1.27123	0.972222	0.784543	1.05532	1.16997	1.40946	0.964618	1.40699	0.883185	1.01316	0.869096	0.923783	1	1.06442	1.03821	0.937358	1.01696	1.00559	1.1783	1.08102
SB-202190	10000	0.725389	0.447222	1.04717	0.536853	0.946828	2.01149	0.967105	0.716776	0.711382	0.79113	0.800416	0.743626	1.04983	0.692015	0.572327	0.562368	1.14441	2.46878	0.696833	1.18056	0.981537	0.826955	-1.37937	0.772871	0.850575	0.529605	0.635802	0.441331	0.723005	1.54583	0.775123	1.4	1.12321	0.754386	0.275739	1.12346	0.0595402	0.535982	0.822932	0.666068	1.85413	1.26072	0.758659	0.518519	0.710744	1.2565	0.80531	0.370518
SB-202190	1000	0.955095	0.482222	0.820755	0.501992	0.940299	1.04598	0.893421	1.12854	0.806233	0.72103	0.931393	0.822946	1.0107	0.13308	0.616352	0.843552	0.991826	1.57174	0.696833	1.08333	0.91517	0.885191	-1.12155	0.844637	0.796935	0.851974	0.617284	0.576182	0.953052	0.884722	0.706105	1.23112	0.641834	0.684211	0.313339	0.777778	0.230115	0.364709	1.07692	0.936266	1.12524	1.15717	0.563128	0.763839	0.555785	0.952537	0.890487	0.474104
SB-202190	100	0.888601	0.684444	0.820755	0.704183	0.914179	1.04598	1.04079	0.976035	0.720867	0.93133	0.829522	0.882436	0.876276	0.452471	0.792453	0.895349	0.962156	0.820372	0.823529	0.888889	0.86976	0.923045	1.10866	0.87776	0.83908	0.621711	0.67284	0.486281	0.723005	0.855556	0.799014	0.961888	0.481375	0.815789	0.307073	0.78642	0.513333	0.479562	1.09724	0.911131	0.990883	0.390902	0.922905	0.710872	0.743802	0.768745	0.960177	0.545817
SB-202190	10	0.955095	0.937222	0.933962	0.669323	0.920709	1.12644	0.884211	0.884532	0.692412	0.951359	0.960499	0.991501	0.935829	0.638783	0.924528	0.917548	0.991826	1.01972	0.918552	1.04167	0.883733	0.949251	1.50829	0.883281	0.8659	0.782895	0.759259	0.731465	0.295775	0.665972	0.891923	0.868881	0.421203	0.780702	0.457475	0.967901	0.862529	0.918826	1.14804	1.04309	1.06142	0.566938	0.793855	0.816806	0.921488	0.913658	0.998894	0.896414
SB-203580	10000	1.04577	0.563889	1.32075	1.06673	0.816231	1.36782	1.15132	1.37255	1.20461	1.00143	1.30977	1.30878	0.983471	0.39924	0.968553	0.843552	1.08931	2.96714	1.33032	1.23611	1.07236	0.946339	1.22468	1.1041	1.01916	0.875	0.851852	0.943958	1.34742	1.09375	0.894577	1.37797	0.862464	1.2807	0.300806	0.950617	0.15931	0.390904	0.853411	0.929982	1.65259	1.22448	0.543575	0.853047	0.520661	1.1434	1.09181	0.438247
SB-203580	1000	1.02159	0.56	1.38679	0.927291	0.992537	1.52874	1.15132	1.3268	1.16667	0.851216	1.12058	1.11048	0.93753	1.73004	1.2327	0.87315	1.00666	1.3034	0.950226	1.08333	1.0025	1.18802	1.45672	1.03233	0.980843	1.15132	0.975309	0.825452	1.23239	0.986806	0.881305	1.17238	1.26361	1.19298	0.407341	1.08889	0.402299	0.284111	1.02612	1.05566	1.17226	0.639423	0.418436	0.805655	0.659091	0.920727	1.07633	0.458167
SB-203580	100	1.25734	0.781667	1.30189	1.13645	0.933769	1.36782	0.994737	1.02179	1.25203	1.1216	0.829522	1.1898	0.927321	0.638783	1.14465	0.939746	0.993945	0.843373	1.26697	1.34722	0.859281	1.05699	0.966851	0.839117	0.915709	0.990132	0.95679	0.800934	0.870892	0.4375	0.918468	1.05979	0.882521	0.903509	0.376007	0.924691	0.767586	0.793898	0.894049	1.08707	0.980806	0.411612	0.625698	0.889287	0.853306	0.941934	1.09181	0.589641
SB-203580	10	1.37824	1.04222	1.30189	1.13645	1.09049	2.41379	1.16053	1.09804	1.1477	1.27182	1.00416	1.10057	0.929023	0.798479	1.45283	1.08774	1.00878	1.05805	1.39367	0.972222	1.2505	1.09193	0.438306	1.10962	1.0728	1.19737	1.10494	0.988908	1.98826	1.09861	1.10163	1.18706	2.12607	4.35965	0.639212	1.37407	0.862529	1.05584	0.924528	0.898564	1.09165	0.934541	0.899441	1.16249	1.0062	1.08508	1.38606	1.29084
SB-431542	10000	1.17358	0.855331	0.837531	1.15541	1.0447	0.745902	0.855473	1.00984	0.852564	0.915966	1.00217	1.11042	0.999203	1.79147	0.88	1.10053	1.3861	1.52689	0.942761	1.23599	0.997234	1.26374	0.771903	0.909768	1.42188	0.793814	0.802053	1.18885	-1.73349	0.720588	0.747073	0.858298	0.842776	1.0027	0.664804	0.900125	0.578143	1.03618	0.887989	0.745942	1.24567	1.03988	0.933938	0.762596	0.911628	1.13445	0.9601	0.719413
SB-431542	1000	1.20914	0.911816	1.05793	0.621622	0.64697	0.803279	1.02657	1.07869	0.861538	0.957983	0.895879	1.02333	0.997342	2.65403	1.4	1.07807	1.1607	1.37351	1.03704	0.950764	0.939142	1.06593	0.793051	0.869205	1.11058	0.649485	0.917043	1.04656	-2.0967	0.76634	0.742389	0.78583	0.932011	1.07838	1.14711	0.769039	0.729865	1.04665	0.963563	1.1362	1.31142	0.97546	1.17876	1.00409	0.995896	0.918146	1.01247	1.22186
SB-431542	100	1.19729	0.984438	1.27834	0.804054	0.965152	1.2623	1.12327	1.23934	1.22949	0.991597	1.13883	1.12131	1.01967	1.52607	1	1.04064	1.11857	1.19223	1.17845	1.04584	1.01982	1.67033	0.898792	1.11838	0.992788	1.05842	0.963039	1.14295	-1.43632	0.875	0.770492	0.781301	0.981586	1.05	1.2514	0.978777	0.854438	1.10317	1.00135	1.13126	1.10727	1.00307	1.15609	1.10259	1.00739	0.904339	1.14339	1.05438
SB-431542	10	1.01948	1.01671	1.19018	0.790541	0.837879	1.03279	1.03401	0.814754	1.28333	0.966387	0.956616	0.990669	0.975013	1.19431	0.84	0.958289	0.981643	1.00398	0.872054	1.02207	0.900415	2.25824	1.02568	0.909768	0.858173	0.67354	0.905544	1.05574	-2.03066	0.943627	0.740047	0.742802	1.06091	0.993243	1.30354	1.3196	0.780972	1.01944	0.944669	1.07692	1.0173	0.97546	1.00194	0.921471	0.995896	0.876726	1.11721	1.45405
Sorafenib	10000	1.49365	0.613256	0.90806	1.07432	0.530303	0.918033	0.937301	0.665574	1.10385	0.630252	0.850325	0.609642	0.375864	0.895735	0.52	0.64385	0.905808	1.12251	0.754209	1.23599	0.435685	0.445055	0.401813	0.556291	1.11058	0.120275	0.681314	0.0780328	0.610849	0.360294	0.606557	0.321579	0.763456	0	0.273743	0.891386	0.110198	0.23445	0.547908	0.602682	1.11419	0.328221	0.126943	0.368588	0.338988	0.591387	0.724439	0.110386
Sorafenib	1000	1.26842	0.923919	0.872796	1.47973	1.08712	1.54918	1.19766	0.906557	1.25641	1.05882	1.19957	0.783826	1.14992	1.02844	1.32	0.64385	0.97743	2.2241	1.15488	0.950764	0.758414	0.516484	0.951662	0.898179	1.14844	0.697595	0.89117	0.913443	1.10613	1.25817	1.06557	1.30217	0.991501	0.728378	0.899441	1.04869	0.832078	0.895933	1.1525	0.647142	1.53633	1.15031	0.766192	0.784839	0.846512	1.04011	1.22195	0.365416
Sorafenib	100	1.16765	0.984438	0.943325	0.905405	1.09773	1.37705	1.0712	0.906557	1.20256	0.991597	1.01735	0.794712	1.0848	1.65877	0.6	0.681283	0.966897	1.34562	0.73064	1.02207	0.77455	0.60989	0.0951662	0.915563	0.975962	0.408935	0.940041	1.0741	1.18868	1.26961	0.899297	1.32934	0.932011	0.785135	0.964618	1.01373	0.838467	1.03828	1.0108	0.642202	1.32526	1.2546	1.05635	0.956423	1.08208	1.09073	1.14339	0.985862
Sorafenib	10	1.221	1.0853	1.18136	1.21622	1.12424	1.72131	1.11583	0.929508	1.05	1.10924	1.15401	0.849145	1.0327	1.42654	2.12	0.988235	1.03641	1.09462	1.22559	0.986418	1.16828	1.76374	1.31118	1.05464	1.10216	1.4433	0.980287	1.22557	1.81604	1.10376	0.936768	1.37237	1.33853	1.30541	1.17318	1.50312	0.884782	1.20574	1.06748	0.622442	1.14879	1.2362	1.21049	0.946891	1.17975	1.12985	1.11721	1.15715
SRC	10000	0.702745	0.660232	1.15233	1.31591	1.05329	1.10152	0.991081	0.779324	1.21024	0.608696	0.848485	0.531502	0.874313	1.83333	0.671233	0.612676	0.974237	2.17116	0.707071	0.784848	0.352713	0.573137	0.518092	0.402367	1.07362	0.609848	0.547264	0.629933	0.569937	0.697836	0.795812	0.475136	0.556684	0.826341	0.681607	0.78642	0.521294	0.4569	0.503828	0.478583	0.960973	0.926728	0.518881	0.767082	0.906606	1.1819	0.919527	0.869281
SRC	5000	1.0651	0.830116	1.09214	1.63515	0.760711	0.959391	0.998885	1.93439	1.19087	0.736325	0.96633	0.610662	1.07227	1.06667	0.703196	0.774648	1.14836	1.69191	0.883838	0.965152	0.654554	0.48942	0.978618	0.609467	1.37033	0.662879	0.621891	0.589509	0.759916	0.735703	0.921466	0.431942	0.686971	0.990244	1.017	0.769136	0.741289	0.682866	0.686064	0.415157	1.21488	0.906328	0.783217	0.827245	1.02961	1.17765	1.04379	1.05229
SRC	2500	1.26275	1.14672	1.05774	1.61958	0.760711	0.746193	1.05351	1.36382	1.11342	0.746143	1.81481	0.983845	0.938466	0.933333	0.926941	0.71831	1.05301	1.38693	1.13131	1.17727	0.702035	0.624655	0.944079	0.64497	1.3469	0.530303	0.656716	0.737729	0.730689	0.762751	0.994764	0.807985	0.675127	0.969756	0.789799	0.74321	0.723753	0.737496	0.814701	0.663097	1.27273	0.883014	0.881119	0.821229	1.09339	1.09475	1.06036	1.13235
SRC	1250	1.0102	1.10425	1.30713	1.25362	0.936259	0.923858	1.0301	1.11332	1.26833	0.863955	1.55556	0.972536	0.954962	1.53333	1.40639	1.0493	1.08824	1.27075	1.37879	1.11364	0.888566	0.792088	0.990132	0.715976	1.17122	0.875	0.835821	0.818576	0.803758	1.07651	0.986911	1.06715	1.3621	1.1678	1.12519	0.941975	0.637668	0.802057	0.900459	0.530478	1.03168	0.652789	0.807692	0.947572	1.10251	1.15427	1.1929	0.960784
Staurosporine	10000	0.0439216	0.015444	0.0773956	0.00778643	0.153605	0.319797	0.0312152	0.166998	0.222683	0.0490884	0.0707071	-0.0452342	0.0348259	-0.266667	-0.351598	0.0211268	-0.00621854	-0.0798755	0	0.159091	-0.0101744	-0.0772769	-0.138158	0.248521	0.0507529	-0.583333	0.313433	0.0572666	0.321503	0.12442	0.149215	0.172777	0.367174	0.19122	0.216383	0.630864	0.00159417	0.0173821	-0.0107198	0.288303	0.077135	0.0582848	0.0636364	0.090245	0.0888383	0.0170058	0.0497041	0.163943
Staurosporine	1000	0.054902	0.0810811	0.0601966	0.00778643	0.197492	0.106599	0.101449	0.0417495	0.0968188	0.088359	0.023569	0	0.0348259	0.366667	0.0319635	0.0774648	0.00207285	0.0798755	0.353535	0.254545	-0.0169574	-0.00643974	0.149671	0.254438	0.0663692	-0.371212	0.323383	-0.00336862	0.23382	0.0324575	0.117801	0.0686025	0.0236887	-0.0819512	-0.162287	0.475309	0.00159417	0.0347641	0.042879	0.559308	0.109275	0.0670275	0.0783217	0.126343	0.095672	0.0255087	0.0745562	0.0571895
Staurosporine	100	0.724706	0.675676	1.10074	0.443826	0.285266	0.071066	0.45262	0.487078	0.193638	0.765778	0.447811	0.15832	0.177795	0.266667	0.607306	0.971831	0.335801	0.646266	0.424242	0.381818	1.14293	-0.00643974	0.690789	0.372781	0.144451	-0.556818	0.99005	1.17902	0.482255	0.0216383	1.02618	0.076225	0.0592217	2.4039	0.238022	0.380247	0.648827	0.312877	0.278714	1.06096	0.411387	0.477935	1.12098	0.243661	0.289294	0.282721	0.588166	1.96732
Staurosporine	10	0.450196	0.857143	1.16953	0.537264	0.84117	0.106599	0.749164	0.737575	0.280775	3.35764	0.636364	1.78675	0.590207	0.766667	0.958904	0.922535	0.617708	0.740664	0.883838	0.689394	1.81105	0.0579577	1.0477	0.35503	0.472393	0.159091	1.11443	3.29788	2.26514	0.26507	1.03927	0.500544	0.236887	3.64	0.292117	0.466667	0.677522	0.72508	0.45023	1.33196	1.1056	1.23855	2.35455	0.761066	0.929385	0.979957	0.836686	4.26253
STO609	10000	1.32988	0.991667	1.07547	0.941235	0.626866	0.16092	0.875	0.747277	0.607046	1.15165	0.844075	0.545326	0.5649	0.0532319	0.264151	0.443975	1.01938	0.935378	0.506787	0.597222	0.576347	0.829867	0.489871	0.629338	0.762452	0.253289	0.512346	0.899008	-0.0164319	0.515278	0.934395	0.540909	0.361032	0.807018	0.150403	0.535802	0.542299	0.677029	0.497823	0.760323	0.668426	0.784393	1.00503	1.05376	0.991736	0.926029	0.658186	0.501992
STO609	2000	1.79534	1.27944	1.12264	1.51295	0.959888	0.643678	0.875	1.00654	1.271	1.29185	1.09148	0.971671	0.908605	0.585551	1.67296	0.747357	1.02361	1.13472	0.918552	1.22222	1.02345	1.00749	0.86372	0.701104	0.992337	0.805921	0.833333	1.00117	0.591549	0.709722	1.01138	0.841958	0.842407	1.15789	0.463742	0.630864	0.85931	0.872481	0.772134	1.17504	0.799424	0.93713	0.778212	1.36599	1.34711	0.956072	1.00664	0.836653
STO609	400	0.997409	1.23278	1.15094	1.86853	0.979478	0.965517	1.01316	1.03704	1.39431	1.24177	0.960499	0.961756	0.963053	0.612167	0.880503	0.725159	1.0109	1.02738	0.855204	1.61111	0.957086	1.03369	1.14733	0.65142	1.04598	0.713816	0.91358	0.911267	0.42723	0.301389	0.90785	0.971678	0.722063	1.22807	0.476276	0.65679	0.79977	0.94905	0.88389	1.08079	0.933781	0.83358	0.82514	1.45241	1.30785	0.97021	1.18473	1.06773
STO609	10	1.38428	1.20167	1.64151	1.45717	1.16884	1.68966	1.03158	1.18954	1.29946	1.35193	0.945946	1.15014	0.922217	0.984791	2.02516	1.07294	1.05964	1.08105	1.48869	1.33333	1.13174	1.07737	1.52118	0.905363	1	1.03618	1.03704	0.972563	0.920188	0.845833	1.07243	1.21154	1.90544	3.83333	0.689346	1.01111	0.78046	1.0639	0.670537	1.06822	1.00768	0.898299	0.934637	1.20709	1.24587	1.08155	1.34735	1.09562
SU-14813	10000	0.385267	0.576945	0.899244	0.351351	0.530303	1.54918	0.624867	0.57377	0.664103	0.537815	0.668113	0.413686	0.13025	0.829384	0.08	0.321925	0.602468	0.299801	0.659933	0.475382	0.322729	0.28022	0.528701	0.573675	0.542668	0.19244	0.761807	-0.110164	0.808962	0.937908	0.487119	0.412164	1.32861	0.113514	0.221601	0.94382	0.0495095	0.131878	0.481781	0.251941	0.204152	0.208589	0.140544	0.203359	0.275787	0.301446	0.76808	0.129418
SU-14813	1000	0.717189	1.00865	0.802267	0.337838	0.684091	1.2623	1.06376	0.527869	0.861538	0.680672	0.774403	0.576983	0.550771	2.0237	0.36	0.441711	0.884743	0.878486	0.73064	0.641766	0.661595	0.296703	0.549849	0.793874	0.90024	0.745704	0.770431	0.165246	0.511792	0.812092	0.622951	0.600129	0.961756	0.472973	0.534451	0.873908	0.520648	0.747309	0.831309	0.330981	0.726644	0.41411	0.208549	0.587835	0.790971	0.685733	0.776808	0.197934
SU-14813	100	0.788315	0.9683	0.916877	0.391892	0.493182	1.09016	1.12327	0.654098	0.646154	0.823529	0.956616	0.664075	0.909888	1.32701	0.48	0.568984	0.92898	0.948207	0.919192	1.28353	0.684186	0.395604	0.729607	0.77649	0.719351	1.05842	0.810678	0.344262	0.561321	0.732026	0.716628	0.801682	1.10057	0.548649	1.00372	0.786517	0.669176	0.889653	0.944669	0.385321	0.896194	0.776074	0.507772	0.768951	0.903967	0.902038	0.951372	0.532898
SU-14813	10	0.895004	1.01268	1.01385	0.513514	0.509091	1.03279	1.02657	0.757377	0.84359	0.857143	1.03254	0.827372	0.930356	1.16114	0.64	0.786096	0.990069	1.00398	0.942761	1.04584	0.790687	0.769231	1.01511	0.886589	0.853966	0.890034	0.879671	0.500328	0.726415	0.903595	0.71897	0.731478	1.00142	0.766216	0.860335	0.900125	0.705909	0.981758	0.906883	0.627382	0.972318	0.929448	1.11982	0.892873	0.894391	1.07002	0.986284	0.825992
Sunitinib	1000	0.497883	0.609222	0.775819	0.290541	0.551515	0.918033	0.855473	0.516393	0.951282	0.588235	0.607375	0.37014	0.34051	0.530806	-0.08	0.321925	0.762564	0.508964	0.494949	0.52292	0.561549	0.340659	0.507553	0.544702	0.176683	0.312715	0.83655	0.142295	0.528302	0.903595	0.559719	0.443869	1.08074	0.454054	0.234637	0.856429	0.590919	0.66567	0.812416	0.410021	0.577855	0.346626	0.117876	0.406718	0.708618	0.667324	0.733167	0.140837
Sunitinib	100	0.84166	0.992507	0.722922	0.331081	0.641667	0.918033	0.848034	0.527869	0.610256	0.882353	0.789588	0.587869	0.779638	1.36019	0.36	0.471658	0.92898	0.948207	0.565657	0.796265	0.642231	0.296703	0.507553	0.620033	0.816106	0.745704	0.776181	0.495738	0.511792	0.743464	0.644028	0.679392	0.922096	0.567568	0.886406	0.812734	0.741045	0.944079	0.850202	0.400141	0.820069	0.730061	0.362694	0.759419	0.919289	0.777778	0.872818	0.315933
Sunitinib	10	0.823878	0.919885	0.811083	0.385135	0.477273	0.401639	0.914984	0.734426	0.646154	0.890756	0.789588	0.751166	0.904306	1.06161	0.4	0.651337	0.966897	1.03884	0.754209	0.831919	0.70355	0.543956	0.793051	0.654801	0.795072	0.793814	0.859548	0.688525	0.627358	0.714869	0.655738	0.668069	0.941926	0.785135	1.18622	0.7603	0.729865	0.889653	0.944669	0.498941	0.930796	0.874233	0.875	0.867453	0.932695	0.897436	0.881546	0.677542
Sunitinib	1	0.942422	0.931988	0.802267	0.743243	0.466667	0.688525	0.974495	0.82623	0.744872	0.890756	0.895879	0.968896	0.902446	1.62559	0.64	0.77861	0.998495	1.05279	0.919192	0.760611	0.839096	0.840659	0.856495	0.840232	0.959135	0.62543	0.882546	0.991475	0.57783	0.852124	0.629977	0.652216	0.882436	0.898649	1.16015	0.830212	0.755419	0.981758	0.897436	0.765702	0.944637	1	0.943005	0.880163	0.970999	0.90664	0.933915	0.943991
SYK	10000	0.538039	1.10039	1.13514	0.638487	0.61442	2.38071	0.858417	0.528827	0.919779	0.71669	1.10774	0.723748	0.44907	1.8	1.75799	0.676056	0.756589	1.71369	1.59091	0.742424	0.556202	0.412144	0.898026	0.87574	1.11266	0.503788	0.800995	0.448027	0.832985	0.687017	0.717277	0.828312	1.0423	0.880976	0.757342	1.12346	0.376224	0.595956	1.41501	0.478583	0.716713	0.410908	0.763636	0.466266	0.594533	0.835408	1.10178	0.434641
SYK	1000	0.735686	0.938224	0.87715	0.568409	0.621735	1.27919	0.944259	0.709742	0.832642	0.746143	1.01347	0.825525	0.656193	0.5	0.958904	0.774648	0.980456	1.38693	1.34343	1.24091	0.763081	0.264029	0.725329	0.798817	1.08533	0.768939	0.766169	0.687199	0.643006	1.06569	0.748691	0.975681	1.0423	0.833171	0.714065	0.777778	0.363471	0.476765	0.87902	0.518946	0.793848	0.367194	0.357343	0.472282	0.660592	0.654722	1.0355	0.545207
SYK	100	0.84549	0.876448	0.894349	0.630701	0.607106	0.888325	0.881828	0.723658	0.881051	0.706872	0.848485	0.848142	0.811993	0.733333	0.926941	0.802817	0.951436	1.11826	1.20202	1.15606	0.813953	0.766329	0.898026	0.87574	1.09314	0.742424	0.850746	0.720885	0.745303	0.870943	0.874346	0.924864	0.663283	0.853659	0.789799	0.78642	0.701435	0.77226	0.964778	0.593904	0.973829	0.410908	0.797902	0.613666	0.826879	0.818403	1.09349	0.754902
SYK	10	0.801569	0.942085	1.01474	0.638487	0.782654	0.746193	1.0379	0.848907	0.910097	0.84432	0.824916	0.995153	0.9348	1.26667	1.05479	0.901408	0.980456	0.951245	1.02525	1.02879	0.837694	0.74701	0.990132	0.763314	1.03458	0.689394	0.865672	0.73436	0.759916	0.870943	0.910995	0.91216	0.971235	0.853659	0.789799	0.967901	0.942154	0.975878	1.01838	0.934102	1.02847	0.8801	0.905594	0.776107	0.883827	0.89918	1.0355	0.96841
VX-680	10000	0.918826	0.287778	0.801887	0.829681	0.45056	0	0.773684	0.610022	0.910569	0.310443	0.713098	0.416431	0.47472	1.03802	1.10063	0.332981	0.493794	0.429354	0.633484	0.402778	0.251497	0.704659	1.05709	0.347792	0.528736	0.851974	0.641975	0.788675	0.295775	0.777778	0.958286	0.516434	0.681948	0.885965	0.513876	0.440741	0.18023	0.217617	0.233672	0.917415	0.322457	0.095784	0.12514	0.139387	0.316116	0.478919	0.82854	0.10757
VX-680	1000	1.15458	0.7	0.886792	0.871514	0.685634	0.402299	0.773684	0.899782	1.19512	0.690987	1.23701	0.654391	0.915411	1.03802	1.76101	0.621564	0.693006	1.21906	0.918552	1.02778	0.61477	0.978369	1.59853	0.772871	0.927203	1.03618	0.87037	1.01343	0.328638	0.661111	0.942359	0.575175	0.74212	0.903509	0.971352	0.492593	0.56	0.717329	0.86357	0.640934	1.01775	0.362426	0.688268	0.705297	0.900826	0.850038	1.03761	0.864542
VX-680	100	0.852332	0.929444	0.981132	0.948207	0.933769	0.643678	1.02237	1.12854	1.04336	0.901288	1.41164	1.01133	0.942635	0.825095	1.49686	0.70296	0.798971	1.26506	0.855204	1.23611	0.709082	1.15017	1.4954	0.800473	0.984674	0.621711	1.00617	0.960304	0.492958	0.281944	1.11225	0.773427	1.40401	0.973684	0.689346	0.553086	0.611494	0.715314	0.843251	0.722621	0.960653	0.753328	0.918994	0.825169	0.93595	0.957839	1.19248	1.14741
VX-680	10	1.14249	1.04611	1.17925	0.836653	1.62593	1.04598	1.15132	0.976035	1.23306	1.18169	1.10603	1.10057	1.08216	1.03802	2.28931	0.895349	1.03421	1.21139	1.14027	1.16667	1.16317	1.03952	1.46961	0.866719	0.927203	0.828947	0.895062	0.886748	0.903756	0.802083	1.05119	1.07692	3.4298	2.84211	0.664279	0.846914	0.798161	0.98129	0.965167	1.01795	1.09837	0.991494	1.13799	0.847471	1.02066	1.10098	1.5719	1.21116
VX-745	10000	1.27547	0.392778	1.03774	0.864542	0.639925	0.885057	0.884211	0.56427	0.939024	0.911302	0.640333	0.842776	0.571706	0.692015	-0.0440252	0.480973	0.97911	0.667032	0.760181	1.26389	0.600798	0.879368	0.425414	0.690063	1.04215	0.391447	0.388889	0.572096	0.328638	0.661111	0.729996	0.746503	0.340974	0.798246	0.238138	0.604938	-0.0016092	0.0947035	0.518142	0.546679	0.597889	0.269231	0.183799	0.532457	0.32438	0.501893	0.704646	0.314741
VX-745	1000	1.63212	0.451111	0.962264	0.780876	0.809701	1.2069	0.957895	1.09804	0.853659	0.881259	0.669439	0.981586	0.684006	0.106464	0.792453	0.747357	1.02361	0.682366	0.918552	1.59722	0.901198	1.09775	0.58011	0.712145	0.954023	0.391447	0.734568	0.678342	0.723005	0.685417	0.889268	0.905594	0.381089	0.736842	0.294539	0.734568	0.265517	0.278066	0.833091	0.760323	0.587812	0.266642	0.242458	0.507368	0.502066	0.653875	0.952434	0.621514
VX-745	100	1.04577	0.684444	1.04717	1.14343	0.85541	1.44828	0.957895	1.08279	1.43225	1.07153	0.713098	1.1204	0.855858	0.372624	0.968553	0.887949	1.00878	0.843373	1.04525	1.52778	1.2505	1.14725	0.760589	0.723186	1.08812	0.644737	0.895062	0.81728	0.542254	0.2625	0.939704	1.06469	0.982808	1.07895	0.407341	0.725926	0.522989	0.830167	0.934688	0.973968	0.890115	0.341716	0.477095	0.65233	0.764463	0.802323	1.12279	0.657371
VX-745	10	1.4266	0.929444	1.34906	1.28287	0.86847	1.44828	1.13289	1.00654	1.11924	1.25179	0.698545	1.07082	0.940933	0.638783	1.10063	0.984144	1.00666	0.973713	1.1086	0.722222	1.29242	1.12687	0.876611	0.944006	0.923372	0.759868	0.932099	0.899008	1.10094	0.884722	0.992795	1.07937	2.30659	3.60526	0.576544	0.898765	0.756322	0.971215	0.822932	0.904847	1.00768	0.41679	0.793855	0.92274	0.977273	1.01086	1.36283	1.13546
ZD-6474	10000	0.219306	0.254179	0.767003	0.831081	0.57803	0.57377	0.163656	0.447541	0.762821	0.428571	0.652928	0.0870918	0.165603	0.597156	-0.08	0.149733	0.431839	0.36255	0.424242	0.415959	0.613186	0.648352	0.602719	0.828642	1.0012	0.601375	0.78768	0.445246	0.924528	0.623366	0.641686	0.50275	0.892351	-0.0851351	0.0651769	0.838951	0.400867	0.253289	0.387314	0.251941	0.0934256	0.527607	0.466969	0.270086	0.865663	0.299145	0.28803	0.0799347
ZD-6474	1000	0.972058	0.564841	0.767003	0.513514	0.768939	0.631148	0.795962	0.722951	0.619231	0.87395	0.72885	0.881804	0.88756	1.02844	0.4	0.80107	0.947939	1.13645	0.612795	0.891341	0.832642	0.758242	0.867069	0.817053	0.929688	0.721649	0.885421	0.977705	0.57783	0.543301	0.676815	0.455192	0.882436	1.04054	1.14711	0.751561	0.9295	0.908493	0.878543	0.400141	0.875433	0.610429	0.979275	0.765774	0.959508	1.30013	0.881546	0.559543
ZD-6474	100	1.20322	0.823055	0.767003	0.682432	0.535606	0.688525	0.803401	0.97541	0.628205	1.01681	0.819957	1.0451	0.956406	1.69194	1.2	0.860963	0.981643	1.10159	0.565657	0.724958	0.797142	0.840659	0.771903	0.869205	0.908654	0.408935	0.963039	1.05115	0.742925	0.772059	0.75644	0.53219	0.813031	0.964865	1.26443	0.882647	0.868811	0.962919	0.963563	0.706422	0.944637	0.978528	1.02008	0.842034	0.969083	0.975674	0.907731	0.943991
ZD-6474	10	1.01948	0.944092	0.775819	0.662162	0.652273	0.631148	0.862912	1.09016	1.10385	1.15126	1.10846	0.958009	1.11271	1.69194	0.48	0.905882	1.02377	1.08765	0.848485	0.65365	0.684186	0.857143	0.91994	0.834437	1.00541	0.601375	0.928542	1.00525	0.610849	0.783497	0.725995	0.520867	0.813031	0.917568	1.05587	0.803995	0.771389	0.971292	1.24696	1.09174	0.937716	1.03374	1.84974	0.924648	0.980575	0.911243	0.907731	0.924959
[truncated: 103 more columns]
