# Supplementary material for: Kinase Pathway Dependence in Primary Human Leukemias Determined by Rapid Inhibitor Screening
Source: Oxford University Press journal article supplement (doi:10.1158/0008-5472.can-12-1906), 2012-10-19
Supplement: 00085472can121906-sup-t6_xls_73k.xls [file 00085472can121906-sup-t6_xls_73k.xls]

## Sheet: Sheet1
Gene	ALL	CLL	AML	CML	CMML	MPN
AAK1	0.276707	0.385787	0.0983013	0.116373	0.218367	0
ABL1	0.332902	0.528618	0.744388	1	0.511207	0.242593
ABL2	0.236093	0.303863	0.528987	0.940883	0.216821	0
ACVR1	0.0483967	0.0200303	0.0554783	0.0347083	0.100058	0
ACVR1B	0.164267	0.0139839	0.115245	0	0	0.0485688
ACVR2A	0.0436801	0.0788124	0.0469282	0.0135802	0.0658426	0.083427
ACVR2B	0.0640818	0.0270273	0.0564806	0	0.00651841	0.0262654
ACVRL1	0.0179894	0.00544675	0.0511091	0	0.0602953	0
ADCK3	0.0312792	0.00974312	0.060518	0	0.0858801	0
ADCK4	0.042425	0.006451	0.0510819	0	0.0174368	0.0268948
AKT1	0.172194	0.319719	0.0450143	0	0.359923	0.281421
AKT2	0.152805	0.303965	0.0456444	0	0.364962	0.285361
AKT3	0.150205	0.284895	0.0468148	0	0.37432	0.292678
ALK	0.0849645	0.119932	0.0545297	0.00795346	0.193923	0.0811353
AMPK-alpha1	0.169898	0.136919	0.0879768	0.00626257	0	0
AMPK-alpha2	0.157399	0.128094	0.0504681	0.0288078	0.0342217	0
ANKK1	0.134649	0.0197168	0.0781031	0.0065382	0.061436	0
ARK5	0.267049	0.445569	0.0713594	0.0499647	0.125479	0
AURKA	0.271498	0.0931809	0.148863	0.117411	0.133139	0.131249
AURKB	0.295721	0.0877315	0.169672	0.0145543	0.170619	0
AURKC	0.259998	0.0889326	0.164472	0.0073272	0.160842	0
AXL	0.13662	0.0512361	0.0819691	0	0.121731	0
BIKE	0.22399	0.110232	0.0924051	0.00920597	0.12662	0
BLK	0.254806	0.518343	0.482795	0.238073	0	0
BMPR1A	0	0	0	0	0	0
BMPR2	0.0931554	0.0383717	0.0855965	0	0.0717025	0
BMX	0.138816	0.306013	0.251636	0.110135	0.00114072	0.166541
BRAF	0.142559	0.103838	0.257982	0.0616678	0	0.0749837
BRSK1	0.131626	0.108946	0.257376	0.0453974	0	0.232093
BRSK2	0.157735	0.252152	0.033838	0.0110831	0.0120591	0
BTK	0.0926065	0.691534	0.33379	0.183352	0.23665	0.447191
CAMK1	0.0351016	0.0828983	0.0174011	0	0.101198	0
CAMK1D	0.186227	0.301661	0.0322644	0.0154248	0.120591	0
CAMK1G	0.0460801	0.163579	0.0172421	0	0.0994058	0
CAMK2A	0.562142	1	0.100916	0.0389406	0.0423697	0
CAMK2B	0.177317	0.471861	0.0345756	0.00853698	0.0907689	0
CAMK2D	0.236065	0.715937	0.0364347	0.0256765	0.0668137	0
CAMK2G	0.113314	0.440047	0.0364782	0.00149772	0.0831098	0
CAMK4	0.033408	0.0384048	0.0188676	0.0064488	0	0
CAMKK1	0.467786	0.607599	0.117729	0.0363399	0	0
CAMKK2	0.471864	0.623718	0.140996	0.0386928	0	0
CDC2L1	0.117828	0.0273992	0.0781529	0.0516048	0.193923	0
CDC2L2	0.1061	0.038298	0.0725726	0.0625853	0.255848	0.0235667
CDK11	0.216841	0.118057	0.336547	0.211481	0.495528	0.526732
CDK2	0.169299	0.127999	0.163289	0	0.158072	0.206057
CDK3	0.129371	0.109997	0.212873	0.0697168	0.62884	0.36215
CDK5	0.108052	0.168014	0.180843	0.0522876	0.621581	0.458105
CDK7	0.0751077	0.10854	0.0753127	0	0.154812	0.0229938
CDK8	0.287634	0.105502	0.487932	0.221596	0.691863	0.643882
CDK9	0.0147769	0.0613413	0.00823053	0.0148148	0.0684433	0.0134667
CHEK1	0.154939	0.183259	0.123914	0.0331155	0.246488	0.106609
CIT	0.0346495	0.0279371	0.177642	0	0	0.0412914
CLK1	0.260069	0.144907	0.231017	0.0643449	0.105435	0.292678
CLK2	0.101736	0.149117	0.134439	0	0.193923	0.0392209
CLK3	0.0285519	0.0229832	0.046201	0.0032244	0.110593	0.00585356
CLK4	0.125534	0.194825	0.0926542	0.0184119	0.0174368	0
CSF1R	0.282464	0.757566	0.520955	0.164577	0.0896282	0
CSK	0.0635054	0.111834	0.120821	0.0969392	0	0.0670105
CSNK1A1L	0.0617694	0.0214729	0.0845004	0	0	0.0280022
CSNK1D	0.176335	0.0452949	0.247524	0	0.0565472	0.146744
CSNK1E	0.0801879	0.0597822	0.183136	0	0.222278	0.0654492
CSNK1G1	0.0294274	0.0388815	0.0579969	0.00496732	0.144707	0.0377263
CSNK1G2	0.0532935	0.0217056	0.0648896	0	0.0483992	0
CSNK1G3	0.0528689	0.0263906	0.0719399	0	0.0798506	0.0788359
CSNK2A1	0.241965	0.249571	0.0673654	0.0779504	0.0211848	0
CSNK2A2	0.22366	0.0512727	0.0685124	0.051663	0.0994058	0
DAPK1	0.427425	0.407073	0.132273	0.0183007	0	0
DAPK2	0.488256	0.44389	0.110939	0.0232842	0	0
DAPK3	0.467043	0.388913	0.238258	0.011939	0	0.102435
DCAMKL1	0.0352143	0.043568	0.0316352	0	0.00977762	0
DCAMKL2	0.0496544	0.0385577	0.0634598	0.0206536	0.159429	0.0708195
DCAMKL3	0.100434	0.034916	0.109332	0.0154248	0.0391105	0
DDR1	0.157511	0.300406	0.592833	0.822995	0.527443	0.0469867
DDR2	0.232338	0.147497	0.51354	0.615308	0.177537	0
DLK	0.240541	0.0353082	0.234471	0.12999	0.0679545	0.0989251
DMPK	0.0839581	0.131218	0.0354224	0	0.0663248	0
DMPK2	0.126624	0.017032	0.116401	0	0.00439993	0.0438226
DRAK1	0.223897	0.145891	0.238985	0	0.00651841	0
DRAK2	0.0900368	0.104802	0.083499	0.0145534	0.0179256	0.292678
DYRK1B	0.0557244	0.210284	0.0466096	6.26257e-05	0.0919096	0.16457
EGFR	0.395838	0.149478	0.336842	0	0.559608	0.127671
EPHA1	0.139179	0.206743	0.251711	0.126087	0.185975	0.118466
EPHA2	0.304956	0.651512	0.475988	0.390706	0.352918	0.509646
EPHA3	0.258831	0.486562	0.462975	0.455246	0.345038	0.185208
EPHA4	0.186082	0.276445	0.497478	0.308275	0.0754443	0.362312
EPHA5	0.432585	0.788146	0.701069	0.367349	0.335627	0.861709
EPHA6	0.0438862	0.0380315	0.147366	0	0.0495399	0
EPHA7	0.110855	0.0570477	0.179556	0.0633237	0.0625768	0.0499698
EPHA8	0.284261	0.45441	0.541541	0.538151	0.498147	0.273644
EPHB1	0.335272	0.431784	0.547078	0.336083	0.122046	0.185311
EPHB2	0.454823	0.832602	0.733976	0.376176	0.376817	1
EPHB3	0.2793	0.486971	0.579986	0.217051	0.0915345	0.753517
EPHB4	0.347655	0.771517	0.482331	0.272574	0.333231	0.690775
ERBB2	0.184267	0.108083	0.0690147	0	0.111954	0
ERBB4	0.183802	0.160545	0.10804	0	0.0581768	0.0351477
ERK1	0.141943	0.0293407	0.349088	0.0513759	0.016296	0.374955
ERK2	0.150311	0.0329487	0.0783299	0	0	0.226832
ERK3	0.0314275	0.00668861	0.0465641	0	0.111954	0
ERK4	0.066076	0.0502804	0.118353	0.020915	0.368882	0.158848
ERK5	0.0222481	0.0384625	0.0215498	0.0043573	0.0793617	0
ERK8	0.049515	0.0563352	0.0698637	0.032244	0.101035	0.0808
FER	0.10094	0.188865	0.12817	0.0463225	0.142746	0.13253
FES	0.189355	0.0810053	0.111164	0.016976	0	0.185437
FGFR1	0.130157	0.113391	0.142048	0.0633149	0.0581768	0
FGFR2	0.16462	0.0997052	0.127281	0.0885542	0.0467696	0
FGFR3	0.138094	0.0778086	0.135043	0.00688882	0.0586657	0.0445064
FGFR4	0.114521	0.11642	0.195381	0.0969045	0	0.234701
FGR	0.194683	0.42531	0.468879	0.204965	0	0
FLT1	0.164893	0.356225	0.293431	0	0.189686	0
FLT3	0.8529	0.501647	0.724401	0.111468	0.118472	0
FLT4	0.146817	0.283668	0.233573	0	0.128739	0
FRK	0.210774	0.36264	0.482822	0.314536	0.0549176	0.0307033
FYN	0.216572	0.348957	0.407134	0.349699	0	0
GAK	0.237092	0.0981528	0.277124	0	0.0309625	0.0110743
GCN2	0.253131	0.553822	0.043817	0.0638133	0.0462807	0
GSK3A	0.213633	0.0446567	0.463727	0.0729444	0.0765913	0.447065
GSK3B	0.152994	0.111315	0.20083	0.0453159	0.514083	0.297678
HCK	0.22491	0.383956	0.461071	0.206924	0.200663	0.11136
IGF1R	0.190126	0.0262291	0.303429	0.0877551	0.00928874	0.292019
IKK-epsilon	0.517906	0.630491	0.419468	0.148953	0.270775	0.476358
INSR	0.146229	0.0553354	0.0650178	0.0412054	0.0179256	0
INSRR	0.214859	0.0570099	0.101659	0.114539	0.0619249	0
IRAK3	0.0999874	0.253503	0.0332113	0.0102706	0.00717025	0
ITK	0.279854	0.107971	0.130782	0.104354	0.0593176	0.0189845
JAK1	0.199595	0.0409968	0.271061	0.00939385	0	0.570843
JAK2	0.337481	0.0704881	0.261771	0.058054	0	0.373962
JAK3	0.327916	0.0638605	0.179864	0.0691387	0	0.0251558
JNK1	0.315951	0.125359	0.311529	0.0409586	0.115702	0.421647
JNK2	0.292734	0.0966336	0.552381	0.0946317	0.171108	0.467904
JNK3	0.242006	0.071349	0.362747	0.0502832	0.154323	0.152967
KIT	0.640278	0.931971	0.881346	0.301948	0.136398	0
LATS1	0.18919	0.0614976	0.261326	0.0670266	0	0.133168
LATS2	0.186446	0.153227	0.0801412	0	0	0
LCK	0.120317	0.358298	0.437081	0.566714	0.0612582	0.0239247
LIMK1	0.10645	0.033499	0.19528	0.0683361	0.061436	0.123594
LIMK2	0.087717	0.107519	0.105059	0.0516048	0.136641	0.0757614
LKB1	0.198385	0.294243	0.058866	0.0366509	0	0
LOK	0.376282	0.185429	0.342387	0.135347	0.232055	0
LTK	0.261727	0.0551228	0.431637	0.105123	0.0185775	0.336726
LYN	0.135043	0.574129	0.585877	0.510601	0.145085	0.112972
MAP3K4	0.184837	0.0286517	0.274741	0.0973978	0.0185775	0.243276
MAP3K5	0.134356	0.0815093	0.0244112	0.0087146	0	0
MAP4K1	0.234416	0.0930709	0.099985	0.0239635	0.139657	0
MAP4K3	0.147786	0.138052	0.0625261	0.0693956	0.131998	0
MAP4K4	0.21624	0.0655452	0.236371	0.137341	0.0483992	0.0767899
MAP4K5	0.220874	0.0588574	0.0883923	0.0601341	0.173879	0
MAPKAPK2	0.117084	0.0138684	0.345625	0.0471712	0	0.368115
MAPKAPK5	0	0	0	0	0	0
MARK1	0.166443	0.261499	0.0808645	0.0102706	0.036992	0.0192807
MARK2	0.313313	0.441128	0.0493181	0.0464292	0.0505177	0
MARK3	0.251086	0.562066	0.0306836	0.0457167	0.0374809	0
MARK4	0.144152	0.30959	0.0278271	0.0197002	0.04514	0
MEK1	0.0669896	0	0.0880228	0	0.0479103	0
MEK2	0.0644302	0	0.0843171	0	0	0
MEK3	0.128028	0.221772	0.0384328	0.00748858	0.0488881	0
MEK4	0.0404421	0.0919181	0.0387301	0	0.0309625	0
MEK6	0.134349	0.0430148	0.0363443	0.0236877	0.0826209	0
MELK	0.223077	0.227026	0.0664375	0.134522	0.0195552	0
MERTK	0.0879236	0.0869812	0.103299	0.0277774	0.109183	0
MET	0.0548911	0.0583864	0.0314519	0.020695	0.117006	0
MKNK1	0.125055	0.0168193	0.172004	0.0330573	0.0749617	0.0474999
MKNK2	0.143847	0.0900577	0.187278	0.060431	0.0690952	0.108947
MLCK	0.755376	0.0801364	0.230693	0.138983	0.0765913	0.18741
MLK1	0.250609	0.478225	0.0586418	0.0704032	0.0425326	0.00357718
MLK2	0.0991748	0.150149	0.0141963	0.0378496	0.00651841	0
MLK3	0.289704	0.624027	0.0309037	0.0585017	0	0
MRCKA	0.0637057	0.0301094	0.0383522	0.00348584	0.0498885	0
MRCKB	0.0538445	0.0219298	0.0623183	0.0043573	0.0174368	0.0169279
MST1	0.631934	0.881508	0.096901	0.0909114	0.130368	0
MST2	0.507018	0.547408	0.132525	0.0433115	0.0912578	0
MST3	0.109465	0.0307175	0.0850669	0	0.149923	0
MST4	0.130638	0.0468646	0.133137	0	0.0891393	0.0266528
MUSK	0.241496	0.113091	0.350622	0.149833	0.078221	0.0196309
MYLK	0.183857	0.170223	0.108451	0	0.0586657	0
MYLK2	0.174059	0.0617052	0.130014	0.0376746	0.0260737	0
MYO3A	0.0945381	0.0293975	0.138196	0.0644865	0.151966	0.174842
MYO3B	0.0771627	0.0100804	0.108315	0.0527493	0	0.05858
NDR2	0.122964	0.0906248	0.0665407	0.00496732	0	0
NEK1	0.0668173	0.0310343	0.0206864	0.0032244	0.0291126	0.00585356
NEK2	0.0539024	0.033929	0.0189606	0	0	0.0853313
NEK5	0.117876	0.0120672	0.0518307	0.0481321	0.00439993	0.0198561
NEK6	0.105252	0.00921801	0.180749	0.0207212	0	0.181642
NEK7	0.0847269	0.017793	0.0439929	0	0	0.0295071
NEK9	0.15383	0.0336228	0.0757842	0	0	0.21946
NLK	0.244017	0.0391047	0.250883	0.00174292	0	0.120235
p38-alpha	0.565027	0.221292	1	0.364067	1	0.578218
p38-beta	0.247286	0.0549512	0.375236	0.107243	0	0.227718
p38-gamma	0.426541	0.0564329	0.38986	0.0915043	0.0228144	0.393929
PAK1	0.514256	0.42571	0.0826934	0.0497938	0	0
PAK2	0.264954	0.274516	0.0392504	0.0374429	0	0
PAK3	0.170706	0.297622	0.068508	0.0261404	0.0521473	0
PAK4	0.172422	0.0601673	0.0885971	0.0293682	0.0549176	0.198685
PAK6	0.410023	0.249316	0.0962089	0.0250109	0.0467696	0
PAK7/PAK5	0.420602	0.206325	0.0910241	0.0409586	0.0765913	0
PCTK1	0.124006	0.0458314	0.0393205	0.0156863	0.130368	0
PCTK2	0.146519	0.107323	0.19168	0.0894989	0.521848	0.431094
PCTK3	0.129177	0.114973	0.249996	0.0772985	0.718183	0.464077
PDGFRA	0.413301	0.612219	0.649675	0.252938	0	0
PDGFRB	0.526088	0.628203	0.6197	0.175981	0.0907689	0
PDPK1	0.355584	0.51267	0.0914026	0.0260603	0	0
PFTK1	0.0853266	0.062901	0.115105	0.0711982	0.107294	0.208045
PHKG1	0.262303	0.245446	0.155429	0.032854	0.0521473	0
PHKG2	0.883638	0.735084	0.23446	0.0467974	0	0
PIK3CA	1	0.405795	0.44863	0	0.415354	0.218579
PIK3CB	0.213647	0.102467	0.0853576	0	0.117331	0.128493
PIK3CD	0.865863	0.439712	0.211597	0	0.0814802	0.0892312
PIK3CG	0.412449	0.206638	0.124503	0	0.105924	0.116001
PIM1	0.109322	0.347832	0.0280499	0.0125251	0	0
PIM2	0.425001	0.267328	0.10501	0.0261438	0	0
PIM3	0.173951	0.387953	0.1662	0	0	0
PIP5K1A	0.213687	0.211853	0.0530575	0.0635553	0.053288	0
PIP5K2B	0.191959	0.152984	0.0543118	0.0391971	0.0879986	0
PKAC-alpha	0.104358	0.107544	0.117781	0.00043838	0	0
PKAC-beta	0.145834	0.127974	0.174317	0.0212927	0	0.0332229
PKMYT1	0.063385	0.129147	0.0550791	0.0236296	0.0820991	0.148327
PKN1	0.343227	0.64194	0.0533299	0.0447923	0	0
PKN2	0.26086	0.599178	0.04903	0.035133	0.00994058	0
PLK1	0.0794067	0.0462014	0.0260756	0.0043573	0.0277033	0
PLK3	0.134521	0.0379826	0.0862513	0	0.0223256	0.183734
PLK4	0.335471	0.130467	0.116331	0.091124	0.206471	0
PRKCA	0.260348	0.0775579	0.070444	0	0.150575	0
PRKCB	0.260348	0.0775579	0.070444	0	0.150575	0
PRKCD	0.376742	0.322054	0.135349	0	0.0896282	0
PRKCE	0.386634	0.360204	0.143613	0	0.0488881	0
PRKCH	0.274556	0.300388	0.0443602	0	0.0814802	0
PRKCQ	0.359666	0.138129	0.154156	0	0.0837616	0
PRKD1	0.194023	0.0966426	0.150417	0	0	0.353498
PRKD2	0.110024	0.0725763	0.077177	0.0110675	0	0.147648
PRKD3	0.0491653	0.15784	0.0177932	0.0228349	0.020696	0.00235667
PRKG1	0.143098	0.351903	0.0129559	0.0231715	0	0
PRKG2	0.23268	0.410298	0.0419733	0.0261404	0	0
PRKR	0.133113	0.0278641	0.133769	0.027278	0	0.0256825
PRKX	0.242134	0.247576	0.0727038	0.00748858	0	0.170124
PTK2	0.12036	0.0781882	0.0962399	0.00784314	0	0
PTK2B	0.135517	0.181314	0.139985	0.105736	0.0016296	0.0249847
PTK6	0.133812	0.128602	0.192374	0.0668673	0.0316143	0.0295071
RAF1	0.0921047	0.0545337	0.199659	0.0329101	0	0.00241883
RET	0.437657	0.303882	0.661763	0.278312	0.159212	0
RIOK1	0.201887	0.0639506	0.065917	0.0378496	0.0879986	0
RIOK3	0.145553	0.238096	0.0292811	0.0297614	0.0674656	0
RIPK1	0.325534	0.0608701	0.127654	0.192839	0.177627	0
RIPK2	0.0980529	0.0178554	0.171572	0	0.0505177	0
ROS1	0.160495	0.221393	0.0607303	0.0381487	0	0.0510373
RPS6KA1	0.163212	0.0850171	0.130824	0	0.0159701	0.0254709
RPS6KA2	0.180716	0.112508	0.0817428	0.0108326	0.0521473	0.00110743
RPS6KA3	0.102226	0.142759	0.0362774	0.0120082	0	0
RPS6KA4	0.180485	0.235137	0.0799516	0.0123373	0	0
RPS6KA5	0.206634	0.283374	0.133358	0.0168927	0	0
RPS6KA6	0.203249	0.235556	0.166289	0.00658995	0.00928874	0.0189845
SgK085	0.203004	0.126981	0.0959628	0.0191996	0	0
SLK	0.417242	0.193552	0.214874	0.106497	0.191804	0
SNARK	0.512893	0.540633	0.131485	0.0546405	0.112443	0
SNF1LK	0.306389	0.617078	0.178764	0.154737	0.0267255	0.0175447
SNF1LK2	0.253036	0.511218	0.174226	0.0814043	0.116843	0.0135573
SRC	0.165519	0.211613	0.294189	0.270882	0	0
SRMS	0.0453838	0.0722858	0.1193	0.0418852	0	0.00558242
SRPK1	0.38545	0.577928	0.0419507	0.0863134	0.0418808	0
SRPK2	0.224562	0.287553	0.0552623	0.0336555	0	0
STK16	0.0791348	0.127219	0.0596712	0.0173473	0.12662	0
STK33	0.220823	0.155226	0.151349	0.0171678	0.0016296	0
STK36	0.100769	0.0438503	0.136172	0.0273638	0.190686	0.178543
SYK	0.111552	0.143513	0.231866	0.0148423	0.402023	0.292678
TEC	0.0697866	0.0929666	0.083373	0.0120087	0.062958	0.0568897
TESK1	0.0653562	0.0682521	0.10948	0.0799098	0.0748854	0.0233595
TGFBR1	0.047215	0.0753204	0.0272014	0.0120087	0.0183069	0.0400449
TGFBR2	0.0214312	0.0214	0.0444302	0.0407988	0.109179	0.109366
TIE1	0.3249	0.0595144	0.385414	0.248886	0.154323	0.137257
TIE2	0.231659	0.0561902	0.279073	0.179026	0.145035	0.0917489
TLK1	0.0498951	0.0356093	0.0520322	0	0.0505177	0
TLK2	0.0935881	0.0519574	0.0389084	0.00087146	0.0423697	0
TNIK	0.258031	0.05814	0.169114	0.0374429	0.0304736	0.0295842
TNK1	0.154401	0.160982	0.082668	0.0884079	0.0619249	0
TNK2	0.346068	0.787002	0.175483	0.141099	0.147981	0.323697
TNNI3K	0.0400995	0.0727506	0.0590496	0.00987304	0.00228144	0
TRKA	0.36035	0.218054	0.150065	0.200158	0.0700729	0
TRKB	0.169202	0.237877	0.144906	0.110529	0	0
TRKC	0.213264	0.215634	0.210701	0.131036	0.0467696	0.00660311
TSSK1	0.220802	0.241846	0.0773186	0.00554155	0	0.162752
TTK	0.110826	0.127377	0.127588	0	0.189034	0.00985449
TXK	0.175364	0.307148	0.171069	0.115625	0.144583	0.275421
TYK2	0.23946	0.0666817	0.176256	0.0371996	0	0.50439
TYRO3	0.072597	0.0180028	0.113305	0	0.040903	0
VEGFR2	0.253043	0.371476	0.538938	0.00356966	0.0195552	0
WEE1	0.13257	0.0285342	0.0512499	0.0465024	0.0355253	0.0123611
YANK2	0.0685328	0.0287399	0.0582511	0	0.0195552	0.0189845
YANK3	0.067178	0.0407546	0.0122056	0.0043573	0	0
YES	0.209613	0.317058	0.398496	0.305275	0	0
YSK1	0.0789301	0.0652009	0.0394679	0.0145543	0.0570361	0
ZAK	0.247383	0.146582	0.551778	0.464097	0	0
ZAP70	0.134957	0.216059	0.0181583	0.0150037	0	0
